# Supplementary material for: Are trajectories of neck–shoulder pain associated with sick leave and work ability in workers? A 1-year prospective study
Source: PubMed Central journal article supplement — BMJ Open. 2019 Mar 20;9(3):e022006. doi: 10.1136/bmjopen-2018-022006 (PMC6475446; doi:10.1136/bmjopen-2018-022006), 2019-03-20
Supplement: bmjopen-2018-022006.draft_revisions.pdf [file bmjopen-2018-022006.draft_revisions.pdf]

# BMJ Open

BMJ Open is committed to open peer review. As part of this commitment we make the peer review history of every article we publish publicly available.

When an article is published we post the peer reviewers' comments and the authors' responses online. We also post the versions of the paper that were used during peer review. These are the versions that the peer review comments apply to.

The versions of the paper that follow are the versions that were submitted during the peer review process. They are not the versions of record or the final published versions. They should not be cited or distributed as the published version of this manuscript.

BMJ Open is an open access journal and the full, final, typeset and author-corrected version of record of the manuscript is available on our site with no access controls, subscription charges or pay-per-view fees (<http://bmjopen.bmj.com>).

If you have any questions on BMJ Open's open peer review process please email [info.bmjopen@bmj.com](mailto:info.bmjopen@bmj.com)

# BMJ Open

## Longitudinal trajectories of neck–shoulder pain in workers: Influence on sick leave and work ability over 1 year

|                               |                                                                                                                                                                                                                                                                                                                                                                                                               |
|-------------------------------|---------------------------------------------------------------------------------------------------------------------------------------------------------------------------------------------------------------------------------------------------------------------------------------------------------------------------------------------------------------------------------------------------------------|
| Journal:                      | <i>BMJ Open</i>                                                                                                                                                                                                                                                                                                                                                                                               |
| Manuscript ID                 | bmjopen-2018-022006                                                                                                                                                                                                                                                                                                                                                                                           |
| Article Type:                 | Research                                                                                                                                                                                                                                                                                                                                                                                                      |
| Date Submitted by the Author: | 01-Feb-2018                                                                                                                                                                                                                                                                                                                                                                                                   |
| Complete List of Authors:     | Hallman, David; University of Gävle, Centre for Musculoskeletal Research<br>Holtermann, Andreas; National Research Centre for the Working Environment,<br>Dencker-Larsen, Sofie; National Research Centre for the Working Environment<br>Birk Jørgensen, Marie; National Research Centre for the Working Environment<br>Nørregaard Rasmussen, Charlotte; National Research Centre for the Working Environment |
| Keywords:                     | EPIDEMIOLOGY, OCCUPATIONAL & INDUSTRIAL MEDICINE, PUBLIC HEALTH                                                                                                                                                                                                                                                                                                                                               |
|                               |                                                                                                                                                                                                                                                                                                                                                                                                               |

SCHOLARONE™  
Manuscripts

1  
2  
3 **Title: Longitudinal trajectories of neck–shoulder pain in workers:**  
4 **Influence on sick leave and work ability over 1 year**  
5  
6

7 Authors: David M Hallman<sup>1\*</sup>, Andreas Holtermann<sup>2,3</sup>, Sofie Dencker-Larsen<sup>2</sup>, Marie Birk  
8 Jørgensen<sup>2</sup>, Charlotte Diana Nørregaard Rasmussen<sup>2</sup>  
9  
10

11 Affiliations:  
12

13  
14 <sup>1</sup>Centre for Musculoskeletal Research, Department of Occupational and Public Health  
15 Sciences, University of Gävle, Gävle, Sweden  
16

17 <sup>2</sup>National Research Centre for the Working Environment, Copenhagen, Denmark  
18

19 <sup>3</sup>Department of Sports Science and Clinical Biomechanics, University of Southern Denmark,  
20 Odense, Denmark  
21  
22

23  
24 \*Corresponding author:

25 David M Hallman, University of Gävle, Kungsbäcksvägen 47, 80176 Gävle, Sweden; Email:  
26 [david.hallman@hig.se](mailto:david.hallman@hig.se); Phone: +46 736266413  
27  
28

29  
30 Funding: The study was supported by grants from the Danish government (Satspulje) and the  
31 Swedish Research Council for Health, Working Life and Welfare (Forte Dnr.2009–1761).  
32  
33

34  
35 Conflict of interest: None to declare.  
36  
37

38 Author contributions:

39 DMH contributed to the statistical data analyses and drafting of the manuscript. AH and MBJ  
40 contributed to the conception, design, data collection and funding of the full DPHACTO  
41 study. All authors (DMH, AH, SDL, MBJ, and CDNR) contributed to the conception of this  
42 study, discussed the results and commented on the manuscript.  
43  
44  
45  
46

47 Data sharing statement:

48 Additional data can be accessed on request by email ([aho@arbejdsmiljoforskning.dk](mailto:aho@arbejdsmiljoforskning.dk)).  
49  
50

51  
52 The manuscript contains 3700 words, 3 tables, 2 figures, and 3 Supplemental figures (A-C).  
53  
54  
55  
56  
57  
58  
59  
60

## Abstract

### Objectives

The study aimed to determine the extent to which latent trajectories of neck-shoulder pain (NSP) are associated with self-reported sick leave and work ability based on frequent repeated measures over 1 year in an occupational population.

### Methods

This longitudinal study included 748 Danish workers (blue-collar, n=620; white collar, n=128). A questionnaire was administered to collect data on personal and occupational factors at baseline. Text messages were used for repeated measurements of NSP intensity (numeric scale 0-10) over 1 year (14 waves in total). Simultaneously, self-reported sick leave (days/month) due to pain was assessed at four week intervals, while work ability was assessed using a single item (work ability index) at 12 week intervals over the year. Trajectories of NSP, distinguished by latent class growth analysis (LCGA), were used as predictors of sick leave and work ability in generalized estimation equations with multiple adjustments.

### Results

Both sick leave and work ability were affected by NSP trajectory class. Referencing “low NSP”, the relative risk (RR) from the fully adjusted model indicated a statistically significant ( $p<0.001$ ) increase in sick leave for the NSP trajectories “moderate” (RR=3.1), “strong fluctuating” (RR=7.6) and “severe persistent” (RR 13.8). Similarly, the odds ratio (OR) for reduced work ability increased significantly ( $p<0.001$ ) for the NSP trajectories “moderate” (OR=2.4), “strong” (OR=8.12) and “severe persistent” (OR=12.9).

### Conclusion

Severe persistent NSP was strongly associated with sick leave and poor work ability over 1 year among workers. LCGA can be useful to distinguish important target groups in future observational/intervention studies on NSP.

**Keywords:** Chronic pain; LCGA; Neck pain; Occupational; Pain trajectories

### Strengths and limitations of this study

- Some of the strengths of this study are:
  - Strength: identifying workers at high risk of sick leave and poor work ability due to pain is an important issue.
  - Strength: frequent repeated assessment of neck-shoulder pain, sick leave and work ability over 1 year.
  - Strength: high response rate during each month of follow-up.
- One of the limitations of this study was that sick leave was measured using self-report.

## Introduction

Neck-shoulder pain (NSP) is a common musculoskeletal disorder in the working population.<sup>1</sup> Sick leave and reduced work ability due to NSP impose a considerable economic burden on organizations and society.<sup>2-5</sup>

NSP is considered a heterogeneous condition ranging from very mild symptoms to severe chronic pain<sup>6</sup> with a substantial individual variability in progression over time.<sup>7-9</sup> This heterogeneity may, however, comprise homogenous sub-populations with distinct patterns of pain, unique risk factors and different underlying pathophysiology.<sup>10</sup> Revealing such sub-populations is likely important for early identification, establishing risk factors, and improving prevention and treatment.<sup>11</sup> However, most existing studies have been conducted on patients with low back pain, e.g.,<sup>11-13</sup> while studies identifying and describing the patterns of NSP in working populations with a wide range of pain severities are sparse. Also, there is a lack of research on the predictive validity of NSP sub-populations. Thus, it is important to distinguish sub-populations of workers with different patterns of NSP (e.g. severity, temporal variability and time course) while assessing their predictive value against core prognostic outcomes, such as sick leave and work ability.<sup>5 14 15</sup>

Most previous studies on the prognosis of NSP have relied only on few measurements in time interspersed by long intervals, e.g. years.<sup>7 16</sup> Such studies are not designed to capture the detailed time course (trajectory) or temporal fluctuations in NSP (e.g. between weeks or months). In contrast, frequent repeated measurements of pain facilitate accurate and precise identification of individual pain trajectories<sup>17</sup> and minimize recall bias.<sup>18</sup>

Latent class growth analysis (LCGA) is a common statistical approach for identifying homogenous sub-populations (latent classes) based on individual growth parameters (i.e. intercept, slope and residual variance) in repeated measures data.<sup>19</sup> We have previously used LCGA to distinguish trajectory classes of NSP among workers based on frequent repeated measurements of NSP over 1 year<sup>20</sup> We identified six distinct trajectories of NSP ranging from “asymptomatic” (prevalence 11%) to “severe persistent NSP” (9%). However, understanding the occupational and clinical relevance of trajectories of NSP requires a determination of their predictive validity against core occupational and clinical outcomes.

1  
2  
3 The aim of this study is to determine the extent to which latent trajectories of NSP are  
4 associated with self-reported sick leave due to musculoskeletal pain and work ability based on  
5 frequent repeated measures over 1 year in an occupational population. A second aim is to  
6 investigate the temporal association (within person) between fluctuations in NSP and the  
7 outcomes sick leave and work ability.  
8  
9  
10

## 11 12 **Methods**

### 13 **Study design**

14 This is a prospective study using data from the Danish Physical activity cohort with objective  
15 measurements (DPhacto). The study protocol for the cohort is reported in detail elsewhere.<sup>21</sup>  
16 Data collection took place from April 2012 to May 2014 at 15 Danish work places, including  
17 workers in four occupational sectors (cleaning, manufacturing, transportation and office  
18 work/administration).  
19  
20  
21  
22  
23  
24  
25

26 Baseline data collection consisted of a brief web-based questionnaire, a standard health  
27 examination and objective diurnal measurements of physical activity and heart rate (presented  
28 elsewhere.<sup>22 23</sup> Prospective self-reported data on musculoskeletal pain, sick leave due to pain  
29 and work ability was collected repeatedly over 12 months using text messages.  
30  
31  
32  
33

### 34 **Study population**

35 The inclusion criterion for participation was current employment within any of the recruited  
36 work places. Exclusion criteria were holding a managing position or being pregnant or a  
37 student/trainee. In addition, workers not responding to the baseline questionnaire and/or the  
38 prospective measurements were excluded.  
39  
40  
41  
42  
43

44 Among the 2107 invited workers, 1119 agreed to participate and 32 of them were excluded  
45 due to holding a managing position (n=17) or being pregnant (n=2) or a student/trainee  
46 (n=13). Of the remaining 1087 eligible workers, 782 responded to the questionnaire and 748  
47 took part in the prospective measurements from baseline. Thus, the final study sample  
48 consisted of 748 workers (blue-collar, n=620; white collar, n=128). Descriptive characteristics  
49 of the study population are shown in Table 1.  
50  
51  
52  
53  
54  
55  
56  
57  
58  
59  
60

1  
2  
3 All participants provided their written informed consent prior to participation. The present  
4 study was conducted according to the Declaration of Helsinki, approved by the Danish Data  
5 Protection Agency, and evaluated by the Regional Ethics Committee in Copenhagen,  
6 Denmark (H-2-2012-011).  
7  
8  
9

### 10 11 **Repeated assessment using text messages**

12 Text messages (SMS) were used to assess self-reported pain intensity in the neck-shoulder  
13 region, days on sick leave and work ability using the commercial software “SMS-Track”  
14 (<https://sms-track.com/>). Starting at baseline, data on NSP and sick leave were collected at  
15 four week intervals (14 waves), while data on work ability were collected at 12 week intervals  
16 (4 waves in total) during the 1-year study. The SMS were sent on Sundays, with a reminder  
17 the following day.  
18  
19  
20  
21  
22

### 23 24 **Neck-shoulder pain**

25 Pain intensity in the neck-shoulder region (NSP) the past month was assessed using an 11-  
26 point numeric rating scale (NRS), which ranges from 0 (“no pain”) to 10 (“worst pain  
27 imaginable”). The worker responded to the question “*rate the worst pain you have*  
28 *experienced in your neck/shoulders within the past month?*” The NRS is a reliable and valid  
29 instrument for assessing pain intensity<sup>24</sup> and is recommended as an outcome in clinical  
30 trials.<sup>25</sup>  
31  
32  
33  
34  
35

### 36 37 38 **Sick leave**

39 Sick-leave was assessed using a single-item from the validated Outcome Evaluation  
40 Questionnaire<sup>26</sup>: “*Within the past month, how many days have you been absent from work*  
41 *due to pain in muscles or joints?*” with response categories ranging from 0 to 31 days. Based  
42 on a recent meta-analysis, self-reported sick leave demonstrates good test-retest reliability and  
43 reasonably high convergent validity against records.<sup>27</sup>  
44  
45  
46  
47  
48

### 49 50 **Work ability**

51 Work ability was assessed using a validated single item<sup>28</sup> from the work ability index.<sup>29</sup> The  
52 worker responded to the question “*Please rate your present work ability?*” with response  
53 categories ranging from 0 (unable to work) to 10 (“work ability as its best”). A score  $\leq 7$   
54 denotes poor work ability.<sup>30</sup>  
55  
56  
57  
58  
59  
60



### Assessment of possible confounders and effect modifiers

Theoretical assumptions and empirical evidence were used to select possible confounders and effect modifiers which were accounted for in the statistical analyses. The following variables were measured at baseline as previously described<sup>20</sup>: age (years,) and gender (male or female) based on civil registration number, body mass index (BMI) based on objectively measured height and weight, occupational sector (blue-collar or administration/office work), seniority in the current job (years), and physical work load (scale 1-10, with higher values indicating higher work load). Multisite pain was measured based on the Standardized Nordic questionnaire for the analysis of musculoskeletal symptoms<sup>31</sup> asking about pain intensity (NRS, scale 0-10) during the past three months in seven different anatomical areas (i.e. neck/shoulders, elbows, hands/wrists, lower back, hips, knees, and feet/ankles). A cut-point of >2 was used to indicate the occurrence of pain, whereby the number of pain sites was determined.<sup>32</sup> Since the relationship between NSP, sick leave and work ability may depend on the level of physical demands at work, physical work load was considered both a confounder and an effect modifier, while the other variables were solely included as possible confounders.

### Statistical analyses

Growth trajectories (latent classes) of the intensity in NSP were identified using LCGA in Latent Gold version 5.1 (Statistical innovations Belmont, MA). The LCGA procedure and the resulting trajectory classes of NSP are described in detail elsewhere.<sup>20</sup> In brief, the LCGA assigns individuals to latent classes based on probabilities. That is, using growth parameters (i.e. intercept, slope and residual variance) reflecting change over time, LCGA assigns individuals to latent classes (categorical variable) assuming homogeneity within class and heterogeneity between classes.<sup>19</sup> In this study, LCGA models were performed using Time (14 waves over 1 year) as a continuous predictor and NSP intensity as a continuous dependent variable. Missing values were considered as missing at random and included in all models without imputations. The optimal number of classes was determined based on appropriate model fit indices, i.e. Bayesian information criterion (BIC), Entropy and Boot strap log likelihood ratio (BLRT), which were obtained in consecutive LCGA models with 1-10 a priori class solutions. Then, the models were evaluated based on the estimated growth parameters and clinical distinction between the identified classes. The identified trajectories of NSP were used as an independent variable in further statistical analyses.

1  
2  
3 The effect of NSP trajectories on sick leave (SMS at four week intervals over 1 year) and  
4 work ability (SMS each quarter) were determined using Generalized Estimation Equation  
5 (GEE) regression modeling with an auto regressive first order (AR1) covariance structure.  
6  
7

8  
9 The effect of NSP trajectories on sick-leave (days/month) was tested using GEE with a  
10 Poisson distribution and a log link function. Fixed factors were NSP trajectory class  
11 (categories: low, moderate, strong fluctuating and severe persistent NSP) and time  
12 (continuous variable, 14 time points). The primary GEE models were constructed in three  
13 steps: (model 1) unadjusted, (model 2) adjusted for age, gender and BMI, and (model 3)  
14 additionally adjusted for occupational sector (four categories) and physical work load  
15 (continuous variable). To test the robustness of the primary models, secondary models were  
16 estimated with additional adjustment for the intensity of NSP (model 4) and the number of  
17 pain regions (model 5) at baseline (past three months). Finally, to test for potential effect  
18 modification by physical work load, model 3 was re-run with an interaction between NSP  
19 trajectory class and physical work load (model 6).  
20  
21  
22  
23  
24  
25  
26

27  
28 The effect of NSP trajectory class on work ability was tested using GEE regression modeling  
29 with a multinomial distribution and a cumulative logit link function. Fixed factors were NSP  
30 trajectory class and time (continuous variable, 4 time points). The models were constructed  
31 with and without adjustment for covariates, as explained above.  
32  
33  
34  
35

36  
37 Additional GEE models were constructed to investigate the within person effect of temporal  
38 fluctuations in the intensity of NSP on fluctuations in sick leave and work ability. Due to the  
39 high work ability and low prevalence of sick leave in the classes with lower intensities of  
40 NSP, these analyses included only workers assigned to the trajectory classes “strong” and  
41 “severe persistent” NSP (n=248). To partition the within and between subjects variances in  
42 the predictor (intensity of NSP), the mean pain intensity score across all time points was  
43 determined for each individual. Then, the person mean pain score was subtracted from each  
44 repeated pain rating and used as an independent variable (within subject effect), while  
45 adjusting for the person mean pain as a covariate (between subjects effect).<sup>33</sup> The GEE model  
46 specifications for sick leave and work ability were the same as above. The models were  
47 estimated with and without adjustment for potential confounders as explained above.  
48  
49  
50  
51  
52  
53  
54  
55  
56  
57  
58  
59  
60

1  
2  
3 The regression models were estimated using SPSS software version 22 (IBM, USA). For each  
4 model, we derived the exponential estimate, i.e. relative risk (RR) and odds ratio (OR) for  
5 sick leave and work ability, respectively, and 95% confidence intervals (CI). P-values <0.05  
6 were considered significant.  
7  
8  
9  
10  
11  
12  
13  
14  
15  
16  
17  
18  
19  
20  
21  
22  
23  
24  
25  
26  
27  
28  
29  
30  
31  
32  
33  
34  
35  
36  
37  
38  
39  
40  
41  
42  
43  
44  
45  
46  
47  
48  
49  
50  
51  
52  
53  
54  
55  
56  
57  
58  
59  
60

For peer review only

## Results

### Characteristics of the study population

Characteristics of the study population are shown in Table 1. The study sample consisted of both males and females, and most were blue-collar workers. The workers were on average of middle age, slightly overweight, and had been in their current job for 14 years. The mean intensity of NSP across all time points was 2.6 (scale 0-10). Most of the workers rated high work ability (>7, scale 0-10) across the study period, while the average worker accumulated 6 days on sick leave due to pain over 1 year, although with a considerable dispersion between individuals. Compliance to the repeated measurements (SMS) in the study was high; the average worker responded to >90% of the SMS (Table 1).

[Insert Table 1 about here]

### Identified latent trajectories of NSP

Based on model fit indices (BIC, Entropy and BLRT) and distinction between classes obtained from consecutive LCGA models, a six-class solution was chosen.<sup>20</sup> The growth pattern and prevalence (%) of the six identified trajectory classes of NSP were characterized as follows (see also Supplemental Figure A): class 1, *asymptomatic* (11%); class 2, *very low NSP* (10%); class 3, *low recovering NSP* (18%); class 4, *moderate fluctuating NSP* (28%); class 5, *strong fluctuating NSP* (24 %); and class 6, *severe persistent NSP* (9%). The trajectory classes with lower intensities of NSP (classes 1-3) did not differ in total days on sick leave (One-way ANOVA:  $p=0.32$ ) or mean work ability (One way ANOVA:  $p=0.27$ ) over 1 year; and the occurrence of sick leave was very low, while work ability was high across the three classes. Thus, classes 1-3 were merged into a single category (low NSP 39%), which was used as a reference in further analyses.

## **Descriptive data on sick leave and work ability over 1 year across the identified trajectories of NSP**

The trajectory classes of NSP differed in both total days of sick leave and mean work ability over the 1 year study period (Supplemental Figures B and C). The total accumulated days on sick leave increased in the trajectory classes with moderate, strong and severe persistent NSP, while mean work ability decreased.

## **Effect of NSP trajectory classes on sick leave over 1 year**

Poisson regression estimates of the effect of NSP trajectories on sick leave due to pain (days /month) are shown in Table 2. There was no significant time effect on sick leave (unadjusted RR=1.02, 95%CI 0.99-1.06). Thus, the interaction between NSP trajectory class and time was discarded from the models.

Days on sick leave due to pain were positively associated with the severity of NSP (Table 2, Figure 1). Referencing low NSP, the classes with moderate, strong fluctuating, and severe persistent NSP trajectories showed increasing positive RRs for days on sick leave each month. The estimated RR was only marginally reduced after adjustment for personal (age, gender and BMI) and occupational (sector and physical work load) factors (models 2 and 3).

Additional adjustment for multisite pain showed similar estimates for moderate NSP (RR=3.0, 95%CI 1.7–5.4), strong fluctuating NSP (RR=7.2, 95%CI 3.5–14.5) and severe persistent NSP (RR=13.1, 95%CI 6.1–28). Also, adjustment for baseline pain intensity revealed stronger estimates for moderate NSP (RR=3.7, 95%CI 2.1–6.8), strong fluctuating NSP (RR=10.9, 95%CI 5.1–23.7) and severe persistent NSP (RR=24.5, 95%CI 10.4–57.9), although with wider CIs.

There was no significant interaction between NSP trajectory class and physical work load on sick leave.

[Insert Figure 1 about here]

### Effect of trajectories of NSP on work ability over 1 year

The ordinal regression estimates of the effect of trajectories of NSP on work ability (measured each quarter) are shown in Table 2.

There was a small time effect indicating reduced work ability over the year (unadjusted OR 1.05, 95%CI 0.99–1.11). There was no interaction between NSP trajectory class and time, whereby this interaction was discarded from the model.

NSP trajectory class was inversely associated with work ability (Table 2). The “strong fluctuating”, and “severe persistent” NSP trajectory classes showed increasing ORs for reduced work ability; particularly among those with severe persistent NSP. These significant associations persisted after adjustment for personal and occupational factors (model 2 and 3).

Additional adjustment for multisite pain showed slightly weaker estimates for moderate NSP (RR=2.2, 95%CI 1.7–2.9), strong fluctuating NSP (RR=6.4, 95%CI 4.6–9.0) and severe persistent NSP (RR=10.4, 95%CI 6.7–16.0). Further, adjustment for baseline pain intensity showed similar estimates for moderate NSP (RR=2.6, 95%CI 1.9–3.5), strong fluctuating NSP (RR=9.1, 95%CI 6.3–13.1) and severe persistent NSP (RR=15.4, 95%CI 9.3–25.5).

There was no significant interaction between NSP trajectory class and physical work load on work ability.

[Insert Table 2 about here]

### Within-person effect of NSP on sick leave and workability

The within-person temporal effects of pain intensity on sick leave due to pain and work ability are shown in Table 3. Within person fluctuations in the intensity of NSP were positively associated with fluctuations in sick leave ( $p < 0.001$ ). That is, higher intensity of NSP was associated with more days of sick leave during a particular month at the individual level (Figure 2a). These results persisted in the adjusted models.

A similar within-person association was found between fluctuations in pain intensity and work ability, which did not change after adjustment for potential confounders (Table 3). For

1  
2  
3  
4  
5  
6  
7  
8  
9  
10  
11  
12  
13  
14  
15  
16  
17  
18  
19  
20  
21  
22  
23  
24  
25  
26  
27  
28  
29  
30  
31  
32  
33  
34  
35  
36  
37  
38  
39  
40  
41  
42  
43  
44  
45  
46  
47  
48  
49  
50  
51  
52  
53  
54  
55  
56  
57  
58  
59  
60

example, increasing intensity of NSP was associated with higher probabilities of poor work ability (Figure 2b).

[Insert Table 3 about here]

[Insert Figure 2]

For peer review only

## Discussion

In summary, this prospective study investigated the relationship between LCGA-based trajectories of NSP and the outcomes sick leave and work ability. We found that the distinguished trajectory classes of NSP were strongly associated with sick leave due to pain and poor work ability over 1 year, and that the temporal fluctuations in pain intensity predicted fluctuations in sick leave and work ability at the individual level.

To our knowledge, this study is unique in assessing the predictive validity of LCGA-based trajectories of NSP against important prognostic outcomes among workers. A clear strength of the study is the use of frequent prospective measures of both exposure (intensity of NSP) and outcomes (work ability and sick leave) over 1 year. The high response rate to the SMS is also a strength supporting the feasibility of this method to obtain frequent repeated measurements of pain in future studies on the prognosis of NSP.

### Trajectories of NSP, sick leave and work ability

The trajectory classes of NSP used in this study were distinguished using LCGA, resulting in six distinct trajectories of NSP.<sup>20</sup> This corroborates a study by Lövgren et al. (2014) which used Growth Mixture Modeling to identify six trajectory classes of NSP in nursing students entering working life. In contrast, the severity of NSP in the current sample of workers was much higher, perhaps due to the large proportion of blue-collar workers in this study.<sup>1</sup> The high prevalence of strong fluctuating (24%) and severe persistent NSP (9%), with mean pain intensities of 5 and 7 (scale 0-10), respectively, is noteworthy.

Trajectory class of NSP was strongly associated with the number of days on sick leave over the 1 year study period. Particularly, the fully adjusted model indicated a relative risk of sick leave 14 times higher in the trajectory class with severe persistent NSP, referencing the trajectory class with low NSP (Table 2, model 3). This result persisted even with adjustment for potential confounding by multisite pain, which was associated with NSP and sick leave in previous studies.<sup>15 34 35</sup> Thus, severe persistent NSP appears to be strongly associated with sick leave due to musculoskeletal pain, regardless of multisite pain and other personal and occupational factors.



1  
2  
3 The four trajectory classes of NSP were also associated with poor work ability over the year  
4 (Table 2). For instance, the probability of reporting reduced work ability was 13 times higher  
5 for the trajectory class with severe persistent NSP, referencing the trajectory class low NSP,  
6 regardless of inclusion of potential confounders in the model (Table 2, model 3).  
7

8  
9 Interestingly, including baseline intensity of NSP (i.e. past 3 months) as an additional  
10 covariate in model 3 did not reduce the estimated association for sick leave or work ability. In  
11 fact, this adjustment resulted in even stronger estimates for work ability, which clearly  
12 indicates that the LCGA-based trajectory classes of NSP have a predictive value beyond that  
13 explained by past pain intensity assessed at a single time point.  
14  
15

16  
17  
18 The observed associations between the identified trajectories of NSP and the outcomes sick  
19 leave and work ability support the predictive validity of LCGA-based trajectories of NSP  
20 among workers. Thus, this study supports using LCGA to identify distinct sub-populations of  
21 workers with different patterns of NSP. Further, the predictive value for sick leave and work  
22 ability of the identified trajectory classes supports their usefulness as outcomes or target  
23 groups in future studies.  
24  
25  
26  
27  
28  
29  
30

### 31 **Effect modification by physical work load**

32  
33 High physical work load is a known risk factor for incident NSP and has been associated with  
34 a poor prognosis.<sup>36</sup> Thus, the association for NSP trajectories with sick leave and work ability  
35 was expected to be modified by the level of self-reported physical work load at baseline.  
36  
37 However, we could not confirm any interaction between trajectory class of NSP and physical  
38 work load neither for sick leave nor work ability. Still, it is possible that more precise  
39 technical measurements of physical work exposure would have yielded different results.  
40  
41  
42  
43  
44  
45

### 46 **Association between temporal fluctuations in NSP and fluctuations in sick leave and** 47 **work ability**

48  
49  
50 NSP is often referred to as a recurrent and fluctuating condition.<sup>7</sup> However, the temporal  
51 fluctuations in NSP have rarely been investigated in detail, and few, if any, studies have  
52 examined whether fluctuations in NSP are associated with concomitant changes in sick leave  
53 and work ability. The frequent repeated measures allowed us to assess the within-person  
54  
55  
56  
57  
58  
59  
60

1  
2  
3 temporal association between fluctuations in the intensity of NSP and changes in sick leave  
4 (every fourth week) and work ability (every twelfth week). We found that the within-person  
5 fluctuations in pain intensity were significantly associated with concomitant fluctuations in  
6 sick leave and work ability, which persisted in the fully adjusted model (Table 3). Thus, not  
7 only could we address the differences between workers in temporal patterns of NSP, but also  
8 whether the temporal fluctuations in NSP at the individual level are of predictive value.  
9  
10  
11  
12  
13  
14

### 15 **Methodological discussion**

16  
17  
18 As this study is limited to self-reported measures of pain and the outcomes sick leave and  
19 work ability, one cannot overlook the possibility of bias. Regarding self-reported sick leave,  
20 meta-analytic evidence indicates reasonably high convergent validity against organization and  
21 register-based records, although with a slight tendency for under-reporting.<sup>27</sup> Thus, there is a  
22 risk for underestimation of sick leave in this study.  
23  
24  
25

26  
27 Since this study was conducted in a non-random sample with a predominance of blue-collar  
28 workers, it is important to verify the study findings in other populations.  
29  
30

31 The general notion of NSP as a fluctuating and reoccurring condition is corroborated by our  
32 data, but this is rarely taken into account in observational studies on NSP. The inclusion of  
33 residual variance in the LCGA model allowed us to distinguish trajectory classes with more or  
34 less fluctuating patterns of NSP. Temporal fluctuations were more prominent in the NSP  
35 trajectories with moderate and strong pain, which may have contributed to the lower relative  
36 risk of sick leave and poor work ability compared to the trajectory class with severe persistent  
37 NSP.  
38  
39  
40  
41  
42

43 Since the trajectories with lower intensities of NSP, i.e., including asymptomatic, very low  
44 NSP and low recovering NSP, did not differ regarding their low occurrence of sick leave and  
45 poor work ability, we decided to merge them into a single reference category in the prediction  
46 models. Still, it is possible that these three classes differ in other prognostic outcomes.  
47  
48  
49  
50  
51

### 52 **Conclusion**

53  
54 This study shows that severe persistent NSP is strongly associated with sick leave and poor  
55 work ability over 1 year among workers. The findings indicate that LCGA can be used to  
56  
57  
58  
59  
60

1  
2  
3 identify important sub-populations of workers with a poor prognosis of sick leave and work  
4 ability. Eventually, such sub-populations can be used as outcomes and target groups in future  
5 observational and/or intervention studies, which may improve prevention and treatment of  
6 NSP.  
7  
8  
9

## 10 11 **Acknowledgements**

12 The study was supported by grants from the Danish government (Satspulje) and the Swedish  
13 Research Council for Health, Working Life and Welfare (Forte Dnr.2009–1761).  
14  
15  
16

## 17 18 **Conflict of interest**

19 The authors declare none.  
20  
21  
22

## 23 24 **Author contributions**

25 DMH contributed to the statistical data analyses and drafting of the manuscript. AH and MBJ  
26 contributed to the conception, design, data collection and funding of the full DPHACTO  
27 study. All authors (DMH, AH, SDL, MBJ, and CDNR) contributed to the conception of this  
28 study. All authors (DMH, AH, SDL, MBJ, and CDNR) contributed to the conception of this  
29 study, discussed the results and commented on the manuscript.  
30  
31  
32  
33  
34

## 35 36 **Data sharing statement**

37 Additional data can be accessed on request by email ([aho@arbejdsmiljoforskning.dk](mailto:aho@arbejdsmiljoforskning.dk)).  
38  
39  
40  
41  
42  
43  
44  
45  
46  
47  
48  
49  
50  
51  
52  
53  
54  
55  
56  
57  
58  
59  
60

## References

- 1 Côté P, van der Velde G, Cassidy JD et al. The Burden and Determinants of Neck Pain in Workers: Results of the Bone and Joint Decade 2000-2010 Task Force on Neck Pain and Its Associated Disorders. *J Manipulative Physiol Ther* 2009;32:S70-S86.
- 2 Borghouts JAJ, Koes BW, Vondeling H, Bouter LM. Cost-of-illness of neck pain in The Netherlands in 1996. *Pain* 1999;80:629-636.
- 3 Hansson EK, Hansson TH. The costs for persons sick-listed more than one month because of low back or neck problems. A two-year prospective study of Swedish patients. *Eur Spine J* 2005;14.
- 4 Woodhouse A, Pape K, Romundstad PR, Vasseljen O. Health care contact following a new incident neck or low back pain episode in the general population; the HUNT study. *BMC Health Serv Res* 2016;16:81.
- 5 Holtermann A, Hansen JV, Burr H, Sogaard K. Prognostic factors for long-term sickness absence among employees with neck-shoulder and low-back pain. *Scand J Work Environ Health* 2010;36:34-41.
- 6 Fejer R, Jordan A, Hartvigsen J. Categorising the severity of neck pain: Establishment of cut-points for use in clinical and epidemiological research. *Pain* 2005;119:176-182.
- 7 Carroll L, Hogg-Johnson S, Côté P et al. Course and Prognostic Factors for Neck Pain in Workers. *Eur Spine J* 2008;17:93-100.
- 8 Bruls VEJ, Bastiaenen CHG, de Bie RA. Prognostic factors of complaints of arm, neck, and/or shoulder: a systematic review of prospective cohort studies. *Pain* 2015;156:765-788.
- 9 Côté P, Cassidy JD, Carroll LJ, Kristman V. The annual incidence and course of neck pain in the general population: a population-based cohort study. *Pain* 2004;112:267-273.
- 10 Lövgren M, Gustavsson P, Melin B, Rudman A. Neck/shoulder and back pain in new graduate nurses: A growth mixture modeling analysis. *Int J Nurs Stud* 2014;51:625-639.
- 11 Kongsted A, Kent P, Axen I, Downie AS, Dunn KM. What have we learned from ten years of trajectory research in low back pain? *BMC Musculoskelet Disord* 2016;17:220.

- 1  
2  
3 12 Axén I, Leboeuf-Yde C. Trajectories of low back pain. *Best Practice & Research*  
4 *Clinical Rheumatology* 2013;27:601-612.  
5  
6 13 Dunn KM, Campbell P, Jordan KP. Long-term trajectories of back pain: cohort study  
7 with 7-year follow-up. *BMJ Open* 2013;3.  
8  
9 14 de Vries H, Reneman M, Groothoff J, Geertzen J, Brouwer S. Workers Who Stay at  
10 Work Despite Chronic Nonspecific Musculoskeletal Pain: Do They Differ from  
11 Workers with Sick Leave? *Journal of Occupational Rehabilitation* 2012;22:489-502.  
12  
13 15 Feleus A, Miedema HS, Bierma-Zeinstra SMA, Hoekstra T, Koes BW, Burdorf A.  
14 Sick leave in workers with arm, neck and/or shoulder complaints; defining occurrence  
15 and discriminative trajectories over a 2-year time period. *Occup Environ Med* 2016.  
16  
17 16 Walton DM, Carroll LJ, Kasch H et al. An Overview of Systematic Reviews on  
18 Prognostic Factors in Neck Pain: Results from the International Collaboration on Neck  
19 Pain (ICON) Project. *The open orthopaedics journal* 2013;7:494-505.  
20  
21 17 Axén I, Bergström G, Bodin L. Using few and scattered time points for analysis of a  
22 variable course of pain can be misleading: an example using weekly text message  
23 data. *The Spine Journal* 2014;14:1454-1459.  
24  
25 18 Miranda H, Gold JE, Gore R, Punnett L. Recall of prior musculoskeletal pain. *Scand J*  
26 *Work Environ Health* 2006;32:294-9.  
27  
28 19 Jung T, Wickrama KAS. An Introduction to Latent Class Growth Analysis and  
29 Growth Mixture Modeling. *Soc Personal Psychol Compass* 2008;2:302-317.  
30  
31 20 Hallman DM, Nørregaard Rasmussen CD, Birk Jørgensen M, Holtermann A. Time  
32 course of neck-shoulder pain in workers: A longitudinal latent class growth analysis.  
33 *Scand J Work Environ Health* 2018;44:47-57.  
34  
35 21 Jørgensen M, Korshøj M, Lagersted-Olsen J et al. Physical activities at work and risk  
36 of musculoskeletal pain and its consequences: protocol for a study with objective field  
37 measures among blue-collar workers. *BMC Musculoskelet Disord* 2013;14:1-9.  
38  
39 22 Hallman DM, Birk Jørgensen M, Holtermann A. On the health paradox of  
40 occupational and leisure-time physical activity using objective measurements: Effects  
41 on autonomic imbalance. *PLoS One* 2017;12:e0177042.  
42  
43 23 Hallman DM, Gupta N, Heiden M et al. Is prolonged sitting at work associated with  
44 the time course of neck-shoulder pain? A prospective study in Danish blue-collar  
45 workers. *BMJ Open* 2016;6.  
46  
47 24 Ferreira-Valente MA, Pais-Ribeiro JL, Jensen MP. Validity of four pain intensity  
48 rating scales. *Pain* 2011;152:2399-2404.  
49  
50  
51  
52  
53  
54  
55  
56  
57  
58  
59  
60

- 1  
2  
3 25 Dworkin RH, Turk DC, Farrar JT et al. Core outcome measures for chronic pain  
4 clinical trials: IMMPACT recommendations. *Pain* 2005;113:9-19.  
5  
6 26 Keefe FJ, Linton SJ, Lefebvre JC. The Outcome Evaluation Questionnaire:  
7 Description and Initial Findings. *Scandinavian Journal of Behaviour Therapy*  
8 1992;21:19-33.  
9  
10 27 Johns G, Miraglia M. The reliability, validity, and accuracy of self-reported  
11 absenteeism from work: A meta-analysis. *J Occup Health Psychol* 2015;20:1-14.  
12  
13 28 Ahlstrom L, Grimby-Ekman A, Hagberg M, Dellve L. The work ability index and  
14 single-item question: associations with sick leave, symptoms, and health--a  
15 prospective study of women on long-term sick leave. *Scand J Work Environ Health*  
16 2010;36:404-12.  
17  
18 29 Tuomi K, Ilmarinen J, Jahkola A, Katajarinne L, Tulkki A. *Work ability index*.  
19 Helsinki: Finnish institute of occupational health, 1998.  
20  
21 30 Neupane S, Miranda H, Virtanen P, Siukola A, Nygard CH. Multi-site pain and work  
22 ability among an industrial population. *Occup Med (Lond)* 2011;61:563-9.  
23  
24 31 Kuorinka I, Jonsson B, Kilbom A et al. Standardised Nordic questionnaires for the  
25 analysis of musculoskeletal symptoms. *Appl Ergon* 1987;18:233-237.  
26  
27 32 Neupane S, Leino-Arjas P, Nygård C-H, Oakman J, Virtanen P. Developmental  
28 pathways of multisite musculoskeletal pain: what is the influence of physical and  
29 psychosocial working conditions? *Occup Environ Med* 2016.  
30  
31 33 Hoffman L, Stawski RS. Persons as Contexts: Evaluating Between-Person and  
32 Within-Person Effects in Longitudinal Analysis. *Research in Human Development*  
33 2009;6:97-120.  
34  
35 34 Sarquis LMM, Coggon D, Ntani G et al. Classification of neck/shoulder pain in  
36 epidemiological research: a comparison of personal and occupational characteristics,  
37 disability, and prognosis among 12,195 workers from 18 countries. *Pain*  
38 2016;157:1028-1036.  
39  
40 35 Haukka E, Kaila-Kangas L, Ojajärvi A et al. Pain in multiple sites and sickness  
41 absence trajectories: A prospective study among Finns. *Pain* 2013;154:306-312.  
42  
43 36 Mayer J, Kraus T, Ochsmann E. Longitudinal evidence for the association between  
44 work-related physical exposures and neck and/or shoulder complaints: a systematic  
45 review. *Int Arch Occup Environ Health* 2012;85:587-603.  
46  
47  
48  
49  
50  
51  
52  
53  
54  
55  
56  
57  
58  
59  
60

## Tables

**Table 1** Descriptive characteristics of the study population (n=748)

|                                                        | N        | Range | Mean | SD   |
|--------------------------------------------------------|----------|-------|------|------|
| Age (years)                                            | 748      | 18–68 | 44.8 | 9.6  |
| Men N (%)                                              | 411 (55) |       |      |      |
| BMI (kg×m <sup>-2</sup> )                              | 732      | 16–45 | 27.3 | 4.8  |
| Seniority (years)                                      | 722      | 0–45  | 13.5 | 10.3 |
| Administration workers N (%)                           | 128 (17) |       |      |      |
| Blue-collar workers N (%)                              | 620 (83) |       |      |      |
| Physical work load at baseline (scale 1-10)            | 723      | 1–10  | 5.3  | 2.4  |
| Total days on sick leave (over all time points)        | 746      | 0–319 | 5.8  | 20.9 |
| Mean work ability (over all time points) (scale 0-10)  | 748      | 0–10  | 8.3  | 1.7  |
| Mean NSP intensity (over all time points) (scale 0-10) | 748      | 0–9.6 | 2.6  | 2.3  |
| NSP intensity at baseline (scale 0-10)                 | 748      | 0–10  | 3.0  | 2.7  |
| Number of pain regions (count)                         | 745      | 0–6   | 1.7  | 1.5  |
| Compliance to SMS (missing responses, count)           |          |       |      |      |
| NSP intensity                                          | 748      | 0–13  | 1.2  | 2.7  |
| Sick leave                                             | 746      | 0–13  | 1.2  | 2.6  |
| Work ability                                           | 748      | 0–3   | 0.4  | 0.7  |

**Table 2.** Effect of neck-shoulder pain (NSP) trajectory class on sick leave (days/month) and work ability (scale 0-10) over 1 year

| GEE models<br>(classes) | Sick leave |       |                |                | Work ability |       |                |                |
|-------------------------|------------|-------|----------------|----------------|--------------|-------|----------------|----------------|
|                         | p-value    | RR    | 95%CI<br>Lower | 95%CI<br>Upper | p-value      | OR    | 95%CI<br>Lower | 95%CI<br>Upper |
| <b>Model 1</b>          |            |       |                |                |              |       |                |                |
| Low NSP                 |            | 1.00  |                |                |              | 1.00  |                |                |
| Moderate NSP            | <0.001     | 3.28  | 1.89           | 5.68           | <0.001       | 2.45  | 1.87           | 3.21           |
| Strong NSP              | <0.001     | 8.98  | 4.78           | 16.89          | <0.001       | 8.64  | 6.38           | 11.69          |
| Severe NSP              | <0.001     | 17.64 | 9.36           | 33.23          | <0.001       | 15.07 | 9.94           | 22.85          |
| <b>Model 2</b>          |            |       |                |                |              |       |                |                |
| Low NSP                 |            | 1.00  |                |                |              | 1.00  |                |                |
| Moderate NSP            | <0.001     | 3.25  | 1.87           | 5.64           | <0.001       | 2.40  | 1.83           | 3.16           |
| Strong NSP              | <0.001     | 8.61  | 4.54           | 16.33          | <0.001       | 9.03  | 6.62           | 12.31          |
| Severe NSP              | <0.001     | 16.00 | 8.17           | 31.34          | <0.001       | 14.77 | 9.63           | 22.66          |
| <b>Model 3</b>          |            |       |                |                |              |       |                |                |
| Low NSP                 |            | 1.00  |                |                |              | 1.00  |                |                |
| Moderate NSP            | <0.001     | 3.11  | 1.75           | 5.52           | <0.001       | 2.43  | 1.84           | 3.20           |
| Strong NSP              | <0.001     | 7.58  | 3.91           | 14.71          | <0.001       | 8.12  | 5.91           | 11.16          |
| Severe NSP              | <0.001     | 13.83 | 6.72           | 28.49          | <0.001       | 12.93 | 8.50           | 19.67          |

Relative risk (RR) estimates with 95% confidence intervals (CI) were obtained using Generalized Estimation Equation (GEE) with a Poisson distribution for days on sick-leave (measured at 4 week intervals). Odds ratios (OR) were obtained using GEE with a multinomial distribution for work ability (measured at 12 week intervals).  
 Model 1: Unadjusted.  
 Model 2: Adjusted for age, gender and body mass index.  
 Model 3: Additionally adjusted for occupational sector (four categories, referencing administration) and physical work load.



**Table 3.** Within-person effect of temporal fluctuations in neck-shoulder pain (NSP, scale 0-10) on fluctuations in sick leave (days/month) and work ability (scale 0-10) over 1 year

| GEE models    | Sick leave |      |        |       | Work ability |      |        |       |
|---------------|------------|------|--------|-------|--------------|------|--------|-------|
|               | p-value    | RR   | 95% CI |       | p-value      | OR   | 95% CI |       |
|               |            |      | Lower  | Upper |              |      | Lower  | Upper |
| NSP intensity |            |      |        |       |              |      |        |       |
| Model 1       | 0.008      | 1.12 | 1.03   | 1.21  | 0.005        | 1.11 | 1.03   | 1.19  |
| Model 2       | 0.008      | 1.12 | 1.03   | 1.21  | 0.009        | 1.11 | 1.03   | 1.19  |
| Model 3       | 0.011      | 1.11 | 1.02   | 1.21  | 0.002        | 1.13 | 1.04   | 1.21  |

Relative risk (RR) estimates with 95% confidence intervals (CI) were obtained using Generalized Estimation Equation (GEE) with a Poisson distribution for days on sick-leave (measured at 4 week intervals). Odds ratios (OR) were obtained using GEE with a multinomial distribution for work ability (measured at 12 week intervals). Estimates indicate the within-person effect of change in pain intensity on change in sick leave and work ability per month.

Model 1: adjusted for the person mean pain intensity across time points.

Model 2: additionally adjusted for age, gender and BMI.

Model 3: additionally adjusted for occupational sector and physical work load.

## Figure legends

**Figure 1.** Mean 1-year trajectories of days on sick leave obtained in the fully adjusted model in each trajectory class of neck-shoulder pain (NSP). The x-axis represents the 14 pain ratings over 1 year. The y-axis represents the mean predicted number of days on sick leave per month.

**Figure 2.** Association between temporal fluctuations in neck-shoulder pain (NSP) and the outcomes sick leave and work ability. The x-axis represents the difference in pain intensity scores from the person mean pain intensity across time points. The y-axis represents the predicted number of days on sick leave per month (Fig. 2a) and the predicted cumulative probability of poor work ability (Fig. 2b), as defined by the cut-point  $\leq 7$  (scale 0-10)<sup>30</sup>.

## Supplemental Figures

**Supplemental Figure A.** Mean predicted intensity of neck-shoulder pain (NSP) over 1 year in the four trajectory classes of NSP obtained using Latent class growth analysis.

**Supplemental Figure B.** Mean and standard error bars of accumulated days on sick leave over 1 year in the four trajectory classes of neck-shoulder pain (NSP).

**Supplemental Figure C.** Mean and standard error for work ability averaged over 1 year in the four trajectory classes of neck-shoulder pain (NSP).

1  
2  
3  
4  
5  
6  
7  
8  
9  
10  
11  
12  
13  
14  
15  
16  
17  
18  
19  
20  
21  
22  
23  
24  
25  
26  
27  
28  
29  
30  
31  
32  
33  
34  
35  
36  
37  
38  
39  
40  
41  
42  
43  
44  
45  
46  
47  
48  
49  
50  
51  
52  
53  
54  
55  
56  
57  
58  
59  
60

For peer review only

1  
2  
3  
4  
5  
6  
7  
8  
9  
10  
11  
12  
13  
14  
15  
16  
17  
18  
19  
20  
21  
22  
23  
24  
25  
26  
27  
28  
29  
30  
31  
32  
33  
34  
35  
36  
37  
38  
39  
40  
41  
42  
43  
44  
45  
46  
47  
48  
49  
50  
51  
52  
53  
54  
55  
56  
57  
58  
59  
60

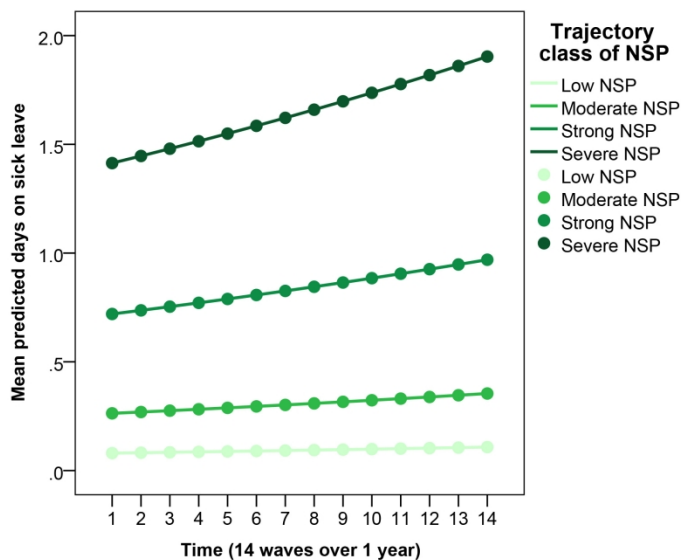

Figure 1.

Figure 1. Mean 1-year trajectories of days on sick leave obtained in the fully adjusted model in each trajectory class of neck-shoulder pain (NSP). The x-axis represents the 14 pain ratings over 1 year. The y-axis represents the mean predicted number of days on sick leave per month.

215x279mm (300 x 300 DPI)

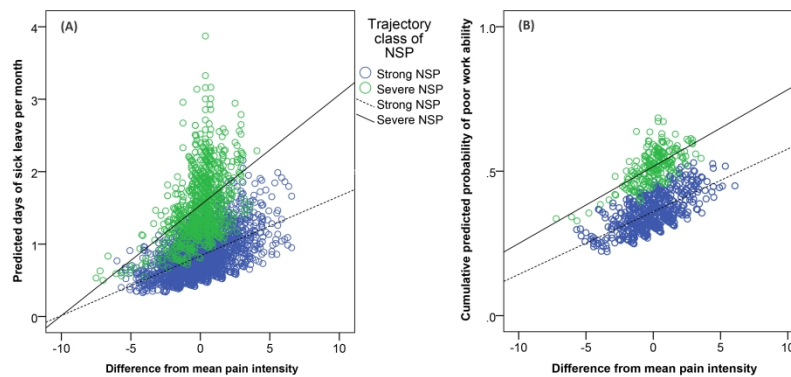

Figure 2

Figure 2. Association between temporal fluctuations in neck-shoulder pain (NSP) and the outcomes sick leave and work ability. The x-axis represents the difference in pain intensity scores from the person mean pain intensity across time points. The y-axis represents the predicted number of days on sick leave per month (Fig. 2a) and the predicted cumulative probability of poor work ability (Fig. 2b), as defined by the cut-point  $\leq 7$  (scale 0-10).

350x199mm (300 x 300 DPI)

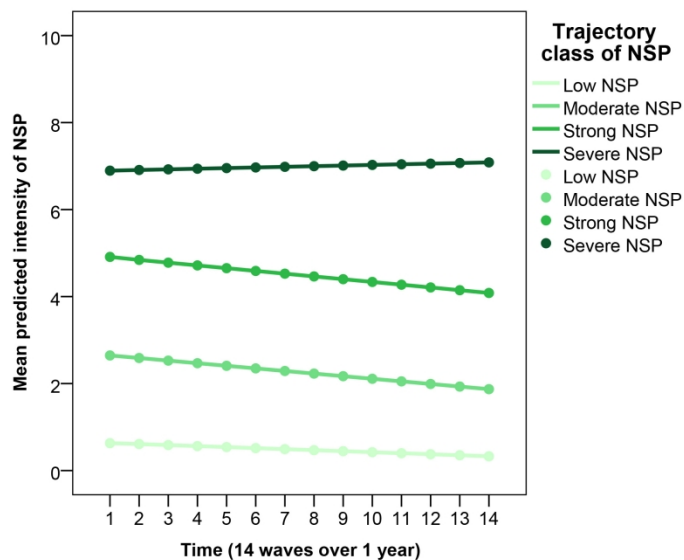

Supplemental Figure A.

Supplemental Figure A. Mean predicted intensity of neck-shoulder pain (NSP) over 1 year in the four trajectory classes of NSP obtained using Latent class growth analysis.

215x279mm (300 x 300 DPI)

1  
2  
3  
4  
5  
6  
7  
8  
9  
10  
11  
12  
13  
14  
15  
16  
17  
18  
19  
20  
21  
22  
23  
24  
25  
26  
27  
28  
29  
30  
31  
32  
33  
34  
35  
36  
37  
38  
39  
40  
41  
42  
43  
44  
45  
46  
47  
48  
49  
50  
51  
52  
53  
54  
55  
56  
57  
58  
59  
60

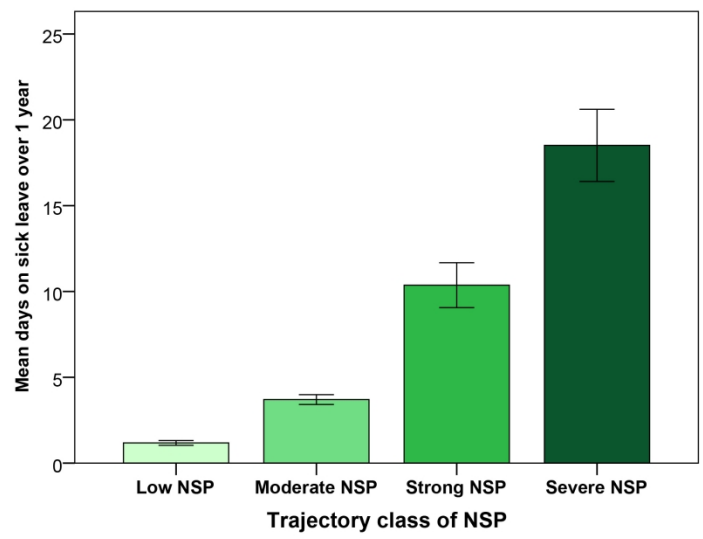

Supplemental Figure B.

Supplemental Figure B. Mean and standard error bars of accumulated days on sick leave over 1 year in the four trajectory classes of neck-shoulder pain (NSP).

215x279mm (300 x 300 DPI)

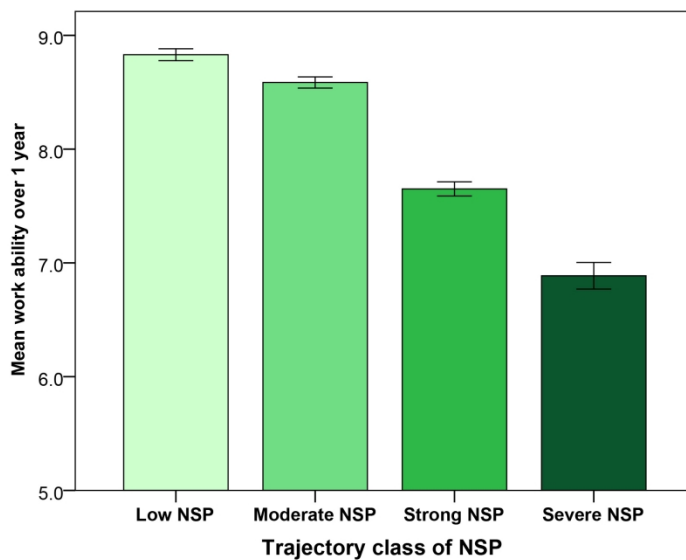

Supplemental Figure C.

Supplemental Figure C. Mean and standard error for work ability averaged over 1 year in the four trajectory classes of neck-shoulder pain (NSP).

215x279mm (300 x 300 DPI)



## STROBE Statement—checklist of items that should be included in reports of observational studies

|                              | Item No | Recommendation                                                                                                                                                                                                                                                                                                                                                                                                                                                         | Check yes/no                                        |
|------------------------------|---------|------------------------------------------------------------------------------------------------------------------------------------------------------------------------------------------------------------------------------------------------------------------------------------------------------------------------------------------------------------------------------------------------------------------------------------------------------------------------|-----------------------------------------------------|
| Title and abstract           | 1       | (a) Indicate the study's design with a commonly used term in the title or the abstract                                                                                                                                                                                                                                                                                                                                                                                 | yes                                                 |
|                              |         | (b) Provide in the abstract an informative and balanced summary of what was done and what was found                                                                                                                                                                                                                                                                                                                                                                    | yes                                                 |
| <b>Introduction</b>          |         |                                                                                                                                                                                                                                                                                                                                                                                                                                                                        |                                                     |
| Background/rationale         | 2       | Explain the scientific background and rationale for the investigation being reported                                                                                                                                                                                                                                                                                                                                                                                   | yes, p4-5                                           |
| Objectives                   | 3       | State specific objectives, including any prespecified hypotheses                                                                                                                                                                                                                                                                                                                                                                                                       | yes, p5                                             |
| <b>Methods</b>               |         |                                                                                                                                                                                                                                                                                                                                                                                                                                                                        |                                                     |
| Study design                 | 4       | Present key elements of study design early in the paper                                                                                                                                                                                                                                                                                                                                                                                                                | yes, p5                                             |
| Setting                      | 5       | Describe the setting, locations, and relevant dates, including periods of recruitment, exposure, follow-up, and data collection                                                                                                                                                                                                                                                                                                                                        | yes, p5                                             |
| Participants                 | 6       | (a) <i>Cohort study</i> —Give the eligibility criteria, and the sources and methods of selection of participants. Describe methods of follow-up<br><i>Case-control study</i> —Give the eligibility criteria, and the sources and methods of case ascertainment and control selection. Give the rationale for the choice of cases and controls<br><i>Cross-sectional study</i> —Give the eligibility criteria, and the sources and methods of selection of participants | a) yes, p5                                          |
|                              |         | (b) <i>Cohort study</i> —For matched studies, give matching criteria and number of exposed and unexposed<br><i>Case-control study</i> —For matched studies, give matching criteria and the number of controls per case                                                                                                                                                                                                                                                 |                                                     |
| Variables                    | 7       | Clearly define all outcomes, exposures, predictors, potential confounders, and effect modifiers. Give diagnostic criteria, if applicable                                                                                                                                                                                                                                                                                                                               | yes, p6-7                                           |
| Data sources/<br>measurement | 8*      | For each variable of interest, give sources of data and details of methods of assessment (measurement). Describe comparability of assessment methods if there is more than one group                                                                                                                                                                                                                                                                                   | yes, p6-7                                           |
| Bias                         | 9       | Describe any efforts to address potential sources of bias                                                                                                                                                                                                                                                                                                                                                                                                              | yes, p7-8<br>(confounders and statistical analyses) |
| Study size                   | 10      | Explain how the study size was arrived at                                                                                                                                                                                                                                                                                                                                                                                                                              | yes, p5 (flow)                                      |
| Quantitative variables       | 11      | Explain how quantitative variables were handled in the analyses. If applicable, describe which groupings were chosen and why                                                                                                                                                                                                                                                                                                                                           | yes, p7-8                                           |
| Statistical methods          | 12      | (a) Describe all statistical methods, including those used to control for confounding                                                                                                                                                                                                                                                                                                                                                                                  | yes p7-8                                            |

1  
2 (b) Describe any methods used to examine subgroups and interactions yes, p7-8  
3

---

4 (c) Explain how missing data were addressed yes, p7  
5

---

6 (d) *Cohort study*—If applicable, explain how loss to follow-up was addressed yes, p7  
7

8 *Case-control study*—If applicable, explain how matching of cases and controls was addressed  
9

10 *Cross-sectional study*—If applicable, describe analytical methods taking account of sampling strategy  
11

---

12 (e) Describe any sensitivity analyses  
13

14 Continued on next page  
15  
16  
17  
18  
19  
20  
21  
22  
23  
24  
25  
26  
27  
28  
29  
30  
31  
32  
33  
34  
35  
36  
37  
38  
39  
40  
41  
42  
43  
44  
45  
46  
47  
48  
49  
50  
51  
52  
53  
54  
55  
56  
57  
58  
59  
60

| <b>Results</b>           |     |                                                                                                                                                                                                                                                                                                                                                                                                               | <b>Yes/no</b>                   |
|--------------------------|-----|---------------------------------------------------------------------------------------------------------------------------------------------------------------------------------------------------------------------------------------------------------------------------------------------------------------------------------------------------------------------------------------------------------------|---------------------------------|
| Participants             | 13* | (a) Report numbers of individuals at each stage of study—eg numbers potentially eligible, examined for eligibility, confirmed eligible, included in the study, completing follow-up, and analysed<br>(b) Give reasons for non-participation at each stage<br>(c) Consider use of a flow diagram                                                                                                               | Yes, p7                         |
| Descriptive data         | 14* | (a) Give characteristics of study participants (eg demographic, clinical, social) and information on exposures and potential confounders<br>(b) Indicate number of participants with missing data for each variable of interest<br>(c) <i>Cohort study</i> —Summarise follow-up time (eg, average and total amount)                                                                                           | Yes, p9<br>Yes, p9              |
| Outcome data             | 15* | <i>Cohort study</i> —Report numbers of outcome events or summary measures over time<br><i>Case-control study</i> —Report numbers in each exposure category, or summary measures of exposure<br><i>Cross-sectional study</i> —Report numbers of outcome events or summary measures                                                                                                                             | yes, Table 1                    |
| Main results             | 16  | (a) Give unadjusted estimates and, if applicable, confounder-adjusted estimates and their precision (eg, 95% confidence interval). Make clear which confounders were adjusted for and why they were included<br>(b) Report category boundaries when continuous variables were categorized<br>(c) If relevant, consider translating estimates of relative risk into absolute risk for a meaningful time period | Yes, tables 2-3<br>n/a          |
| Other analyses           | 17  | Report other analyses done—eg analyses of subgroups and interactions, and sensitivity analyses                                                                                                                                                                                                                                                                                                                | statistical methods and results |
| <b>Discussion</b>        |     |                                                                                                                                                                                                                                                                                                                                                                                                               |                                 |
| Key results              | 18  | Summarise key results with reference to study objectives                                                                                                                                                                                                                                                                                                                                                      | yes, p15                        |
| Limitations              | 19  | Discuss limitations of the study, taking into account sources of potential bias or imprecision. Discuss both direction and magnitude of any potential bias                                                                                                                                                                                                                                                    | yes, p17                        |
| Interpretation           | 20  | Give a cautious overall interpretation of results considering objectives, limitations, multiplicity of analyses, results from similar studies, and other relevant evidence                                                                                                                                                                                                                                    | yes, p18                        |
| Generalisability         | 21  | Discuss the generalisability (external validity) of the study results                                                                                                                                                                                                                                                                                                                                         | yes, p18                        |
| <b>Other information</b> |     |                                                                                                                                                                                                                                                                                                                                                                                                               |                                 |
| Funding                  | 22  | Give the source of funding and the role of the funders for the present study and, if applicable, for the original study on which the present article is based                                                                                                                                                                                                                                                 | yes, p18                        |

\*Give information separately for cases and controls in case-control studies and, if applicable, for exposed and unexposed groups in cohort and cross-sectional studies.

**Note:** An Explanation and Elaboration article discusses each checklist item and gives methodological background and published examples of transparent reporting. The STROBE checklist is best used in conjunction with this article (freely available on the Web sites of PLoS Medicine at <http://www.plosmedicine.org/>, Annals of Internal Medicine at

1  
2 <http://www.annals.org/>, and Epidemiology at <http://www.epidem.com/>). Information on the STROBE Initiative is  
3 available at [www.strobe-statement.org](http://www.strobe-statement.org).  
4  
5  
6  
7  
8  
9  
10  
11  
12  
13  
14  
15  
16  
17  
18  
19  
20  
21  
22  
23  
24  
25  
26  
27  
28  
29  
30  
31  
32  
33  
34  
35  
36  
37  
38  
39  
40  
41  
42  
43  
44  
45  
46  
47  
48  
49  
50  
51  
52  
53  
54  
55  
56  
57  
58  
59  
60

# BMJ Open

## Longitudinal trajectories of neck–shoulder pain in workers: Influence on sick leave and work ability over 1 year

|                                 |                                                                                                                                                                                                                                                                                                                                                                                                               |
|---------------------------------|---------------------------------------------------------------------------------------------------------------------------------------------------------------------------------------------------------------------------------------------------------------------------------------------------------------------------------------------------------------------------------------------------------------|
| Journal:                        | <i>BMJ Open</i>                                                                                                                                                                                                                                                                                                                                                                                               |
| Manuscript ID                   | bmjopen-2018-022006.R1                                                                                                                                                                                                                                                                                                                                                                                        |
| Article Type:                   | Research                                                                                                                                                                                                                                                                                                                                                                                                      |
| Date Submitted by the Author:   | 19-Jun-2018                                                                                                                                                                                                                                                                                                                                                                                                   |
| Complete List of Authors:       | Hallman, David; University of Gävle, Centre for Musculoskeletal Research<br>Holtermann, Andreas; National Research Centre for the Working Environment,<br>Dencker-Larsen, Sofie; National Research Centre for the Working Environment<br>Birk Jørgensen, Marie; National Research Centre for the Working Environment<br>Nørregaard Rasmussen, Charlotte; National Research Centre for the Working Environment |
| <b>Primary Subject Heading</b>: | Occupational and environmental medicine                                                                                                                                                                                                                                                                                                                                                                       |
| Secondary Subject Heading:      | Public health                                                                                                                                                                                                                                                                                                                                                                                                 |
| Keywords:                       | Chronic pain, LCGA, Neck pain, Occupational, Pain trajectories                                                                                                                                                                                                                                                                                                                                                |
|                                 |                                                                                                                                                                                                                                                                                                                                                                                                               |

SCHOLARONE™  
Manuscripts

1  
2  
3 **Title: Are trajectories of neck–shoulder pain associated with sick**  
4 **leave and work ability in workers? A one-year prospective study**  
5  
6

7 Authors: David M Hallman<sup>1\*</sup>, Andreas Holtermann<sup>2,3</sup>, Sofie Dencker-Larsen<sup>2</sup>, Marie Birk  
8 Jørgensen<sup>2</sup>, Charlotte Diana Nørregaard Rasmussen<sup>2</sup>  
9  
10

11 Affiliations:  
12

13 <sup>1</sup>Centre for Musculoskeletal Research, Department of Occupational and Public Health  
14 Sciences, University of Gävle, Gävle, Sweden  
15

16 <sup>2</sup>National Research Centre for the Working Environment, Copenhagen, Denmark  
17

18 <sup>3</sup>Department of Sports Science and Clinical Biomechanics, University of Southern Denmark,  
19 Odense, Denmark  
20  
21

22 \*Corresponding author:  
23

24 David M Hallman, University of Gävle, Kungsbäcksvägen 47, 80176 Gävle, Sweden; Email:  
25 [david.hallman@hig.se](mailto:david.hallman@hig.se); Phone: +46 736266413  
26  
27

28 Funding: The study was supported by grants from the Danish government (Satspulje) and the  
29 Swedish Research Council for Health, Working Life and Welfare (Forte Dnr.2009–1761).  
30  
31

32 Conflict of interest: None to declare.  
33  
34

35 Author contributions:  
36

37 DMH contributed to the statistical data analyses and drafting of the manuscript. AH and MBJ  
38 contributed to the conception, design, data collection and funding of the full DPHACTO  
39 study. All authors (DMH, AH, SDL, MBJ, and CDNR) contributed to the conception of this  
40 study, discussed the results and commented on the manuscript.  
41  
42  
43  
44  
45  
46

47 Data sharing statement:  
48

49 Additional data can be accessed on request by email ([aho@arbejdsmiljoforskning.dk](mailto:aho@arbejdsmiljoforskning.dk)).  
50  
51

52 The manuscript contains about 4300 words, 3 tables, 2 figures, and 1 Supplemental figure.  
53  
54  
55  
56  
57  
58  
59  
60

## Abstract

### Objectives

The study aimed to determine the extent to which latent trajectories of neck-shoulder pain (NSP) are associated with self-reported sick leave and work ability based on frequent repeated measures over 1 year in an occupational population.

### Methods

This longitudinal study included 748 Danish workers (blue-collar, n=620; white collar, n=128). A questionnaire was administered to collect data on personal and occupational factors at baseline. Text messages were used for repeated measurements of NSP intensity (scale 0-10) over 1 year (14 waves in total). Simultaneously, self-reported sick leave (days/month) due to pain was assessed at four week intervals, while work ability (scale 0-10) was assessed using a single item (work ability index) at 12 week intervals over the year. Trajectories of NSP, distinguished by latent class growth analysis (LCGA), were used as predictors of sick leave and work ability in generalized estimation equations with multiple adjustments.

### Results

Sick leave increased and work ability decreased across all NSP trajectory classes (low, moderate, strong fluctuating, and severe persistent pain intensity). In the adjusted model, the estimated number of days on sick leave was nearly 14 times larger for severe persistent NSP (RR=13.8, 95% CI 6.7–28.5; estimated mean 1.5 days/month) compared with low NSP (mean 0.1 days/month). Similarly, the likelihood of reduced work ability was nearly 13 times larger for severe persistent NSP (OR=12.9, CI 8.5–19.7; median 7.1) compared with low NSP (median 9.5).

### Conclusion

Severe persistent NSP was strongly associated with sick leave and poor work ability over 1 year among workers. LCGA can be useful to distinguish important target groups in future observational/intervention studies on NSP.

**Keywords:** Chronic pain; LCGA; Neck pain; Occupational; Pain trajectories

### Strengths and limitations of this study

- Some of the strengths of this study are:
  - Frequent repeated assessment of neck-shoulder pain, sick leave and work ability over 1 year.
  - High response rate during each month of follow-up.
- One of the limitations of this study was that sick leave was measured using self-report.

For peer review only



## Introduction

Neck-shoulder pain (NSP) is a common condition, with annual prevalence rates between 27% and 48% in different working populations.<sup>1</sup> NSP is one of the leading causes of years lived with disability worldwide,<sup>2</sup> and is associated with reduced work ability<sup>3</sup> and high sick leave rates.<sup>4,5</sup> In workers with NSP, 20% had at least one spell of sick leave in one year.<sup>4</sup> Sick leave risks are higher in workers with more severe NSP intensity.<sup>6</sup> The economic burden of NSP on organizations and society is considerable.<sup>7-9</sup> The estimated total cost of neck pain in The Netherlands in 1996 was 686 million US dollars,<sup>7</sup> and the estimated total cost of both neck and back pain in Sweden in 2001 was 1% of the gross national product (GNP).<sup>9</sup>

NSP is considered a heterogeneous condition ranging from very mild symptoms to severe chronic pain<sup>10</sup> with a substantial individual variability in progression over time.<sup>11-13</sup> This heterogeneity may, however, comprise homogenous sub-populations with distinct patterns of pain, unique risk factors and different underlying pathophysiology.<sup>14</sup> Revealing such sub-populations is likely important for early identification, establishing risk factors, and improving prevention and treatment.<sup>15</sup> However, most existing studies have been conducted on patients with low back pain, e.g.,<sup>15-17</sup> while studies identifying and describing the patterns of NSP in working populations with a wide range of pain severities are sparse. Also, there is a lack of research on the predictive value of NSP sub-populations; which is crucial for understanding the extent to which NSP sub-populations are of clinical and occupational relevance regarding intervention and treatment. Thus, it is important for research and occupational and clinical practice to distinguish sub-populations of workers with different trajectories of NSP (e.g. severity, temporal variability and time course) while assessing their predictive value against core prognostic outcomes, such as sick leave and work ability.<sup>4,18,19</sup>

Work ability, as defined as the balance between human resources and work demands,<sup>20</sup> is determined by multiple factors.<sup>21</sup> The perception of poor work ability is associated with sick leave and early retirement.<sup>22</sup> Sick leave due to pain is likely multifactorial, and several personal and work related (physical and psychosocial) factors have been identified as potential determinants of increased risks.<sup>4,19,23,24</sup> High physical workload is associated with poor workability and occurrence of sick leave due to pain,<sup>4,25</sup> and may hamper return to work.<sup>23</sup> Thus, the level of physical workload is a potential moderator of the relationship of NSP trajectories with work ability and sick leave.

1  
2  
3  
4 Most previous studies on the prognosis of NSP have relied only on few measurements in time  
5 interspersed by long intervals, e.g. years.<sup>11 26</sup> Such studies are not designed to capture the  
6 detailed time course (trajectory) or temporal fluctuations in NSP (e.g. between weeks or  
7 months). In contrast, frequent repeated measurements of pain facilitate accurate and precise  
8 identification of individual pain trajectories<sup>27</sup> and minimize recall bias.<sup>28</sup>  
9  
10  
11  
12  
13

14 Latent class growth analysis (LCGA) is a common statistical approach for identifying  
15 homogenous sub-populations (latent classes) based on individual growth parameters (i.e.  
16 intercept, slope and residual variance) in repeated measures data.<sup>29</sup> We have previously used  
17 LCGA to distinguish trajectory classes of NSP among workers based on frequent repeated  
18 measurements of NSP over 1 year<sup>30</sup> We identified six distinct trajectories of NSP ranging  
19 from “asymptomatic” (prevalence 11%) to “severe persistent NSP” (9%). Several personal  
20 and occupational factors, as well as symptom characteristics at baseline predicted trajectory  
21 class membership. However, understanding the occupational and clinical relevance of  
22 trajectories of NSP requires a determination of their predictive value against core  
23 occupational and clinical outcomes. Particularly, identifying NSP trajectories associated with  
24 unfavorable outcomes would likely aid targeted prevention and treatment.  
25  
26  
27  
28  
29  
30  
31  
32  
33

34 The aim of this study is to determine the extent to which latent trajectories of NSP are  
35 associated with self-reported sick leave due to musculoskeletal pain and work ability based on  
36 frequent repeated measures over 1 year in an occupational population. A second aim is to  
37 investigate the temporal association (within person) between fluctuations in NSP and the  
38 outcomes sick leave and work ability.  
39  
40  
41  
42  
43

## 44 **Methods**

### 45 **Study design**

46 This is a prospective study using data from the Danish Physical activity cohort with objective  
47 measurements (DPhacto). The study protocol for the cohort is reported in detail elsewhere.<sup>31</sup>  
48 Data collection took place from April 2012 to May 2014 at 15 Danish companies, including  
49 workers in four occupational sectors (cleaning, manufacturing, transportation and office  
50 work/administration). The initial contact and recruitment of companies were performed in  
51  
52  
53  
54  
55  
56  
57  
58  
59  
60

1  
2  
3 collaboration with a large Danish union. The companies were selected to represent blue-collar  
4 occupations with different levels of physical demands at work.  
5

6  
7 Baseline data collection consisted of a brief web-based questionnaire, a standard health  
8 examination and objective diurnal measurements of physical activity and heart rate (presented  
9 elsewhere.<sup>32 33</sup> Prospective self-reported data on musculoskeletal pain, sick leave due to pain  
10 and work ability was collected repeatedly over 12 months using text messages.  
11  
12  
13

### 14 15 **Study population**

16 The inclusion criterion for participation was current employment within any of the recruited  
17 work places. Exclusion criteria were holding a managing position or being pregnant or a  
18 student/trainee. In addition, workers not responding to the baseline questionnaire and/or the  
19 prospective measurements were excluded.  
20  
21  
22  
23

24  
25 Among the 2107 invited workers, 1119 agreed to participate and 32 of them were excluded  
26 due to holding a managing position (n=17) or being pregnant (n=2) or a student/trainee  
27 (n=13). Of the remaining 1087 eligible workers, 782 responded to the questionnaire and 748  
28 took part in the prospective measurements from baseline. Thus, the final study sample  
29 consisted of 748 workers (blue-collar, n=620; white collar, n=128). Descriptive characteristics  
30 of the study population are shown in Table 1.  
31  
32  
33  
34

35  
36 All participants provided their written informed consent prior to participation. The present  
37 study was conducted according to the Declaration of Helsinki, approved by the Danish Data  
38 Protection Agency, and evaluated by the Regional Ethics Committee in Copenhagen,  
39 Denmark (H-2-2012-011).  
40  
41  
42  
43

### 44 45 **Repeated assessment using text messages**

46 Text messages (SMS) were used to assess self-reported pain intensity in the neck-shoulder  
47 region, days on sick leave and work ability using the commercial software “SMS-Track”  
48 (<https://sms-track.com/>). Starting at baseline, data on NSP and sick leave were collected at  
49 four week intervals (14 waves), while data on work ability were collected at 12 week intervals  
50 (4 waves in total) during the 1-year study. The SMS were sent on Sundays, with a reminder  
51 the following day.  
52  
53  
54  
55  
56  
57  
58  
59  
60

### Neck-shoulder pain

Pain intensity in the neck-shoulder region (NSP) the past month was assessed using an 11-point numeric rating scale (NRS), which ranges from 0 (“no pain”) to 10 (“worst pain imaginable”). The worker responded to the question “*rate the worst pain you have experienced in your neck/shoulders within the past month?*” The NRS is a reliable and valid instrument for assessing pain intensity<sup>34</sup> and is recommended as an outcome in clinical trials.<sup>35</sup>

### Sick leave

Sick-leave due to pain was assessed using a single-item from the validated Outcome Evaluation Questionnaire<sup>36</sup>: “*Within the past month, how many days have you been absent from work due to pain in muscles or joints?*” with response categories ranging from 0 to 31 days. Based on a recent meta-analysis, self-reported sick leave demonstrates good test-retest reliability and reasonably high convergent validity against records.<sup>37</sup>

### Work ability

Work ability was assessed using a validated single item<sup>22</sup> from the work ability index.<sup>38</sup> The worker responded to the question “*Please rate your present work ability?*” with response categories ranging from 0 (unable to work) to 10 (“work ability as its best”). A score  $\leq 7$  denotes poor work ability.<sup>39</sup>

### Assessment of possible confounders and effect modifiers

Theoretical assumptions and empirical evidence were used to select possible confounders and effect modifiers which were accounted for in the statistical analyses. The following variables were measured at baseline as previously described<sup>30</sup>: age (years,) and gender (male or female) based on civil registration number, body mass index (BMI) based on objectively measured height and weight, occupational sector (manufacturing, cleaning, transportation, and administration/office work within the same workplaces), and seniority in the current job (years). Physical work load was measured by the question “*How physically demanding do you normally consider your present work?*” using a ten-point (1-10) response scale modified from Borg,<sup>40</sup> with higher values indicating higher physical demands. Multisite pain was measured based on the Standardized Nordic questionnaire for the analysis of musculoskeletal symptoms<sup>41</sup> asking about pain intensity (NRS, scale 0-10) during the past three months in

1  
2  
3 seven different anatomical areas (i.e. neck/shoulders, elbows, hands/wrists, lower back, hips,  
4 knees, and feet/ankles). A cut-point of >2 was used to indicate the occurrence of pain,  
5 whereby the number of pain sites was determined.<sup>42</sup> Since the relationship between NSP, sick  
6 leave and work ability may depend on the level of physical demands at work, physical work  
7 load was considered both a confounder and an effect modifier, while the other variables were  
8 solely included as possible confounders.  
9  
10  
11  
12  
13

### 14 **Statistical analyses**

15 Growth trajectories (latent classes) of the intensity in NSP were identified using LCGA in  
16 Latent Gold version 5.1 (Statistical innovations Belmont, MA). The LCGA procedure and the  
17 resulting trajectory classes of NSP are described in detail elsewhere.<sup>30</sup> In brief, the LCGA  
18 assigns individuals to latent classes based on probabilities. That is, using growth parameters  
19 (i.e. intercept, slope and residual variance) reflecting change over time, LCGA assigns  
20 individuals to latent classes (categorical variable) assuming homogeneity within class and  
21 heterogeneity between classes.<sup>29</sup>  
22  
23  
24  
25  
26  
27  
28

29 The LCGA models were performed using Time (14 waves over 1 year) as a continuous  
30 predictor and NSP intensity as a continuous dependent variable. Missing values were  
31 considered as missing at random and included in all models without imputations. The optimal  
32 number of classes was determined based on appropriate model fit indices, i.e. Bayesian  
33 information criterion (BIC), Entropy and Boot strap log likelihood ratio (BLRT), which were  
34 obtained in consecutive LCGA models with 1-10 a priori class solutions. Then, the models  
35 were evaluated based on the estimated growth parameters and clinical distinction between the  
36 identified classes. The identified trajectories of NSP were used as an independent variable in  
37 further statistical analyses of associations with sick leave and work ability over the same year.  
38  
39  
40  
41  
42  
43  
44

45 The effect of NSP trajectories on sick leave (SMS at four week intervals over 1 year) and  
46 work ability (SMS each quarter) during the same year were determined using Generalized  
47 Estimation Equation (GEE) regression modeling with an auto regressive first order (AR1)  
48 covariance structure.  
49  
50  
51

52 The effect of NSP trajectories on sick-leave (days/month) was tested using GEE with a  
53 Poisson distribution and a log link function. Fixed factors were NSP trajectory class  
54 (categorical variable) and time (continuous variable, 14 time points). The primary GEE  
55  
56  
57  
58  
59  
60

1  
2  
3 models were constructed in three steps: (model 1) unadjusted, (model 2) adjusted for age,  
4 gender and BMI, and (model 3) additionally adjusted for occupational sector (four categories)  
5 and physical work load (continuous variable). To test the robustness of the primary models,  
6 secondary models were estimated with additional adjustment for the intensity of NSP (model  
7 4) and the number of pain regions (model 5) at baseline (past three months). Finally, to test  
8 for potential effect modification by physical work load, model 3 was re-run with an  
9 interaction between NSP trajectory class and physical work load (model 6).  
10  
11  
12  
13  
14

15  
16 The effect of NSP trajectory class on work ability (dependent variable, ordinal scale) was  
17 tested using GEE regression modeling with a multinomial distribution and a cumulative logit  
18 link function. Fixed factors were NSP trajectory class (categorical variable) and time  
19 (continuous variable, 4 time points). The models were constructed with and without  
20 adjustment for covariates, as explained above.  
21  
22  
23  
24

25  
26 Additional GEE models were constructed to investigate the within person effect of temporal  
27 fluctuations in the intensity of NSP on fluctuations in sick leave and work ability. To partition  
28 the within and between subjects variances in the predictor (intensity of NSP), the mean pain  
29 intensity score across all time points was determined for each individual. Then, the person  
30 mean pain score was subtracted from each repeated pain rating and used as an independent  
31 variable (within subject effect), while adjusting for the person mean pain as a covariate  
32 (between subjects effect).<sup>43</sup> Thus, these GEE models were constructed with three fixed  
33 factors: (i) time (14 waves), (ii) the person mean pain intensity across waves, and (iii) the  
34 difference from the mean pain intensity (within subject effect). Model specifications for sick  
35 leave and work ability were the same as above. The models were estimated with and without  
36 adjustment for potential confounders as explained above.  
37  
38  
39  
40  
41  
42  
43  
44

45  
46 The regression models were estimated using SPSS software version 22 (IBM, USA). For each  
47 model, we derived the exponential estimate, i.e. relative risk (RR) and odds ratio (OR) for  
48 sick leave and work ability, respectively, and 95% confidence intervals (CI). P-values <0.05  
49 were considered significant.  
50  
51  
52

### 53 **Patient and public involvement**

54  
55  
56  
57  
58  
59  
60

No patients or public were directly involved in setting the research questions and outcomes, design and conduct of this study, or interpretation of the results. Results will be disseminated to the participants at <http://www.nfa.dk/>.

## Results

### Characteristics of the study population

Characteristics of the study population are shown in Table 1. The study sample consisted of both males and females, and most were blue-collar workers. The workers were on average of middle age, slightly overweight, and had been in their current job for 14 years. The mean intensity of NSP across all time points was 2.6 (scale 0-10). Most of the workers rated high work ability (>7, scale 0-10) across the study period, while the average worker accumulated 6 days on sick leave due to pain over 1 year, although with a considerable dispersion between individuals. Compliance to the repeated measurements (SMS) in the study was high; on average, the workers had 1.2 missing responses to pain and sick leave (14 waves) and 0.4 missing responses to work ability (4 waves) (Table 1).

[Insert Table 1 about here]

### Identified latent trajectories of NSP

Based on model fit indices (BIC, Entropy and BLRT) and distinction between classes obtained from consecutive LCGA models, a six-class solution was chosen.<sup>30</sup> The growth pattern and prevalence (%) of the six identified trajectory classes of NSP were characterized as follows (see also Supplemental Figure A): class 1, *asymptomatic* (11%); class 2, *very low NSP* (10%); class 3, *low recovering NSP* (18%); class 4, *moderate fluctuating NSP* (28%); class 5, *strong fluctuating NSP* (24 %); and class 6, *severe persistent NSP* (9%). The trajectory classes with lower intensities of NSP (classes 1-3) did not differ in total days on sick leave (One-way ANOVA:  $p=0.32$ ) or mean work ability (One way ANOVA:  $p=0.27$ ) over 1 year; and the occurrence of sick leave was very low, while work ability was high across the three classes. Thus, classes 1-3 were merged into a single category (low NSP 39%), which was used as a reference in further analyses.



### **Effect of NSP trajectory classes on sick leave over 1 year**

Poisson regression estimates of the effect of NSP trajectories on sick leave due to pain (days/month) are shown in Table 2. There was no significant time effect on sick leave (unadjusted RR=1.02, 95%CI 0.99-1.06). Thus, the interaction between NSP trajectory class and time was discarded from the models.

Based on the fully adjusted model (Table 2, model 3) referencing low NSP, the relative risk of sick leave increased for moderate (RR=3.1, 95%CI 1.8–5.5), strong fluctuating (RR=7.6, 95%CI 3.9–14.7), and severe persistent NSP (RR=13.8, 95%CI 6.7–28.5). The estimated number of days on sick leave per month was nearly 14 times higher in those with severe persistent NSP compared with low NSP. On average, the mean predicted estimates across 14 waves were 0.0 days/month (low NSP), 0.3 days/month (moderate NSP), 0.8 days/month (strong NSP), and 1.5 days/month (severe persistent NSP). Predicted values of sick leave for each wave over 1 year are shown in Figure 1.

Additional adjustment for multisite pain showed similar estimates for moderate NSP (RR=3.0, 95%CI 1.7–5.4), strong fluctuating NSP (RR=7.2, 95%CI 3.5–14.5) and severe persistent NSP (RR=13.1, 95%CI 6.1–28). Also, adjustment for baseline pain intensity revealed stronger estimates for moderate NSP (RR=3.7, 95%CI 2.1–6.8), strong fluctuating NSP (RR=10.9, 95%CI 5.1–23.7) and severe persistent NSP (RR=24.5, 95%CI 10.4–57.9), although with wider CIs.

There was no significant interaction between NSP trajectory class and physical work load on sick leave.

[Insert Figure 1 about here]

### **Effect of trajectories of NSP on work ability over 1 year**

The ordinal regression estimates of the effect of trajectories of NSP on work ability (measured each quarter) are shown in Table 2.



1  
2  
3 There was a small time effect indicating reduced work ability over the year (unadjusted OR  
4 1.05, 95%CI 0.99–1.11). There was no interaction between NSP trajectory class and time,  
5 whereby this interaction was discarded from the model.  
6  
7

8 NSP trajectory class was inversely associated with work ability (Table 2). Based on the fully  
9 adjusted model referencing low NSP (Table 2, model 3), the likelihood of a 1-unit reduction  
10 in work ability increased for moderate (OR=2.4, 95%CI 1.8–3.2), strong fluctuating (OR=8.1,  
11 95%CI 5.9–11.2), and severe persistent NSP (OR=12.9, 95%CI 8.5–19.7). The median scores  
12 (IQR) of work ability during the year were 9.5(1.7) for low NSP, 9.0(2.0) for moderate NSP,  
13 7.8(2.0) for strong NSP, and 7.1(2.5) for severe persistent NSP.  
14  
15  
16  
17

18 Additional adjustment for multisite pain showed slightly weaker estimates for moderate NSP  
19 (OR=2.2, 95%CI 1.7–2.9), strong fluctuating NSP (OR=6.4, 95%CI 4.6–9.0) and severe  
20 persistent NSP (OR=10.4, 95%CI 6.7–16.0). Further, adjustment for baseline pain intensity  
21 showed similar estimates for moderate NSP (OR=2.6, 95%CI 1.9–3.5), strong fluctuating  
22 NSP (OR=9.1, 95%CI 6.3–13.1) and severe persistent NSP (OR=15.4, 95%CI 9.3–25.5).  
23  
24  
25  
26

27 There was no significant interaction between NSP trajectory class and physical work load on  
28 work ability.  
29  
30  
31  
32

33 [Insert Table 2 about here]  
34  
35  
36  
37  
38

### 39 **Within-person effect of NSP on sick leave and workability**

40  
41 The within-person temporal effects of pain intensity on sick leave due to pain and work ability  
42 are shown in Table 3. Due to the high work ability scores and low prevalence of sick leave in  
43 the classes with lower intensities of NSP, these analyses included only workers assigned to  
44 the trajectory classes strong fluctuating and severe persistent NSP (n=248).  
45  
46  
47  
48

49 Within person fluctuations in the intensity of NSP were positively associated with fluctuations  
50 in sick leave (adjusted RR=1.11, 95%CI 1.02–1.21). That is, higher intensity of NSP was  
51 associated with more days of sick leave during a particular month at the individual level  
52 (Table 3 and Figure 2a).  
53  
54  
55  
56  
57  
58  
59  
60

1  
2  
3 A similar within-person association was found between fluctuations in pain intensity and  
4 work ability (adjusted OR 1.13, 95%CI 1.04–1.21). For example, increasing intensity of NSP  
5 was associated with higher probabilities of reduced work ability (Table 3). This association is  
6 illustrated in Figure 2b as the estimated probability of reporting poor work ability ( $\leq 7$  on the  
7 0-10 scale).<sup>39</sup>  
8  
9  
10

11  
12  
13  
14 [Insert Table 3 about here]

15  
16 [Insert Figure 2]  
17  
18  
19  
20  
21  
22  
23  
24  
25  
26  
27  
28  
29  
30  
31  
32  
33  
34  
35  
36  
37  
38  
39  
40  
41  
42  
43  
44  
45  
46  
47  
48  
49  
50  
51  
52  
53  
54  
55  
56  
57  
58  
59  
60

## Discussion

In summary, this prospective study investigated the relationship between LCGA-based trajectories of NSP and the outcomes sick leave and work ability. We found that the distinguished trajectory classes of NSP were strongly associated with sick leave due to pain and poor work ability over 1 year, and that the temporal fluctuations in pain intensity predicted fluctuations in sick leave and work ability at the individual level.

To our knowledge, this study is unique in assessing the association between LCGA-based trajectories of NSP and important prognostic outcomes among workers. A clear strength of the study is the use of frequent prospective measures of both exposure (intensity of NSP) and outcomes (work ability and sick leave) over 1 year. The high response rate to the SMS is also a strength supporting the feasibility of this method to obtain frequent repeated measurements of pain in future studies on the prognosis of NSP.

### Trajectories of NSP, sick leave and work ability

The trajectory classes of NSP used in this study were distinguished using LCGA, resulting in six distinct trajectories of NSP.<sup>30</sup> This corroborates a study by Lövgren et al. (2014) which used Growth Mixture Modeling to identify six trajectory classes of NSP in nursing students entering working life. In contrast, the severity of NSP in the current sample of workers was much higher, perhaps due to the large proportion of blue-collar workers in this study.<sup>1</sup> The high prevalence of strong fluctuating (24%) and severe persistent NSP (9%), with mean pain intensities of 5 and 7 (scale 0-10), respectively, is noteworthy.

Trajectory class of NSP was strongly associated with the number of days on sick leave over the 1 year study period. Particularly, the fully adjusted model indicated a relative risk of sick leave 14 times higher in the trajectory class with severe persistent NSP (mean 1.5 days/month), compared with low NSP (mean 0.0 days/month). This result is in line with previous prospective studies showing a positive association between NSP intensity and sick leave.<sup>4,6</sup> This result persisted with adjustment for potential confounding by multisite pain, which was associated with NSP and sick leave in previous studies.<sup>19,44,45</sup> Thus, severe persistent NSP appears to be strongly associated with sick leave due to musculoskeletal pain, regardless of multisite pain and other personal and occupational factors.

1  
2  
3 The four trajectory classes of NSP were also associated with poor work ability over the year  
4 (Table 2). For instance, the probability of reporting reduced work ability was 13 times higher  
5 for the trajectory class with severe persistent NSP (median work ability 7.1 on the 0-10 scale),  
6 compared with low NSP (median work ability 9.5), regardless of inclusion of potential  
7 confounders in the model (Table 2, model 3). In agreement, previous studies have found that  
8 intense NSP is associated with reduced work ability in workers,<sup>3,46</sup> although none of these  
9 examined pain trajectories. Interestingly, including baseline intensity of NSP (i.e. past 3  
10 months) as an additional covariate in model 3 did not reduce the estimated association for sick  
11 leave or work ability. In fact, this adjustment resulted in even stronger estimates for work  
12 ability, which clearly indicates that the LCGA-based trajectory classes of NSP have a  
13 predictive value beyond that explained by past pain intensity assessed at a single time point.  
14  
15  
16  
17  
18  
19  
20

21 The observed consistent associations between the identified trajectories of NSP and the  
22 outcomes sick leave and work ability support the prognostic value of LCGA-based  
23 trajectories of NSP among workers, and suggests that such sub-populations can be of clinical  
24 and occupational relevance. Thus, this study supports using LCGA to identify distinct sub-  
25 populations of workers with different patterns of NSP. Further, the increase in sick leave and  
26 reduction in work ability across the four identified trajectory classes supports their usefulness  
27 as outcomes or target groups in future studies.  
28  
29  
30  
31  
32  
33  
34  
35

### 36 **Effect modification by physical work load**

37  
38 High physical work load is a known risk factor for incident NSP and has been associated with  
39 a poor prognosis.<sup>47</sup> Thus, the association for NSP trajectories with sick leave and work ability  
40 was expected to be modified by the level of self-reported physical work load at baseline.  
41 However, we could not confirm any interaction between trajectory class of NSP and physical  
42 work load neither for sick leave nor work ability. Still, it is possible that more precise  
43 technical measurements of physical work exposure would have yielded different results.  
44  
45  
46  
47  
48  
49  
50

### 51 **Association between temporal fluctuations in NSP and fluctuations in sick leave and** 52 **work ability**

53  
54  
55  
56  
57  
58  
59  
60

1  
2  
3 NSP is often referred to as a recurrent and fluctuating condition.<sup>11</sup> However, the temporal  
4 fluctuations in NSP have rarely been investigated in detail, and few, if any, studies have  
5 examined whether fluctuations in NSP are associated with concomitant changes in sick leave  
6 and work ability. The frequent repeated measures allowed us to assess the within-person  
7 temporal association between fluctuations in the intensity of NSP and changes in sick leave  
8 (every fourth week) and work ability (every twelfth week). We found that the within-person  
9 fluctuations in pain intensity were significantly associated with concomitant fluctuations in  
10 sick leave and work ability, which persisted in the fully adjusted model (Table 3). Thus, not  
11 only could we address the differences between workers in temporal patterns of NSP, but also  
12 whether the temporal fluctuations in NSP at the individual level are of predictive value.  
13  
14  
15  
16  
17  
18  
19  
20  
21

## 22 **Methodological discussion**

23  
24 As this study is limited to self-reported measures of pain and the outcomes sick leave and  
25 work ability, one cannot overlook the possibility of bias. Regarding self-reported sick leave,  
26 meta-analytic evidence indicates reasonably high convergent validity against organization and  
27 register-based records, although with a slight tendency for under-reporting.<sup>37</sup> Thus, there is a  
28 risk for underestimation of sick leave in this study. The question about days on sick leave the  
29 past month did not distinguish between work days and non-work days, which may have  
30 resulted in less precise estimates. Also, although both outcomes sick leave and work ability  
31 were assessed prospectively over 1 year, the NSP trajectories were determined during the  
32 same time period and thus causal inferences should be made with caution. Still, it seems most  
33 likely that pain preceded the occurrence of sick leave, rather than the reverse relationship.  
34  
35  
36  
37  
38  
39  
40

41 We addressed several relevant factors as confounders or effect modifiers (physical work load)  
42 of the association of pain trajectories with sick leave and work ability. However, as the causes  
43 of sick leave and poor work ability are likely multifactorial,<sup>4 19 21</sup> the focus on pain trajectories  
44 as predictors is a potential limitation. Also, the possibility of residual confounding by non-  
45 measured factors cannot be ruled out.  
46  
47  
48  
49

50 Since this study was conducted in a non-random sample with a predominance of blue-collar  
51 workers, it is important to verify the study findings in other working populations. The general  
52 notion of NSP as a fluctuating and reoccurring condition<sup>11</sup> is corroborated by our data, but  
53 this is rarely taken into account in observational studies on NSP. The inclusion of residual  
54  
55  
56  
57  
58  
59  
60

1  
2  
3 variance in the LCGA model allowed us to distinguish trajectory classes with more or less  
4 fluctuating patterns of NSP. Temporal fluctuations were more prominent in the NSP  
5 trajectories with moderate and strong pain, which may have contributed to the lower relative  
6 risk of sick leave and poor work ability compared to the trajectory class with severe persistent  
7 NSP.  
8  
9

10  
11 Since the trajectories with lower intensities of NSP, i.e., including asymptomatic, very low  
12 NSP and low recovering NSP, did not differ regarding their low occurrence of sick leave and  
13 poor work ability, we decided to merge them into a single reference category in the prediction  
14 models. Still, it is possible that these three classes differ in other prognostic outcomes.  
15  
16  
17  
18

## 19 20 **Conclusion**

21  
22 This study shows that severe persistent NSP is strongly associated with sick leave and  
23 reduced work ability over 1 year among workers. The findings indicate that LCGA can be  
24 used to identify important sub-populations of workers with a poor prognosis of sick leave and  
25 work ability. Eventually, such sub-populations can be used as outcomes and target groups in  
26 future observational and/or intervention studies, which may improve prevention and treatment  
27 of NSP.  
28  
29  
30  
31  
32  
33

## 34 **Acknowledgements**

35  
36 The study was supported by grants from the Danish government (Satspulje) and the Swedish  
37 Research Council for Health, Working Life and Welfare (Forte Dnr.2009–1761).  
38  
39  
40

## 41 **Conflict of interest**

42  
43 The authors declare none.  
44  
45

## 46 **Author contributions**

47  
48 DMH contributed to the statistical data analyses and drafting of the manuscript. AH and MBJ  
49 contributed to the conception, design, data collection and funding of the full DPhacto study.  
50 All authors (DMH, AH, SDL, MBJ, and CDNR) contributed to the conception of this study,  
51 discussed the results and commented on the manuscript.  
52  
53  
54  
55  
56  
57  
58  
59  
60

## Data sharing statement

Additional data can be accessed on request by email ([aho@arbejdsmiljoforskning.dk](mailto:aho@arbejdsmiljoforskning.dk)).

For peer review only

## References

- 1 Côté P, van der Velde G, Cassidy JD et al. The Burden and Determinants of Neck Pain in Workers: Results of the Bone and Joint Decade 2000-2010 Task Force on Neck Pain and Its Associated Disorders. *J Manipulative Physiol Ther* 2009;32:S70-S86.
- 2 Vos T, Barber RM, Bell B et al. Global, regional, and national incidence, prevalence, and years lived with disability for 301 acute and chronic diseases and injuries in 188 countries, 1990-2013: a systematic analysis for the Global Burden of Disease Study 2013. *The Lancet* 2015;386:743-800.
- 3 Rashid M, Kristofferzon M-L, Heiden M, Nilsson A. Factors related to work ability and well-being among women on sick leave due to long-term pain in the neck/shoulders and/or back: a cross-sectional study. *BMC Public Health* 2018;18:672.
- 4 Holtermann A, Hansen JV, Burr H, Sogaard K. Prognostic factors for long-term sickness absence among employees with neck-shoulder and low-back pain. *Scand J Work Environ Health* 2010;36:34-41.
- 5 Burdorf A, Naaktgeboren B, Post W. Prognostic factors for musculoskeletal sickness absence and return to work among welders and metal workers. *Occup Environ Med* 1998;55:490-5.
- 6 Andersen LL, Clausen T, Burr H, Holtermann A. Threshold of Musculoskeletal Pain Intensity for Increased Risk of Long-Term Sickness Absence among Female Healthcare Workers in Eldercare. *PLoS One* 2012;7:e41287.
- 7 Borghouts JAJ, Koes BW, Vondeling H, Bouter LM. Cost-of-illness of neck pain in The Netherlands in 1996. *Pain* 1999;80:629-636.
- 8 Woodhouse A, Pape K, Romundstad PR, Vasseljen O. Health care contact following a new incident neck or low back pain episode in the general population; the HUNT study. *BMC Health Serv Res* 2016;16:81.
- 9 Hansson EK, Hansson TH. The costs for persons sick-listed more than one month because of low back or neck problems. A two-year prospective study of Swedish patients. *Eur Spine J* 2005;14:337-345.
- 10 Fejer R, Jordan A, Hartvigsen J. Categorising the severity of neck pain: Establishment of cut-points for use in clinical and epidemiological research. *Pain* 2005;119:176-182.
- 11 Carroll L, Hogg-Johnson S, Côté P et al. Course and Prognostic Factors for Neck Pain in Workers. *Eur Spine J* 2008;17:93-100.



- 1  
2  
3 12 Bruls VEJ, Bastiaenen CHG, de Bie RA. Prognostic factors of complaints of arm,  
4 neck, and/or shoulder: a systematic review of prospective cohort studies. *Pain*  
5 2015;156:765-788.  
6  
7 13 Côté P, Cassidy JD, Carroll LJ, Kristman V. The annual incidence and course of neck  
8 pain in the general population: a population-based cohort study. *Pain* 2004;112:267-  
9 273.  
10  
11 14 Lövgren M, Gustavsson P, Melin B, Rudman A. Neck/shoulder and back pain in new  
12 graduate nurses: A growth mixture modeling analysis. *Int J Nurs Stud* 2014;51:625-  
13 639.  
14  
15 15 Kongsted A, Kent P, Axen I, Downie AS, Dunn KM. What have we learned from ten  
16 years of trajectory research in low back pain? *BMC Musculoskelet Disord*  
17 2016;17:220.  
18  
19 16 Axén I, Leboeuf-Yde C. Trajectories of low back pain. *Best Practice & Research*  
20 *Clinical Rheumatology* 2013;27:601-612.  
21  
22 17 Dunn KM, Campbell P, Jordan KP. Long-term trajectories of back pain: cohort study  
23 with 7-year follow-up. *BMJ Open* 2013;3:e003838.  
24  
25 18 de Vries H, Reneman M, Groothoff J, Geertzen J, Brouwer S. Workers Who Stay at  
26 Work Despite Chronic Nonspecific Musculoskeletal Pain: Do They Differ from  
27 Workers with Sick Leave? *Journal of Occupational Rehabilitation* 2012;22:489-502.  
28  
29 19 Feleus A, Miedema HS, Bierma-Zeinstra SMA, Hoekstra T, Koes BW, Burdorf A.  
30 Sick leave in workers with arm, neck and/or shoulder complaints; defining occurrence  
31 and discriminative trajectories over a 2-year time period. *Occup Environ Med* 2016.  
32  
33 20 Ilmarinen J, von Bonsdorff M. Work Ability. In: Whitbourne (ed.) *The Encyclopedia*  
34 *of Adulthood and Aging* 2005.  
35  
36 21 van den Berg TIJ, Elders LAM, de Zwart BCH, Burdorf A. The effects of work-  
37 related and individual factors on the Work Ability Index: a systematic review. *Occup*  
38 *Environ Med* 2009;66:211.  
39  
40 22 Ahlstrom L, Grimby-Ekman A, Hagberg M, Dellve L. The work ability index and  
41 single-item question: associations with sick leave, symptoms, and health--a  
42 prospective study of women on long-term sick leave. *Scand J Work Environ Health*  
43 2010;36:404-12.  
44  
45 23 Lötters F, Burdorf A. Prognostic Factors for Duration of Sickness Absence due to  
46 Musculoskeletal Disorders. *Clin J Pain* 2006;22:212-221.  
47  
48  
49  
50  
51  
52  
53  
54  
55  
56  
57  
58  
59  
60

- 1  
2  
3 24 Karels CH, Bierma-Zeinstra SM, Verhagen AP, Koes BW, Burdorf A. Sickness  
4 absence in patients with arm, neck and shoulder complaints presenting in physical  
5 therapy practice: 6 months follow-up. *Man Ther* 2010;15:476-481.
- 6  
7 25 Ariens GA, Bongers PM, Hoogendoorn WE, van der Wal G, van Mechelen W. High  
8 physical and psychosocial load at work and sickness absence due to neck pain. *Scand*  
9 *J Work Environ Health* 2002;28:222-31.
- 10  
11 26 Walton DM, Carroll LJ, Kasch H et al. An Overview of Systematic Reviews on  
12 Prognostic Factors in Neck Pain: Results from the International Collaboration on Neck  
13 Pain (ICON) Project. *Open Orthop J* 2013;7:494-505.
- 14  
15 27 Axén I, Bergström G, Bodin L. Using few and scattered time points for analysis of a  
16 variable course of pain can be misleading: an example using weekly text message  
17 data. *Spine J* 2014;14:1454-1459.
- 18  
19 28 Miranda H, Gold JE, Gore R, Punnett L. Recall of prior musculoskeletal pain. *Scand J*  
20 *Work Environ Health* 2006;32:294-9.
- 21  
22 29 Jung T, Wickrama KAS. An Introduction to Latent Class Growth Analysis and  
23 Growth Mixture Modeling. *Soc Personal Psychol Compass* 2008;2:302-317.
- 24  
25 30 Hallman DM, Nørregaard Rasmussen CD, Birk Jørgensen M, Holtermann A. Time  
26 course of neck-shoulder pain in workers: A longitudinal latent class growth analysis.  
27 *Scand J Work Environ Health* 2018;44:47-57.
- 28  
29 31 Jørgensen M, Korshøj M, Lagersted-Olsen J et al. Physical activities at work and risk  
30 of musculoskeletal pain and its consequences: protocol for a study with objective field  
31 measures among blue-collar workers. *BMC Musculoskelet Disord* 2013;14:1-9.
- 32  
33 32 Hallman DM, Birk Jørgensen M, Holtermann A. On the health paradox of  
34 occupational and leisure-time physical activity using objective measurements: Effects  
35 on autonomic imbalance. *PLoS One* 2017;12:e0177042.
- 36  
37 33 Hallman DM, Gupta N, Heiden M et al. Is prolonged sitting at work associated with  
38 the time course of neck-shoulder pain? A prospective study in Danish blue-collar  
39 workers. *BMJ Open* 2016;6:e012689.
- 40  
41 34 Ferreira-Valente MA, Pais-Ribeiro JL, Jensen MP. Validity of four pain intensity  
42 rating scales. *Pain* 2011;152:2399-2404.
- 43  
44 35 Dworkin RH, Turk DC, Farrar JT et al. Core outcome measures for chronic pain  
45 clinical trials: IMMPACT recommendations. *Pain* 2005;113:9-19.
- 46  
47 36 Keefe FJ, Linton SJ, Lefebvre JC. The Outcome Evaluation Questionnaire:  
48 Description and Initial Findings. *Scand J Behaviour Ther* 1992;21:19-33.
- 49  
50  
51  
52  
53  
54  
55  
56  
57  
58  
59  
60

- 1  
2  
3 37 Johns G, Miraglia M. The reliability, validity, and accuracy of self-reported  
4 absenteeism from work: A meta-analysis. *J Occup Health Psychol* 2015;20:1-14.  
5  
6 38 Tuomi K, Ilmarinen J, Jahkola A, Katajarinne L, Tulkki A. *Work ability index*.  
7 Helsinki: Finnish institute of occupational health, 1998.  
8  
9 39 Neupane S, Miranda H, Virtanen P, Siukola A, Nygard CH. Multi-site pain and work  
10 ability among an industrial population. *Occup Med (Lond)* 2011;61:563-9.  
11  
12 40 Borg G. Borg's perceived exertion and pain scales. *Champaign, IL: Human Kinetics*  
13 1998.  
14  
15 41 Kuorinka I, Jonsson B, Kilbom A et al. Standardised Nordic questionnaires for the  
16 analysis of musculoskeletal symptoms. *Appl Ergon* 1987;18:233-237.  
17  
18 42 Neupane S, Leino-Arjas P, Nygård C-H, Oakman J, Virtanen P. Developmental  
19 pathways of multisite musculoskeletal pain: what is the influence of physical and  
20 psychosocial working conditions? *Occup Environ Med* 2017;74:468-475.  
21  
22 43 Hoffman L, Stawski RS. Persons as Contexts: Evaluating Between-Person and  
23 Within-Person Effects in Longitudinal Analysis. *Research in Human Development*  
24 2009;6:97-120.  
25  
26 44 Sarquis LMM, Coggon D, Ntani G et al. Classification of neck/shoulder pain in  
27 epidemiological research: a comparison of personal and occupational characteristics,  
28 disability, and prognosis among 12,195 workers from 18 countries. *Pain*  
29 2016;157:1028-1036.  
30  
31 45 Haukka E, Kaila-Kangas L, Ojajärvi A et al. Pain in multiple sites and sickness  
32 absence trajectories: A prospective study among Finns. *Pain* 2013;154:306-312.  
33  
34 46 Bugajska J, Sagan A. Chronic musculoskeletal disorders as risk factors for reduced  
35 work ability in younger and ageing workers. *Int J Occup Saf Ergon* 2014;20:607-15.  
36  
37 47 Mayer J, Kraus T, Ochsmann E. Longitudinal evidence for the association between  
38 work-related physical exposures and neck and/or shoulder complaints: a systematic  
39 review. *Int Arch Occup Environ Health* 2012;85:587-603.  
40  
41  
42  
43  
44  
45  
46  
47  
48  
49  
50  
51  
52  
53  
54  
55  
56  
57  
58  
59  
60

## Tables

**Table 1** Descriptive characteristics of the study population (n=748)

|                                                        | N        | Median | IQR | Mean | SD   |
|--------------------------------------------------------|----------|--------|-----|------|------|
| Age (years)                                            | 748      |        |     | 44.8 | 9.6  |
| Men N (%)                                              | 411 (55) |        |     |      |      |
| BMI (kg×m <sup>-2</sup> )                              | 732      |        |     | 27.3 | 4.8  |
| Seniority (years)                                      | 722      |        |     | 13.5 | 10.3 |
| Administration workers N (%)                           | 128 (17) |        |     |      |      |
| Blue-collar workers N (%)                              | 620 (83) |        |     |      |      |
| Cleaning                                               | 115 (15) |        |     |      |      |
| Manufacturing                                          | 448 (60) |        |     |      |      |
| Transportation                                         | 57 (8)   |        |     |      |      |
| Physical work load at baseline (scale 1-10)            | 723      |        |     | 5.3  | 2.4  |
| Total days on sick leave (over all time points)        | 746      | 0.0    | 3.0 | 5.8  | 20.9 |
| Mean work ability (over all time points) (scale 0-10)  | 732      | 8.8    | 2.5 | 8.3  | 1.7  |
| Mean NSP intensity (over all time points) (scale 0-10) | 748      | 2.0    | 3.6 | 2.6  | 2.3  |
| NSP intensity at baseline (scale 0-10)                 | 748      | 3.0    | 5.0 | 3.3  | 2.9  |
| Number of pain regions at baseline (count)             | 745      | 1.0    | 3.0 | 1.7  | 1.5  |
| Compliance to SMS (missing responses, count)           |          |        |     |      |      |
| NSP intensity                                          | 748      | 0.0    | 1.0 | 1.2  | 2.7  |
| Sick leave                                             | 746      | 0.0    | 1.0 | 1.2  | 2.6  |
| Work ability                                           | 732      | 0.0    | 1.0 | 0.4  | 0.7  |

Note: median values with inter quartile range (IQR) are shown for skewed data. Abbreviations: BMI, body mass index; NSP, neck-shoulder pain.

**Table 2.** Effect of neck-shoulder pain (NSP) trajectory class on sick leave (days/month) and work ability (ordinal scale 0-10) over 1 year, referencing low NSP.

| GEE models<br>(classes) | N   | Sick leave |       |                |                | Work ability |       |                |                |
|-------------------------|-----|------------|-------|----------------|----------------|--------------|-------|----------------|----------------|
|                         |     | p-value    | RR    | 95%CI<br>Lower | 95%CI<br>Upper | p-value      | OR    | 95%CI<br>Lower | 95%CI<br>Upper |
| <b>Model 1</b>          |     |            |       |                |                |              |       |                |                |
| Low NSP                 | 292 |            | 1.00  |                |                |              | 1.00  |                |                |
| Moderate NSP            | 208 | <0.001     | 3.28  | 1.89           | 5.68           | <0.001       | 2.45  | 1.87           | 3.21           |
| Strong NSP              | 178 | <0.001     | 8.98  | 4.78           | 16.89          | <0.001       | 8.64  | 6.38           | 11.69          |
| Severe NSP              | 70  | <0.001     | 17.64 | 9.36           | 33.23          | <0.001       | 15.07 | 9.94           | 22.85          |
| <b>Model 2</b>          |     |            |       |                |                |              |       |                |                |
| Low NSP                 | 286 |            | 1.00  |                |                |              | 1.00  |                |                |
| Moderate NSP            | 204 | <0.001     | 3.25  | 1.87           | 5.64           | <0.001       | 2.40  | 1.83           | 3.16           |
| Strong NSP              | 174 | <0.001     | 8.61  | 4.54           | 16.33          | <0.001       | 9.03  | 6.62           | 12.31          |
| Severe NSP              | 68  | <0.001     | 16.00 | 8.17           | 31.34          | <0.001       | 14.77 | 9.63           | 22.66          |
| <b>Model 3</b>          |     |            |       |                |                |              |       |                |                |
| Low NSP                 | 277 |            | 1.00  |                |                |              | 1.00  |                |                |
| Moderate NSP            | 199 | <0.001     | 3.11  | 1.75           | 5.52           | <0.001       | 2.43  | 1.84           | 3.20           |
| Strong NSP              | 165 | <0.001     | 7.58  | 3.91           | 14.71          | <0.001       | 8.12  | 5.91           | 11.16          |
| Severe NSP              | 66  | <0.001     | 13.83 | 6.72           | 28.49          | <0.001       | 12.93 | 8.50           | 19.67          |

Relative risk (RR) estimates, indicating the relative increase in the number of days on sick leave per month, were obtained using Generalized Estimation Equation (GEE) with a Poisson distribution for days on sick-leave (measured at 4 week intervals). Odds ratios (OR), indicating the likelihood of a 1-unit reduction in work ability, were obtained using GEE with a multinomial distribution for work ability (measured at 12 week intervals).

Model 1: Unadjusted.

Model 2: Adjusted for age, gender and body mass index.

Model 3: Additionally adjusted for occupational sector (four categories, referencing administration) and physical work load.

**Table 3.** Within-person effect of temporal fluctuations in neck-shoulder pain (NSP, scale 0-10) on fluctuations in sick leave (days/month) and work ability (scale 0-10) over 1 year

| GEE models    | Sick leave |         |      |        |       | Work ability |      |        |       |
|---------------|------------|---------|------|--------|-------|--------------|------|--------|-------|
|               | N          | p-value | RR   | 95% CI |       | p-value      | OR   | 95% CI |       |
|               |            |         |      | Lower  | Upper |              |      | Lower  | Upper |
| NSP intensity |            |         |      |        |       |              |      |        |       |
| Model 1       | 248        | 0.008   | 1.12 | 1.03   | 1.21  | 0.005        | 1.11 | 1.03   | 1.19  |
| Model 2       | 242        | 0.008   | 1.12 | 1.03   | 1.21  | 0.009        | 1.11 | 1.03   | 1.19  |
| Model 3       | 231        | 0.011   | 1.11 | 1.02   | 1.21  | 0.002        | 1.13 | 1.04   | 1.21  |

Relative risk (RR) estimates, indicating the relative increase in the number of days on sick leave per month, were obtained using Generalized Estimation Equation (GEE) with a Poisson distribution for days on sick-leave (measured at 4 week intervals). Odds ratios (OR), indicating the likelihood of a 1-unit reduction in work ability, were obtained using GEE with a multinomial distribution for work ability (measured at 12 week intervals).

Estimates indicate the within-person effect of change in pain intensity on change in sick leave and work ability per month.

Model 1: adjusted for the person mean pain intensity across time points.

Model 2: additionally adjusted for age, gender and BMI.

Model 3: additionally adjusted for occupational sector and physical work load.

## Figure legends

**Figure 1.** Mean 1-year trajectories of days on sick leave obtained in the fully adjusted model in each trajectory class of neck-shoulder pain (NSP). The x-axis represents the 14 pain ratings over 1 year. The y-axis represents the mean predicted number of days on sick leave per month.

**Figure 2.** Association between temporal fluctuations in neck-shoulder pain (NSP) and the outcomes sick leave and work ability. The x-axis represents the difference in pain intensity scores from the person mean pain intensity across time points. The y-axis represents the predicted number of days on sick leave per month (Fig. 2a) and the predicted cumulative probability of poor work ability (Fig. 2b), as defined by the cut-point  $\leq 7$  (scale 0-10).<sup>39</sup>

## Supplemental Figures

**Supplemental Figure A.** Mean predicted intensity of neck-shoulder pain (NSP) over 1 year in the four trajectory classes of NSP obtained using Latent class growth analysis.

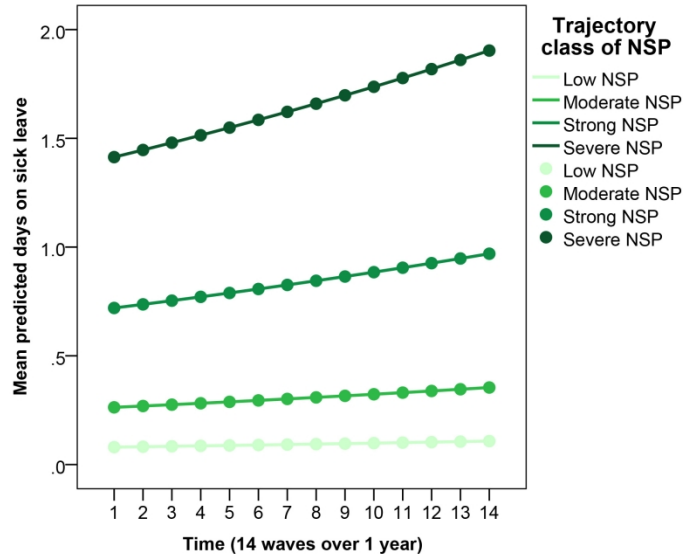

Figure 1.

Figure 1. Mean 1-year trajectories of days on sick leave obtained in the fully adjusted model in each trajectory class of neck-shoulder pain (NSP). The x-axis represents the 14 pain ratings over 1 year. The y-axis represents the mean predicted number of days on sick leave per month.

215x279mm (300 x 300 DPI)





Figure 2

Figure 2. Association between temporal fluctuations in neck-shoulder pain (NSP) and the outcomes sick leave and work ability. The x-axis represents the difference in pain intensity scores from the person mean pain intensity across time points. The y-axis represents the predicted number of days on sick leave per month (Fig. 2a) and the predicted cumulative probability of poor work ability (Fig. 2b), as defined by the cut-point  $\leq 7$  (scale 0-10).

350x199mm (300 x 300 DPI)

1  
2  
3  
4  
5  
6  
7  
8  
9  
10  
11  
12  
13  
14  
15  
16  
17  
18  
19  
20  
21  
22  
23  
24  
25  
26  
27  
28  
29  
30  
31  
32  
33  
34  
35  
36  
37  
38  
39  
40  
41  
42  
43  
44  
45  
46  
47  
48  
49  
50  
51  
52  
53  
54  
55  
56  
57  
58  
59  
60

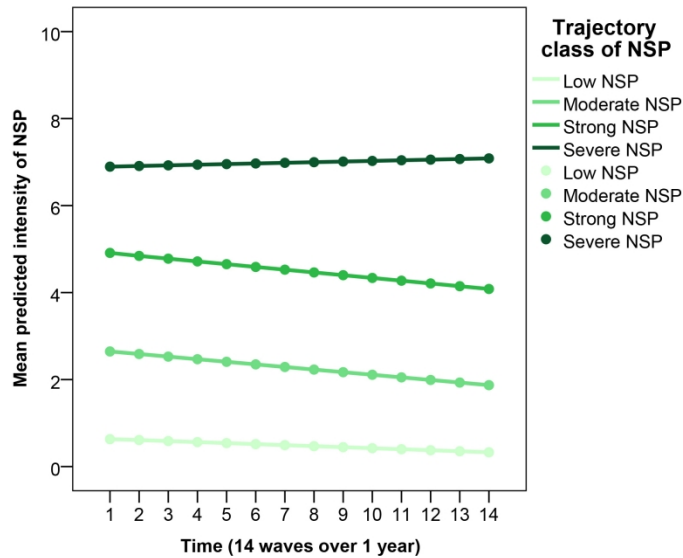

Supplemental Figure A.

Supplemental Figure A. Mean predicted intensity of neck-shoulder pain (NSP) over 1 year in the four trajectory classes of NSP obtained using Latent class growth analysis.

215x279mm (300 x 300 DPI)

## STROBE Statement—checklist of items that should be included in reports of observational studies

|                              | Item No | Recommendation                                                                                                                                                                                                                                                                                                                                                                                                                                                         | Check yes/no                                              |
|------------------------------|---------|------------------------------------------------------------------------------------------------------------------------------------------------------------------------------------------------------------------------------------------------------------------------------------------------------------------------------------------------------------------------------------------------------------------------------------------------------------------------|-----------------------------------------------------------|
| <b>Title and abstract</b>    | 1       | (a) Indicate the study's design with a commonly used term in the title or the abstract                                                                                                                                                                                                                                                                                                                                                                                 | yes                                                       |
|                              |         | (b) Provide in the abstract an informative and balanced summary of what was done and what was found                                                                                                                                                                                                                                                                                                                                                                    | yes                                                       |
| <b>Introduction</b>          |         |                                                                                                                                                                                                                                                                                                                                                                                                                                                                        |                                                           |
| Background/rationale         | 2       | Explain the scientific background and rationale for the investigation being reported                                                                                                                                                                                                                                                                                                                                                                                   | yes, p4-5                                                 |
| Objectives                   | 3       | State specific objectives, including any prespecified hypotheses                                                                                                                                                                                                                                                                                                                                                                                                       | yes, p5                                                   |
| <b>Methods</b>               |         |                                                                                                                                                                                                                                                                                                                                                                                                                                                                        |                                                           |
| Study design                 | 4       | Present key elements of study design early in the paper                                                                                                                                                                                                                                                                                                                                                                                                                | yes, p5                                                   |
| Setting                      | 5       | Describe the setting, locations, and relevant dates, including periods of recruitment, exposure, follow-up, and data collection                                                                                                                                                                                                                                                                                                                                        | yes, p5                                                   |
| Participants                 | 6       | (a) <i>Cohort study</i> —Give the eligibility criteria, and the sources and methods of selection of participants. Describe methods of follow-up<br><i>Case-control study</i> —Give the eligibility criteria, and the sources and methods of case ascertainment and control selection. Give the rationale for the choice of cases and controls<br><i>Cross-sectional study</i> —Give the eligibility criteria, and the sources and methods of selection of participants | a) yes, p5-6                                              |
|                              |         | (b) <i>Cohort study</i> —For matched studies, give matching criteria and number of exposed and unexposed<br><i>Case-control study</i> —For matched studies, give matching criteria and the number of controls per case                                                                                                                                                                                                                                                 |                                                           |
| Variables                    | 7       | Clearly define all outcomes, exposures, predictors, potential confounders, and effect modifiers. Give diagnostic criteria, if applicable                                                                                                                                                                                                                                                                                                                               | yes, p6-8                                                 |
| Data sources/<br>measurement | 8*      | For each variable of interest, give sources of data and details of methods of assessment (measurement). Describe comparability of assessment methods if there is more than one group                                                                                                                                                                                                                                                                                   | yes, p6-8                                                 |
| Bias                         | 9       | Describe any efforts to address potential sources of bias                                                                                                                                                                                                                                                                                                                                                                                                              | yes, p7-8 and 9<br>(confounders and statistical analyses) |
| Study size                   | 10      | Explain how the study size was arrived at                                                                                                                                                                                                                                                                                                                                                                                                                              | yes, p6                                                   |
| Quantitative variables       | 11      | Explain how quantitative variables were handled in the analyses. If applicable, describe which groupings were chosen and why                                                                                                                                                                                                                                                                                                                                           | yes, p8-9                                                 |
| Statistical methods          | 12      | (a) Describe all statistical methods, including those used to control for confounding                                                                                                                                                                                                                                                                                                                                                                                  | yes p8-9                                                  |

|    |                                                                  |                  |
|----|------------------------------------------------------------------|------------------|
| 1  |                                                                  |                  |
| 2  | (b) Describe any methods used to examine subgroups and           | yes, p8-9        |
| 3  | interactions                                                     |                  |
| 4  | (c) Explain how missing data were addressed                      | yes, p8          |
| 5  | (d) <i>Cohort study</i> —If applicable, explain how loss to      | yes, p8; page 11 |
| 6  | follow-up was addressed                                          |                  |
| 7  | <i>Case-control study</i> —If applicable, explain how matching   |                  |
| 8  | of cases and controls was addressed                              |                  |
| 9  | <i>Cross-sectional study</i> —If applicable, describe analytical |                  |
| 10 | methods taking account of sampling strategy                      |                  |
| 11 |                                                                  |                  |
| 12 | (e) Describe any sensitivity analyses                            |                  |
| 13 |                                                                  |                  |

Continued on next page

For peer review only

| <b>Results</b>           |     |                                                                                                                                                                                                                                                                                                                                                                                                               | <b>Yes/no</b>                                             |
|--------------------------|-----|---------------------------------------------------------------------------------------------------------------------------------------------------------------------------------------------------------------------------------------------------------------------------------------------------------------------------------------------------------------------------------------------------------------|-----------------------------------------------------------|
| Participants             | 13* | (a) Report numbers of individuals at each stage of study—eg numbers potentially eligible, examined for eligibility, confirmed eligible, included in the study, completing follow-up, and analysed<br>(b) Give reasons for non-participation at each stage<br>(c) Consider use of a flow diagram                                                                                                               | Yes, p6 (flow) p 11 (compliance), and results tables 1-3. |
| Descriptive data         | 14* | (a) Give characteristics of study participants (eg demographic, clinical, social) and information on exposures and potential confounders<br>(b) Indicate number of participants with missing data for each variable of interest<br>(c) <i>Cohort study</i> —Summarise follow-up time (eg, average and total amount)                                                                                           | Yes, p11<br>Yes, p11 (table 1)                            |
| Outcome data             | 15* | <i>Cohort study</i> —Report numbers of outcome events or summary measures over time<br><i>Case-control study</i> —Report numbers in each exposure category, or summary measures of exposure<br><i>Cross-sectional study</i> —Report numbers of outcome events or summary measures                                                                                                                             | yes, p 11 (table 1)                                       |
| Main results             | 16  | (a) Give unadjusted estimates and, if applicable, confounder-adjusted estimates and their precision (eg, 95% confidence interval). Make clear which confounders were adjusted for and why they were included<br>(b) Report category boundaries when continuous variables were categorized<br>(c) If relevant, consider translating estimates of relative risk into absolute risk for a meaningful time period | Yes, tables 2-3<br>n/a                                    |
| Other analyses           | 17  | Report other analyses done—eg analyses of subgroups and interactions, and sensitivity analyses                                                                                                                                                                                                                                                                                                                | statistical methods and results                           |
| <b>Discussion</b>        |     |                                                                                                                                                                                                                                                                                                                                                                                                               |                                                           |
| Key results              | 18  | Summarise key results with reference to study objectives                                                                                                                                                                                                                                                                                                                                                      | yes, p15                                                  |
| Limitations              | 19  | Discuss limitations of the study, taking into account sources of potential bias or imprecision. Discuss both direction and magnitude of any potential bias                                                                                                                                                                                                                                                    | yes, p17                                                  |
| Interpretation           | 20  | Give a cautious overall interpretation of results considering objectives, limitations, multiplicity of analyses, results from similar studies, and other relevant evidence                                                                                                                                                                                                                                    | yes, p18                                                  |
| Generalisability         | 21  | Discuss the generalisability (external validity) of the study results                                                                                                                                                                                                                                                                                                                                         | yes, p17 (last paragraph)                                 |
| <b>Other information</b> |     |                                                                                                                                                                                                                                                                                                                                                                                                               |                                                           |
| Funding                  | 22  | Give the source of funding and the role of the funders for the present study and, if applicable, for the original study on which the present article is based                                                                                                                                                                                                                                                 | yes, p18                                                  |

\*Give information separately for cases and controls in case-control studies and, if applicable, for exposed and unexposed groups in cohort and cross-sectional studies.

1  
2 **Note:** An Explanation and Elaboration article discusses each checklist item and gives methodological background and  
3 published examples of transparent reporting. The STROBE checklist is best used in conjunction with this article (freely  
4 available on the Web sites of PLoS Medicine at <http://www.plosmedicine.org/>, Annals of Internal Medicine at  
5 <http://www.annals.org/>, and Epidemiology at <http://www.epidem.com/>). Information on the STROBE Initiative is  
6 available at [www.strobe-statement.org](http://www.strobe-statement.org).  
7  
8  
9  
10  
11  
12  
13  
14  
15  
16  
17  
18  
19  
20  
21  
22  
23  
24  
25  
26  
27  
28  
29  
30  
31  
32  
33  
34  
35  
36  
37  
38  
39  
40  
41  
42  
43  
44  
45  
46  
47  
48  
49  
50  
51  
52  
53  
54  
55  
56  
57  
58  
59  
60

# BMJ Open

## Are trajectories of neck–shoulder pain associated with sick leave and work ability in workers? A one-year prospective study

|                                 |                                                                                                                                                                                                                                                                                                                                                                                                               |
|---------------------------------|---------------------------------------------------------------------------------------------------------------------------------------------------------------------------------------------------------------------------------------------------------------------------------------------------------------------------------------------------------------------------------------------------------------|
| Journal:                        | <i>BMJ Open</i>                                                                                                                                                                                                                                                                                                                                                                                               |
| Manuscript ID                   | bmjopen-2018-022006.R2                                                                                                                                                                                                                                                                                                                                                                                        |
| Article Type:                   | Research                                                                                                                                                                                                                                                                                                                                                                                                      |
| Date Submitted by the Author:   | 20-Nov-2018                                                                                                                                                                                                                                                                                                                                                                                                   |
| Complete List of Authors:       | Hallman, David; University of Gävle, Centre for Musculoskeletal Research<br>Holtermann, Andreas; National Research Centre for the Working Environment,<br>Dencker-Larsen, Sofie; National Research Centre for the Working Environment<br>Birk Jørgensen, Marie; National Research Centre for the Working Environment<br>Nørregaard Rasmussen, Charlotte; National Research Centre for the Working Environment |
| <b>Primary Subject Heading</b>: | Occupational and environmental medicine                                                                                                                                                                                                                                                                                                                                                                       |
| Secondary Subject Heading:      | Public health                                                                                                                                                                                                                                                                                                                                                                                                 |
| Keywords:                       | Chronic pain, LCGA, Neck pain, Occupational, Pain trajectories                                                                                                                                                                                                                                                                                                                                                |
|                                 |                                                                                                                                                                                                                                                                                                                                                                                                               |

SCHOLARONE™  
Manuscripts

# Title: Are trajectories of neck–shoulder pain associated with sick leave and work ability in workers? A one-year prospective study

Authors: David M Hallman<sup>1\*</sup>, Andreas Holtermann<sup>2,3</sup>, Sofie Dencker-Larsen<sup>2</sup>, Marie Birk Jørgensen<sup>2</sup>, Charlotte Diana Nørregaard Rasmussen<sup>2</sup>

## Affiliations:

<sup>1</sup>Centre for Musculoskeletal Research, Department of Occupational and Public Health Sciences, University of Gävle, Gävle, Sweden

<sup>2</sup>National Research Centre for the Working Environment, Copenhagen, Denmark

<sup>3</sup>Department of Sports Science and Clinical Biomechanics, University of Southern Denmark, Odense, Denmark

## \*Corresponding author:

David M Hallman, University of Gävle, Kungsbäcksvägen 47, 80176 Gävle, Sweden; Email: [david.hallman@hig.se](mailto: david.hallman@hig.se); Phone: +46 736266413

Funding: The study was supported by grants from the Danish government (Satspulje) and the Swedish Research Council for Health, Working Life and Welfare (Forte Dnr.2009–1761).

Conflict of interest: None to declare.

## Author contributions:

DMH contributed to the statistical data analyses and drafting of the manuscript. AH and MBJ contributed to the conception, design, data collection and funding of the full DPHACTO study. All authors (DMH, AH, SDL, MBJ, and CDNR) contributed to the conception of this study, discussed the results and commented on the manuscript.

## Data sharing statement:

Additional data can be accessed on request by email ([aho@arbejdsmiljoforskning.dk](mailto: aho@arbejdsmiljoforskning.dk)).

The manuscript contains about 4300 words, 3 tables, 2 figures, and 1 Supplemental figure.



## Abstract

### Objectives

The study aimed to determine the extent to which latent trajectories of neck-shoulder pain (NSP) are associated with self-reported sick leave and work ability based on frequent repeated measures over 1 year in an occupational population.

### Methods

This longitudinal study included 748 Danish workers (blue-collar, n=620; white collar, n=128). A questionnaire was administered to collect data on personal and occupational factors at baseline. Text messages were used for repeated measurements of NSP intensity (scale 0-10) over 1 year (14 waves in total). Simultaneously, self-reported sick leave (days/month) due to pain was assessed at four week intervals, while work ability (scale 0-10) was assessed using a single item (work ability index) at 12 week intervals over the year. Trajectories of NSP, distinguished by latent class growth analysis (LCGA), were used as predictors of sick leave and work ability in generalized estimation equations with multiple adjustments.

### Results

Sick leave increased and work ability decreased across all NSP trajectory classes (low, moderate, strong fluctuating, and severe persistent pain intensity). In the adjusted model, the estimated number of days on sick leave was 1.5 days/month for severe persistent NSP compared with 0.1 days/month for low NSP (RR=13.8, 95%CI 6.7–28.5). Similarly, work ability decreased markedly for severe persistent NSP (OR=12.9, 95%CI 8.5–19.7; median 7.1) compared with low NSP (median 9.5).

### Conclusion

Severe persistent NSP was associated with sick leave and poor work ability over 1 year among workers. Preventive strategies aiming at reducing severe persistent NSP among working populations are needed.

**Keywords:** Chronic pain; LCGA; Neck pain; Occupational; Pain trajectories

### Strengths and limitations of this study

- Some of the strengths of this study are:
  - Frequent repeated assessment of neck-shoulder pain, sick leave and work ability over 1 year.
  - High response rate during each month of follow-up.
- One of the limitations of this study was that sick leave was measured using self-report.

For peer review only

## Introduction

Neck-shoulder pain (NSP) is a common condition, with annual prevalence rates between 27% and 48% in different working populations.<sup>1</sup> NSP is one of the leading causes of years lived with disability worldwide,<sup>2</sup> and is associated with reduced work ability<sup>3</sup> and high sick leave rates.<sup>4,5</sup> In workers with NSP, 20% had at least one spell of sick leave in one year.<sup>4</sup> Sick leave risks are higher in workers with more severe NSP intensity.<sup>6</sup> The economic burden of NSP on organizations and society is considerable.<sup>7-9</sup> The estimated total cost of neck pain in The Netherlands in 1996 was 686 million US dollars,<sup>7</sup> and the estimated total cost of both neck and back pain in Sweden in 2001 was 1% of the gross national product (GNP).<sup>9</sup>

NSP is considered a heterogeneous condition ranging from very mild symptoms to severe chronic pain<sup>10</sup> with a substantial individual variability in progression over time.<sup>11-13</sup> This heterogeneity may, however, comprise homogenous sub-populations with distinct patterns of pain, unique risk factors and different underlying pathophysiology.<sup>14</sup> Revealing such sub-populations is likely important for early identification, establishing risk factors, and improving prevention and treatment.<sup>15</sup> However, most existing studies have been conducted on patients with low back pain, e.g.,<sup>15-17</sup> while studies identifying and describing the patterns of NSP in working populations with a wide range of pain severities are sparse. Also, there is a lack of research on the predictive value of NSP sub-populations; which is crucial for understanding the extent to which NSP sub-populations are of clinical and occupational relevance regarding intervention and treatment. Thus, it is important for research and occupational and clinical practice to distinguish sub-populations of workers with different trajectories of NSP (e.g. severity, temporal variability and time course) while assessing their predictive value against core prognostic outcomes, such as sick leave and work ability.<sup>4, 18, 19</sup>

Work ability, as defined as the balance between human resources and work demands,<sup>20</sup> is determined by multiple factors.<sup>21</sup> The perception of poor work ability is associated with sick leave and early retirement.<sup>22</sup> Sick leave due to pain is likely multifactorial, and several personal and work related (physical and psychosocial) factors have been identified as potential determinants of increased risks.<sup>4, 19, 23, 24</sup> High physical workload is associated with poor work ability and occurrence of sick leave due to pain,<sup>4, 25</sup> and may hamper return to work.<sup>23</sup> Thus, the level of physical workload is a potential moderator of the relationship of NSP trajectories with work ability and sick leave.

1  
2  
3  
4  
5 Most previous studies on the prognosis of NSP have relied only on few measurements in time  
6 interspersed by long intervals, e.g. years.<sup>11 26</sup> Such studies are not designed to capture the  
7 detailed time course (trajectory) or temporal fluctuations in NSP (e.g. between weeks or  
8 months). In contrast, frequent repeated measurements of pain facilitate accurate and precise  
9 identification of individual pain trajectories<sup>27</sup> and minimize recall bias.<sup>28</sup>  
10  
11  
12  
13  
14

15 Latent class growth analysis (LCGA) is a common statistical approach for identifying  
16 homogenous sub-populations (latent classes) based on individual growth parameters (i.e.  
17 intercept, slope and residual variance) in repeated measures data.<sup>29</sup> We have previously used  
18 LCGA to distinguish trajectory classes of NSP among the current population of workers based  
19 on frequent repeated measurements of NSP over 1 year.<sup>30</sup> We identified six distinct  
20 trajectories of NSP ranging from “asymptomatic” (prevalence 11%) to “severe persistent  
21 NSP” (9%). Several personal and occupational factors, as well as symptom characteristics at  
22 baseline predicted trajectory class membership. However, understanding the occupational and  
23 clinical relevance of trajectories of NSP requires a determination of their predictive value  
24 against core occupational and clinical outcomes. Particularly, identifying NSP trajectories  
25 associated with unfavorable outcomes would likely aid targeted prevention and treatment.  
26  
27  
28  
29  
30  
31  
32  
33  
34  
35

36 The aim of this study is to determine the extent to which latent trajectories of NSP are  
37 associated with self-reported sick leave due to musculoskeletal pain and with work ability  
38 based on frequent repeated measures over 1 year in an occupational population. A second aim  
39 is to investigate the temporal association (within person) between fluctuations in NSP and the  
40 outcomes sick leave and work ability.  
41  
42  
43  
44  
45  
46

## 47 **Methods**

### 48 **Study design**

49 This is a prospective study using data from the Danish Physical activity cohort with objective  
50 measurements (DPHacto). The study protocol for the cohort is reported in detail elsewhere.<sup>31</sup>  
51 Data collection took place from April 2012 to May 2014 at 15 Danish companies, including  
52 workers in four occupational sectors (cleaning, manufacturing, transportation and office  
53 work/administration). The initial contact and recruitment of companies were performed in  
54  
55  
56  
57  
58  
59  
60

1  
2  
3 collaboration with a large Danish union. The companies were selected to represent blue-collar  
4 occupations with different levels of physical demands at work.  
5  
6  
7

8 Baseline data collection consisted of a brief web-based questionnaire, a standard health  
9 examination and objective diurnal measurements of physical activity and heart rate (presented  
10 elsewhere.<sup>32 33</sup> Prospective self-reported data on musculoskeletal pain, sick leave due to pain  
11 and work ability was collected repeatedly over 12 months using text messages.  
12  
13  
14  
15

### 16 **Study population**

17 The inclusion criterion for participation was current employment within any of the recruited  
18 work places. Exclusion criteria were holding a managing position or being pregnant or a  
19 student/trainee. In addition, workers not responding to the baseline questionnaire and/or the  
20 prospective measurements were excluded.  
21  
22  
23  
24  
25

26 Among the 2107 invited workers, 1119 agreed to participate and 32 of them were excluded  
27 due to holding a managing position (n=17) or being pregnant (n=2) or a student/trainee  
28 (n=13). Of the remaining 1087 eligible workers, 782 responded to the questionnaire and 748  
29 took part in the prospective measurements from baseline. Thus, the final study sample  
30 consisted of 748 workers (blue-collar, n=620; white collar, n=128). Descriptive characteristics  
31 of the study population are shown in Table 1.  
32  
33  
34  
35  
36  
37  
38

39 All participants provided their written informed consent prior to participation. The present  
40 study was conducted according to the Declaration of Helsinki, approved by the Danish Data  
41 Protection Agency, and evaluated by the Regional Ethics Committee in Copenhagen,  
42 Denmark (H-2-2012-011).  
43  
44  
45  
46  
47

### 48 **Repeated assessment using text messages**

49 Text messages (SMS) were used to assess self-reported pain intensity in the neck-shoulder  
50 region, days on sick leave and work ability using the commercial software “SMS-Track”  
51 (<https://sms-track.com/>). Starting at baseline, data on NSP and sick leave were collected at  
52 four week intervals (14 waves), while data on work ability were collected at 12 week intervals  
53 (4 waves in total) during the 1-year study. The SMS were sent on Sundays, with a reminder  
54 the following day.  
55  
56  
57  
58  
59  
60

### Neck-shoulder pain

Pain intensity in the neck-shoulder region (NSP) the past month was assessed using an 11-point numeric rating scale (NRS), which ranges from 0 (“no pain”) to 10 (“worst pain imaginable”). The worker responded to the question “*rate the worst pain you have experienced in your neck/shoulders within the past month?*” The NRS is a reliable and valid instrument for assessing pain intensity<sup>34</sup> and is recommended as an outcome in clinical trials.<sup>35</sup>

### Sick leave

Sick-leave due to pain was assessed using a single-item from the validated Outcome Evaluation Questionnaire<sup>36</sup>: “*Within the past month, how many days have you been absent from work due to pain in muscles or joints?*” with response categories ranging from 0 to 31 days. Based on a recent meta-analysis, self-reported sick leave demonstrates good test-retest reliability and reasonably high convergent validity against records.<sup>37</sup>

### Work ability

Work ability was assessed using a validated single item<sup>22</sup> from the work ability index.<sup>38</sup> The worker responded to the question “*Please rate your present work ability?*” with response categories ranging from 0 (unable to work) to 10 (“work ability as its best”). A score  $\leq 7$  denotes poor work ability.<sup>39</sup>

### Assessment of possible confounders and effect modifiers

Theoretical assumptions and empirical evidence were used to select possible confounders and effect modifiers which were accounted for in the statistical analyses. The following variables were measured at baseline as previously described<sup>30</sup>: age (years,) and gender (male or female) based on civil registration number, body mass index (BMI) based on objectively measured height and weight, occupational sector (manufacturing, cleaning, transportation, and administration/office work within the same workplaces), and seniority in the current job (years). Physical work load was measured by the question “*How physically demanding do you normally consider your present work?*” using a ten-point (1-10) response scale modified from Borg,<sup>40</sup> with higher values indicating higher physical demands. Multisite pain was measured based on the Standardized Nordic questionnaire for the analysis of musculoskeletal symptoms<sup>41</sup> asking about pain intensity (NRS, scale 0-10) during the past three months in

1  
2  
3 seven different anatomical areas (i.e. neck/shoulders, elbows, hands/wrists, lower back, hips,  
4 knees, and feet/ankles). A cut-point of >2 was used to indicate the occurrence of pain,  
5 whereby the number of pain sites was determined.<sup>42</sup> Since the relationship between NSP, sick  
6 leave and work ability may depend on the level of physical demands at work, physical work  
7 load was considered both a confounder and an effect modifier, while the other variables were  
8 solely included as possible confounders.  
9  
10  
11  
12  
13  
14

### 15 **Statistical analyses**

16  
17 Growth trajectories (latent classes) of the intensity in NSP were identified using LCGA in  
18 Latent Gold version 5.1 (Statistical innovations Belmont, MA, USA). The LCGA procedure  
19 and the resulting trajectory classes of NSP are described in a previous study on the same  
20 population.<sup>30</sup> In brief, the LCGA assigns individuals to latent classes based on maximum  
21 posterior probabilities. That is, using growth parameters (i.e. intercept, slope and residual  
22 variance) reflecting change in an observed variable (i.e. pain intensity) over time, LCGA  
23 assigns individuals to latent classes (categorical variable) assuming homogeneity within class  
24 and heterogeneity between classes.<sup>29 43</sup>  
25  
26  
27  
28  
29  
30  
31

32  
33 The LCGA models were performed using Time (14 waves over 1 year) as a continuous linear  
34 predictor and NSP intensity as a continuous dependent variable. Missing values were  
35 considered as missing at random and included in all models without imputations. The optimal  
36 number of classes was determined based on appropriate model fit indices, i.e. Bayesian  
37 information criterion (BIC), Entropy and Bootstrap log likelihood ratio (BLRT), which were  
38 obtained in consecutive LCGA models with 1-10 a priori class solutions. Then, the models  
39 were evaluated based on the estimated growth parameters and clinical distinction between the  
40 identified classes. The identified trajectories of NSP were used as an independent variable in  
41 further statistical analyses of associations with sick leave and work ability over the same year.  
42  
43  
44  
45  
46  
47  
48

49  
50 The association of NSP trajectories with sick leave (SMS at four week intervals over 1 year)  
51 and work ability (SMS each quarter) during the same year was determined using Generalized  
52 Estimation Equation (GEE) regression modeling with an auto regressive first order (AR1)  
53 covariance structure to account for weaker correlations with increasing distance between time  
54 points.  
55  
56  
57  
58  
59  
60



1  
2  
3 The association of NSP trajectories with sick-leave (days/month) was tested using GEE with a  
4 Poisson distribution and a log link function. Fixed factors were NSP trajectory class  
5 (categorical variable), time (continuous variable, 14 time points) and the interaction between  
6 trajectory class and time. The interaction term was kept in the model if it was significant  
7 ( $p < 0.05$ ). We tested both linear and quadratic time trends, but decided on a linear model since  
8 the quadratic model did not improve model fit. The primary GEE models were constructed in  
9 three steps: (model 1) unadjusted, (model 2) adjusted for age, gender and BMI, and (model 3)  
10 additionally adjusted for occupational sector (four categories) and physical work load  
11 (continuous variable). Then, we tested if the results of the primary models were consistent  
12 when accounting for baseline pain intensity and comorbidity of multisite pain, as they may be  
13 associated with both NSP trajectories and the outcomes. Thus, secondary models were  
14 estimated with additional adjustment for the intensity of NSP (model 4) and the number of  
15 pain regions (model 5) at baseline (past three months). Finally, to test for potential effect  
16 modification by physical work load, model 3 was re-run with an interaction between NSP  
17 trajectory class and physical work load (model 6).  
18  
19  
20  
21  
22  
23  
24  
25  
26  
27  
28  
29

30 The association of NSP trajectory class with work ability (dependent variable, ordinal scale)  
31 was tested using GEE regression modeling with a multinomial distribution and a cumulative  
32 logit link function. Fixed factors were NSP trajectory class (categorical variable), time (linear  
33 continuous variable, 4 time points), and the interaction between trajectory class and time,  
34 which was kept only if reaching significance ( $p < 0.05$ ). The models were constructed with and  
35 without adjustment for covariates, as explained above.  
36  
37  
38  
39  
40  
41  
42

43 Additional GEE models were constructed to investigate the within person association of  
44 temporal fluctuations in the intensity of NSP with sick leave and work ability (outcomes). To  
45 partition the within and between subjects variances in the predictor (intensity of NSP), the  
46 mean pain intensity score across all time points was determined for each individual. Then, the  
47 person mean pain score was subtracted from each repeated pain rating and used as an  
48 independent variable (within subject effect), while adjusting for the person mean pain as a  
49 covariate (between-subjects effect).<sup>43</sup> Thus, these GEE models were constructed with three  
50 fixed factors: (i) time (14 waves), (ii) the person mean pain intensity across waves, and (iii)  
51 the difference from the mean pain intensity during each wave for the individual (within  
52 subject effect). The within-subject effect would then reflect the population averaged  
53 association with the outcome for each unit change in pain intensity per month for the  
54  
55  
56  
57  
58  
59  
60



1  
2  
3 individual. Model specifications for sick leave and work ability were the same as above. The  
4 models were estimated with and without adjustment for potential confounders as explained  
5 above.  
6  
7  
8  
9

10 The regression models were estimated using SPSS software version 22 (IBM, USA). For each  
11 model, we derived the exponential estimate, i.e. relative risk (RR) and odds ratio (OR) for  
12 sick leave and work ability, respectively, and 95% confidence intervals (CI). P-values <0.05  
13 were considered significant.  
14  
15  
16  
17

### 18 **Patient and public involvement**

19  
20 No patients or public were directly involved in setting the research questions and outcomes,  
21 design and conduct of this study, or interpretation of the results. Results will be disseminated  
22 to the participants at <http://www.nfa.dk/>.  
23  
24  
25  
26  
27  
28

## 29 **Results**

### 30 **Characteristics of the study population**

31  
32 Characteristics of the study population are shown in Table 1. The study sample consisted of  
33 both males and females, and most were blue-collar workers. The workers were on average of  
34 middle age, slightly overweight, and had been in their current job for 14 years. The mean  
35 intensity of NSP across all time points was 2.6 (scale 0-10). Most of the workers rated high  
36 work ability (>7, scale 0-10) across the study period, while the average worker accumulated 6  
37 days on sick leave due to pain over 1 year, although with a considerable dispersion between  
38 individuals. Compliance to the repeated measurements (SMS) in the study was high; on  
39 average, the workers had 1.2 missing responses to pain and sick leave (14 waves) and 0.4  
40 missing responses to work ability (4 waves) (Table 1). The amount of missing data increased  
41 over time. During the second wave, the response rates were 96%, 96% and 93% for pain, sick  
42 leave and work ability, respectively, while the response rates dropped to 87%, 88% and 90%  
43 during the last wave.  
44  
45  
46  
47  
48  
49  
50  
51  
52  
53  
54  
55  
56

57 [Insert Table 1 about here]  
58  
59  
60

### Identified latent trajectories of NSP

Based on model fit indices (BIC, Entropy and BLRT) and distinction between classes obtained from consecutive LCGA models, a six-class solution was chosen.<sup>30</sup> The growth pattern and prevalence (%) of the six identified trajectory classes of NSP were characterized as follows (see also Supplemental Figure A): class 1, *asymptomatic* (11%); class 2, *very low NSP* (10%); class 3, *low recovering NSP* (18%); class 4, *moderate fluctuating NSP* (28%); class 5, *strong fluctuating NSP* (24 %); and class 6, *severe persistent NSP* (9%). The trajectory classes with lower intensities of NSP (classes 1-3) did not differ in total days on sick leave or mean work ability over 1 year; and the occurrence of sick leave was very low, while work ability was high across the three classes. Thus, classes 1-3 were merged into a single category (low NSP 39%), which was used as a reference in further analyses.

### Association between NSP trajectory classes and sick leave over 1 year

Poisson regression estimates of the association of NSP trajectories with sick leave due to pain (days /month) are shown in Table 2. There was no significant time effect on sick leave (unadjusted RR=1.02, 95%CI 0.99-1.06). Thus, the interaction between NSP trajectory class and time was discarded from the models.

Based on the fully adjusted model (Table 2, model 3) referencing low NSP, the relative risk of sick leave increased for moderate (RR=3.1, 95%CI 1.8–5.5), strong fluctuating (RR=7.6, 95%CI 3.9–14.7), and severe persistent NSP (RR=13.8, 95%CI 6.7–28.5). On average, the estimated number of days on sick leave per month was 0.1 (95%CI 0.1–0.15) for low NSP, 0.3 (95%CI 0.2–0.4) for moderate NSP, 0.8 (95%CI 0.5–1.2) for strong NSP, and 1.5 (95%CI 1.0–2.4) for severe persistent NSP. Predicted values of sick leave for each wave over 1 year are shown in Figure 1.

Additional adjustment for multisite pain showed similar estimates for moderate NSP (RR=3.0, 95%CI 1.7–5.4), strong fluctuating NSP (RR=7.2, 95%CI 3.5–14.5) and severe persistent NSP (RR=13.1, 95%CI 6.1–28). Also, adjustment for baseline pain intensity revealed stronger estimates for moderate NSP (RR=3.7, 95%CI 2.1–6.8), strong fluctuating NSP (RR=10.9, 95%CI 5.1–23.7) and severe persistent NSP (RR=24.5, 95%CI 10.4–57.9), although with wider CIs.

1  
2  
3 There was no significant interaction between NSP trajectory class and physical work load on  
4 sick leave.  
5  
6  
7  
8

9 [Insert Figure 1 about here]  
10  
11  
12

### 13 **Association between NSP trajectory classes and work ability over 1 year**

14

15  
16 The ordinal regression estimates of the association between trajectories of NSP and work  
17 ability (measured each quarter) are shown in Table 2.  
18

19  
20 There was a small time effect indicating reduced work ability over the year (unadjusted OR  
21 1.05, 95%CI 0.99–1.11). There was no interaction between NSP trajectory class and time,  
22 whereby this interaction was discarded from the model.  
23  
24

25  
26 NSP trajectory class was inversely associated with work ability (Table 2). Based on the fully  
27 adjusted model referencing low NSP (Table 2, model 3), the likelihood of a 1-unit reduction  
28 in work ability increased for moderate (OR=2.4, 95%CI 1.8–3.2), strong fluctuating (OR=8.1,  
29 95%CI 5.9–11.2), and severe persistent NSP (OR=12.9, 95%CI 8.5–19.7). The median scores  
30 (IQR) of work ability during the year were 9.5(1.7) for low NSP, 9.0(2.0) for moderate NSP,  
31 7.8(2.0) for strong NSP, and 7.1(2.5) for severe persistent NSP.  
32  
33

34  
35 Additional adjustment for multisite pain showed slightly weaker estimates for moderate NSP  
36 (OR=2.2, 95%CI 1.7–2.9), strong fluctuating NSP (OR=6.4, 95%CI 4.6–9.0) and severe  
37 persistent NSP (OR=10.4, 95%CI 6.7–16.0). Further, adjustment for baseline pain intensity  
38 showed similar estimates for moderate NSP (OR=2.6, 95%CI 1.9–3.5), strong fluctuating  
39 NSP (OR=9.1, 95%CI 6.3–13.1) and severe persistent NSP (OR=15.4, 95%CI 9.3–25.5).  
40  
41

42  
43 There was no significant interaction between NSP trajectory class and physical work load on  
44 work ability.  
45  
46  
47  
48

49 [Insert Table 2 about here]  
50  
51  
52

### 53 **Within-person association of NSP with sick leave and workability**

54  
55  
56  
57  
58  
59  
60

1  
2  
3 Due to the high work ability scores and low prevalence of sick leave in the classes with lower  
4 intensities of NSP, these analyses included only workers assigned to the trajectory classes  
5 strong fluctuating and severe persistent NSP (n=248).  
6  
7

8  
9 The within-person associations of pain intensity with sick leave due to pain and work ability  
10 are shown in Table 3.  
11

12  
13 Within person fluctuations in the intensity of NSP were positively associated with sick leave  
14 (adjusted RR=1.11, 95%CI 1.02–1.21). That is, higher intensity of NSP was associated with  
15 more days of sick leave during a particular month at the individual level (Table 3 and Figure  
16 2a).  
17  
18  
19

20  
21 A similar within-person association was found between fluctuations in pain intensity and  
22 work ability (adjusted OR 1.13, 95%CI 1.04–1.21). For example, increasing intensity of NSP  
23 was associated with higher probabilities of reduced work ability (Table 3). This association is  
24 illustrated in Figure 2b as the estimated probability of reporting poor work ability ( $\leq 7$  on the  
25 0-10 scale).<sup>39</sup>  
26  
27  
28  
29  
30  
31  
32

33 [Insert Table 3 about here]  
34

35 [Insert Figure 2]  
36  
37  
38  
39  
40  
41  
42  
43  
44  
45  
46  
47  
48  
49  
50  
51  
52  
53  
54  
55  
56  
57  
58  
59  
60

## Discussion

In summary, this prospective study investigated the relationship between LCGA-based trajectories of NSP and the outcomes sick leave and work ability. We found that the distinguished trajectory classes of NSP were strongly associated with sick leave due to pain and poor work ability over 1 year, and that the temporal fluctuations in pain intensity predicted sick leave and work ability at the individual level.

To our knowledge, this study is unique in assessing the association between LCGA-based trajectories of NSP and important prognostic outcomes among workers. A clear strength of the study is the use of frequent prospective measures of both exposure (intensity of NSP) and outcomes (work ability and sick leave) over 1 year. The high response rate to the SMS is also a strength supporting the feasibility of this method to obtain frequent repeated measurements of pain in future studies on the prognosis of NSP.

### Trajectories of NSP, sick leave and work ability

The trajectory classes of NSP used in this study were distinguished using LCGA, resulting in six distinct trajectories of NSP.<sup>30</sup> This corroborates a study by Lövgren et al. (2014) which used Growth Mixture Modeling to identify six trajectory classes of NSP in nursing students entering working life. In contrast, the severity of NSP in the current sample of workers was much higher, perhaps due to the large proportion of blue-collar workers in this study.<sup>1</sup> The high prevalence of strong fluctuating (24%) and severe persistent NSP (9%), with mean pain intensities of 5 and 7 (scale 0-10), respectively, is noteworthy.

Trajectory class of NSP was strongly associated with the number of days on sick leave over the 1-year study period. Particularly, the fully adjusted model indicated an increased relative risk of sick leave in the trajectory class with severe persistent NSP (mean 1.5 days/month), compared with low NSP (mean 0.1 days/month). This result is in line with previous prospective studies showing a positive association between NSP intensity and sick leave.<sup>4 6</sup> This result persisted with adjustment for potential confounding by multisite pain, which was associated with NSP and sick leave in previous studies.<sup>19 44 45</sup> Thus, severe persistent NSP appears to be strongly associated with sick leave due to musculoskeletal pain, regardless of multisite pain and other personal and occupational factors.

1  
2  
3 The four trajectory classes of NSP were also associated with poor work ability over the year  
4 (Table 2). For instance, the probability of reporting reduced work ability was 13 times higher  
5 for the trajectory class with severe persistent NSP (median work ability 7.1 on the 0-10 scale),  
6 compared with low NSP (median work ability 9.5), regardless of inclusion of potential  
7 confounders in the model (Table 2, model 3). In agreement, previous studies have found that  
8 intense NSP is associated with reduced work ability in workers,<sup>3 46</sup> although none of these  
9 examined pain trajectories. Interestingly, including baseline intensity of NSP (i.e. past 3  
10 months) as an additional covariate in model 3 did not reduce the estimated association for sick  
11 leave or work ability. In fact, this adjustment resulted in even stronger estimates for work  
12 ability, which clearly indicates that the LCGA-based trajectory classes of NSP have a  
13 predictive value beyond that explained by past pain intensity assessed at a single time point.  
14  
15  
16  
17  
18  
19  
20  
21  
22

23 The observed consistent associations between the identified trajectories of NSP and the  
24 outcomes sick leave and work ability support the prognostic value of LCGA-based  
25 trajectories of NSP among workers, and suggests that such sub-populations can be of clinical  
26 and occupational relevance. Thus, this study supports using LCGA to identify distinct sub-  
27 populations of workers with different patterns of NSP. Further, the increase in relative risk of  
28 sick leave and poor work ability for severe persistent NSP points to the need for interventions  
29 and preventive strategies aiming at reducing severe persistent NSP in working populations.  
30  
31  
32  
33  
34  
35  
36  
37  
38  
39

### 40 **Effect modification by physical work load**

41 High physical work load is a known risk factor for incident NSP and has been associated with  
42 a poor prognosis.<sup>47</sup> Thus, the association for NSP trajectories with sick leave and work ability  
43 was expected to be modified by the level of self-reported physical work load at baseline.  
44 However, we could not confirm any interaction between trajectory class of NSP and physical  
45 work load neither for sick leave nor work ability. Still, it is possible that more precise  
46 technical measurements of physical work exposure would have yielded different results.  
47  
48  
49  
50  
51  
52  
53  
54

### 55 **Association of temporal fluctuations in NSP with sick leave and work ability**

56  
57 NSP is often referred to as a recurrent and fluctuating condition.<sup>11</sup> However, the temporal  
58 fluctuations in NSP have rarely been investigated in detail, and few, if any, studies have  
59  
60

1  
2  
3 examined whether fluctuations in NSP are associated with sick leave and work ability. The  
4 frequent repeated measures allowed us to assess the within-person temporal association  
5 between fluctuations in the intensity of NSP and sick leave (every fourth week) and work  
6 ability (every twelfth week). We found that the within-person fluctuations in pain intensity  
7 were significantly associated with both sick leave and work ability, which persisted in the  
8 fully adjusted model (Table 3). That is, when the individual pain score increased, the  
9 likelihood of sick leave and poor work ability also increased. Thus, not only could we address  
10 the differences between workers in temporal patterns of NSP, but also whether the temporal  
11 fluctuations in NSP at the individual level are of predictive value.  
12  
13  
14  
15  
16  
17  
18  
19  
20  
21

## 22 **Methodological discussion**

23  
24 As this study is limited to self-reported measures of pain and the outcomes sick leave and  
25 work ability, one cannot overlook the possibility of bias. Regarding self-reported sick leave,  
26 meta-analytic evidence indicates reasonably high convergent validity against organization and  
27 register-based records, although with a slight tendency for under-reporting.<sup>37</sup> Thus, there is a  
28 risk for underestimation of sick leave in this study. The question about days on sick leave the  
29 past month did not distinguish between work days and non-work days, which may have  
30 resulted in less precise estimates. Also, although both outcomes sick leave and work ability  
31 were assessed prospectively over 1 year, the NSP trajectories were determined during the  
32 same time period and thus causal inferences should be made with caution. Still, it seems most  
33 likely that pain preceded the occurrence of sick leave, rather than the reverse relationship. The  
34 compliance to text messages was very high on average (Table 1). Still, missing data increased  
35 slightly over time, which might have introduced some uncertainties in the models.  
36  
37  
38  
39  
40  
41  
42  
43  
44  
45

46 We addressed several relevant factors as confounders or effect modifiers (physical work load)  
47 of the association of pain trajectories with sick leave and work ability. However, as the causes  
48 of sick leave and poor work ability are likely multifactorial,<sup>4 19 21</sup> the focus on pain trajectories  
49 as predictors is a potential limitation because it does not inform about other potentially  
50 important prognostic factors. Also, the possibility of residual confounding by non-measured  
51 factors cannot be ruled out. For instance, we did not measure comorbidity of chronic  
52 conditions that might be associated with both NSP trajectories and the outcomes.  
53  
54  
55  
56  
57  
58  
59  
60



1  
2  
3 Since this study was conducted in a non-random sample with a predominance of blue-collar  
4 workers, it is important to verify the study findings in other working populations. The general  
5 notion of NSP as a fluctuating and reoccurring condition<sup>11</sup> is corroborated by our data, but  
6 this is rarely taken into account in observational studies on NSP. The inclusion of residual  
7 variance in the LCGA model allowed us to distinguish trajectory classes with more or less  
8 fluctuating patterns of NSP. Temporal fluctuations were more prominent in the NSP  
9 trajectories with moderate and strong pain, which may have contributed to the lower relative  
10 risk of sick leave and poor work ability compared to the trajectory class with severe persistent  
11 NSP.  
12  
13  
14  
15  
16  
17  
18

19 Since the trajectories with lower intensities of NSP, i.e., including asymptomatic, very low  
20 NSP and low recovering NSP, did not differ regarding their low occurrence of sick leave and  
21 poor work ability, we decided to merge them into a single reference category in the prediction  
22 models. Still, it is possible that these three classes differ in other prognostic outcomes.  
23  
24  
25  
26  
27  
28

## 29 **Conclusion**

30  
31 This longitudinal study shows that severe persistent NSP is associated with sick leave due to  
32 pain and reduced work ability over 1 year among workers. The high prevalence of severe  
33 persistent NSP and the increase in relative risk of sick leave and poor work ability point to the  
34 need for preventive strategies aiming at reducing severe persistent NSP among workers.  
35 Overall, our findings contribute with further understanding of the possible consequences of  
36 different time patterns and levels of NSP, which can be of general importance for researchers,  
37 practitioners and clinicians.  
38  
39  
40  
41  
42  
43  
44  
45

## 46 **Acknowledgements**

47 The study was supported by grants from the Danish government (Satspulje) and the Swedish  
48 Research Council for Health, Working Life and Welfare (Forte Dnr.2009–1761).  
49  
50  
51  
52

## 53 **Conflict of interest**

54 The authors declare none.  
55  
56  
57  
58  
59  
60



## Author contributions

DMH contributed to the statistical data analyses and drafting of the manuscript. AH and MBJ contributed to the conception, design, data collection and funding of the full DPhacto study. All authors (DMH, AH, SDL, MBJ, and CDNR) contributed to the conception of this study, discussed the results and commented on the manuscript.

## Data sharing statement

Additional data can be accessed on request by email ([aho@arbejdsmiljoforskning.dk](mailto:aho@arbejdsmiljoforskning.dk)).

## References

- 1 Côté P, van der Velde G, Cassidy JD et al. The Burden and Determinants of Neck Pain in Workers: Results of the Bone and Joint Decade 2000-2010 Task Force on Neck Pain and Its Associated Disorders. *J Manipulative Physiol Ther* 2009;32:S70-S86.
- 2 Vos T, Barber RM, Bell B et al. Global, regional, and national incidence, prevalence, and years lived with disability for 301 acute and chronic diseases and injuries in 188 countries, 1990-2013: a systematic analysis for the Global Burden of Disease Study 2013. *The Lancet* 2015;386:743-800.
- 3 Rashid M, Kristofferzon M-L, Heiden M, Nilsson A. Factors related to work ability and well-being among women on sick leave due to long-term pain in the neck/shoulders and/or back: a cross-sectional study. *BMC Public Health* 2018;18:672.
- 4 Holtermann A, Hansen JV, Burr H, Sogaard K. Prognostic factors for long-term sickness absence among employees with neck-shoulder and low-back pain. *Scand J Work Environ Health* 2010;36:34-41.
- 5 Burdorf A, Naaktgeboren B, Post W. Prognostic factors for musculoskeletal sickness absence and return to work among welders and metal workers. *Occup Environ Med* 1998;55:490-5.
- 6 Andersen LL, Clausen T, Burr H, Holtermann A. Threshold of Musculoskeletal Pain Intensity for Increased Risk of Long-Term Sickness Absence among Female Healthcare Workers in Eldercare. *PLoS One* 2012;7:e41287.
- 7 Borghouts JAJ, Koes BW, Vondeling H, Bouter LM. Cost-of-illness of neck pain in The Netherlands in 1996. *Pain* 1999;80:629-636.
- 8 Woodhouse A, Pape K, Romundstad PR, Vasseljen O. Health care contact following a new incident neck or low back pain episode in the general population; the HUNT study. *BMC Health Serv Res* 2016;16:81.
- 9 Hansson EK, Hansson TH. The costs for persons sick-listed more than one month because of low back or neck problems. A two-year prospective study of Swedish patients. *Eur Spine J* 2005;14:337-345.
- 10 Fejer R, Jordan A, Hartvigsen J. Categorising the severity of neck pain: Establishment of cut-points for use in clinical and epidemiological research. *Pain* 2005;119:176-182.
- 11 Carroll L, Hogg-Johnson S, Côté P et al. Course and Prognostic Factors for Neck Pain in Workers. *Eur Spine J* 2008;17:93-100.

- 1  
2  
3 12 Bruls VEJ, Bastiaenen CHG, de Bie RA. Prognostic factors of complaints of arm,  
4 neck, and/or shoulder: a systematic review of prospective cohort studies. *Pain*  
5 2015;156:765-788.  
6  
7  
8 13 Côté P, Cassidy JD, Carroll LJ, Kristman V. The annual incidence and course of neck  
9 pain in the general population: a population-based cohort study. *Pain* 2004;112:267-  
10 273.  
11  
12  
13 14 Lövgren M, Gustavsson P, Melin B, Rudman A. Neck/shoulder and back pain in new  
14 graduate nurses: A growth mixture modeling analysis. *Int J Nurs Stud* 2014;51:625-  
15 639.  
16  
17  
18 15 Kongsted A, Kent P, Axen I, Downie AS, Dunn KM. What have we learned from ten  
19 years of trajectory research in low back pain? *BMC Musculoskelet Disord*  
20 2016;17:220.  
21  
22  
23 16 Axén I, Leboeuf-Yde C. Trajectories of low back pain. *Best Practice & Research*  
24 *Clinical Rheumatology* 2013;27:601-612.  
25  
26  
27 17 Dunn KM, Campbell P, Jordan KP. Long-term trajectories of back pain: cohort study  
28 with 7-year follow-up. *BMJ Open* 2013;3:e003838.  
29  
30  
31 18 de Vries H, Reneman M, Groothoff J, Geertzen J, Brouwer S. Workers Who Stay at  
32 Work Despite Chronic Nonspecific Musculoskeletal Pain: Do They Differ from  
33 Workers with Sick Leave? *Journal of Occupational Rehabilitation* 2012;22:489-502.  
34  
35  
36 19 Feleus A, Miedema HS, Bierma-Zeinstra SMA, Hoekstra T, Koes BW, Burdorf A.  
37 Sick leave in workers with arm, neck and/or shoulder complaints; defining occurrence  
38 and discriminative trajectories over a 2-year time period. *Occup Environ Med* 2016.  
39  
40  
41 20 Ilmarinen J, von Bonsdorff M. Work Ability. In: Whitbourne (ed.) *The Encyclopedia*  
42 *of Adulthood and Aging* 2005.  
43  
44  
45 21 van den Berg TIJ, Elders LAM, de Zwart BCH, Burdorf A. The effects of work-  
46 related and individual factors on the Work Ability Index: a systematic review. *Occup*  
47 *Environ Med* 2009;66:211.  
48  
49  
50 22 Ahlstrom L, Grimby-Ekman A, Hagberg M, Dellve L. The work ability index and  
51 single-item question: associations with sick leave, symptoms, and health--a  
52 prospective study of women on long-term sick leave. *Scand J Work Environ Health*  
53 2010;36:404-12.  
54  
55  
56 23 Lötters F, Burdorf A. Prognostic Factors for Duration of Sickness Absence due to  
57 Musculoskeletal Disorders. *Clin J Pain* 2006;22:212-221.  
58  
59  
60

- 1  
2  
3 24 Karels CH, Bierma-Zeinstra SM, Verhagen AP, Koes BW, Burdorf A. Sickness  
4 absence in patients with arm, neck and shoulder complaints presenting in physical  
5 therapy practice: 6 months follow-up. *Man Ther* 2010;15:476-481.  
6  
7  
8 25 Ariens GA, Bongers PM, Hoogendoorn WE, van der Wal G, van Mechelen W. High  
9 physical and psychosocial load at work and sickness absence due to neck pain. *Scand  
10 J Work Environ Health* 2002;28:222-31.  
11  
12  
13 26 Walton DM, Carroll LJ, Kasch H et al. An Overview of Systematic Reviews on  
14 Prognostic Factors in Neck Pain: Results from the International Collaboration on Neck  
15 Pain (ICON) Project. *Open Orthop J* 2013;7:494-505.  
16  
17  
18 27 Axén I, Bergström G, Bodin L. Using few and scattered time points for analysis of a  
19 variable course of pain can be misleading: an example using weekly text message  
20 data. *Spine J* 2014;14:1454-1459.  
21  
22  
23 28 Miranda H, Gold JE, Gore R, Punnett L. Recall of prior musculoskeletal pain. *Scand J  
24 Work Environ Health* 2006;32:294-9.  
25  
26  
27 29 Jung T, Wickrama KAS. An Introduction to Latent Class Growth Analysis and  
28 Growth Mixture Modeling. *Soc Personal Psychol Compass* 2008;2:302-317.  
29  
30  
31 30 Hallman DM, Nørregaard Rasmussen CD, Birk Jørgensen M, Holtermann A. Time  
32 course of neck-shoulder pain in workers: A longitudinal latent class growth analysis.  
33 *Scand J Work Environ Health* 2018;44:47-57.  
34  
35  
36 31 Jørgensen M, Korshøj M, Lagersted-Olsen J et al. Physical activities at work and risk  
37 of musculoskeletal pain and its consequences: protocol for a study with objective field  
38 measures among blue-collar workers. *BMC Musculoskelet Disord* 2013;14:1-9.  
39  
40  
41 32 Hallman DM, Birk Jørgensen M, Holtermann A. On the health paradox of  
42 occupational and leisure-time physical activity using objective measurements: Effects  
43 on autonomic imbalance. *PLoS One* 2017;12:e0177042.  
44  
45  
46 33 Hallman DM, Gupta N, Heiden M et al. Is prolonged sitting at work associated with  
47 the time course of neck-shoulder pain? A prospective study in Danish blue-collar  
48 workers. *BMJ Open* 2016;6:e012689.  
49  
50  
51 34 Ferreira-Valente MA, Pais-Ribeiro JL, Jensen MP. Validity of four pain intensity  
52 rating scales. *Pain* 2011;152:2399-2404.  
53  
54  
55 35 Dworkin RH, Turk DC, Farrar JT et al. Core outcome measures for chronic pain  
56 clinical trials: IMMPACT recommendations. *Pain* 2005;113:9-19.  
57  
58  
59 36 Keefe FJ, Linton SJ, Lefebvre JC. The Outcome Evaluation Questionnaire:  
60 Description and Initial Findings. *Scand J Behaviour Ther* 1992;21:19-33.

- 1  
2  
3 37 Johns G, Miraglia M. The reliability, validity, and accuracy of self-reported  
4 absenteeism from work: A meta-analysis. *J Occup Health Psychol* 2015;20:1-14.  
5  
6 38 Tuomi K, Ilmarinen J, Jahkola A, Katajarinne L, Tulkki A. *Work ability index*.  
7 Helsinki: Finnish institute of occupational health, 1998.  
8  
9 39 Neupane S, Miranda H, Virtanen P, Siukola A, Nygard CH. Multi-site pain and work  
10 ability among an industrial population. *Occup Med (Lond)* 2011;61:563-9.  
11  
12 40 Borg G. Borg's perceived exertion and pain scales. *Champaign, IL: Human Kinetics*  
13 1998.  
14  
15 41 Kuorinka I, Jonsson B, Kilbom A et al. Standardised Nordic questionnaires for the  
16 analysis of musculoskeletal symptoms. *Appl Ergon* 1987;18:233-237.  
17  
18 42 Neupane S, Leino-Arjas P, Nygård C-H, Oakman J, Virtanen P. Developmental  
19 pathways of multisite musculoskeletal pain: what is the influence of physical and  
20 psychosocial working conditions? *Occup Environ Med* 2017;74:468-475.  
21  
22 43 Hoffman L, Stawski RS. Persons as Contexts: Evaluating Between-Person and  
23 Within-Person Effects in Longitudinal Analysis. *Research in Human Development*  
24 2009;6:97-120.  
25  
26 44 Sarquis LMM, Coggon D, Ntani G et al. Classification of neck/shoulder pain in  
27 epidemiological research: a comparison of personal and occupational characteristics,  
28 disability, and prognosis among 12,195 workers from 18 countries. *Pain*  
29 2016;157:1028-1036.  
30  
31 45 Haukka E, Kaila-Kangas L, Ojajärvi A et al. Pain in multiple sites and sickness  
32 absence trajectories: A prospective study among Finns. *Pain* 2013;154:306-312.  
33  
34 46 Bugajska J, Sagan A. Chronic musculoskeletal disorders as risk factors for reduced  
35 work ability in younger and ageing workers. *Int J Occup Saf Ergon* 2014;20:607-15.  
36  
37 47 Mayer J, Kraus T, Ochsmann E. Longitudinal evidence for the association between  
38 work-related physical exposures and neck and/or shoulder complaints: a systematic  
39 review. *Int Arch Occup Environ Health* 2012;85:587-603.  
40  
41  
42  
43  
44  
45  
46  
47  
48  
49  
50  
51  
52  
53  
54  
55  
56  
57  
58  
59  
60

## Tables

**Table 1** Descriptive characteristics of the study population (n=748)

|                                              | N        | Median | IQR | Mean | SD   |
|----------------------------------------------|----------|--------|-----|------|------|
| Age (years)                                  | 748      |        |     | 44.8 | 9.6  |
| Men N (%)                                    | 411 (55) |        |     |      |      |
| BMI (kg×m <sup>2</sup> )                     | 732      |        |     | 27.3 | 4.8  |
| Seniority (years)                            | 722      |        |     | 13.5 | 10.3 |
| Administration workers N (%)                 | 128 (17) |        |     |      |      |
| Blue-collar workers N (%)                    | 620 (83) |        |     |      |      |
| Cleaning                                     | 115 (15) |        |     |      |      |
| Manufacturing                                | 448 (60) |        |     |      |      |
| Transportation                               | 57 (8)   |        |     |      |      |
| Physical work load at baseline (scale 1-10)  | 723      |        |     | 5.3  | 2.4  |
| Sick leave days                              |          |        |     |      |      |
| Baseline (days/month)                        | 741      | 0.0    | 0.0 | 0.3  | 1.9  |
| Last follow-up (days/month)                  | 655      | 0.0    | 0.0 | 0.4  | 2.5  |
| Total days (over all time points)            | 746      | 0.0    | 3.0 | 5.8  | 20.9 |
| Work ability (scale 0-10)                    |          |        |     |      |      |
| Baseline                                     | 646      | 9.0    | 2.0 | 8.5  | 2.0  |
| Last follow-up                               | 671      | 9.0    | 2.0 | 8.2  | 2.4  |
| Mean work ability (over all time points)     | 732      | 8.8    | 2.5 | 8.3  | 1.7  |
| NSP intensity (scale 0-10)                   |          |        |     |      |      |
| Baseline                                     | 748      | 2.0    | 5.0 | 3.0  | 2.7  |
| Last follow-up                               | 652      | 2.0    | 4.0 | 2.4  | 2.7  |
| Mean NSP intensity (over all time points)    | 748      | 2.0    | 3.6 | 2.6  | 2.3  |
| Number of pain regions at baseline (count)   | 745      | 1.0    | 3.0 | 1.7  | 1.5  |
| Compliance to SMS (missing responses, count) |          |        |     |      |      |
| NSP intensity                                | 748      | 0.0    | 1.0 | 1.2  | 2.7  |
| Sick leave                                   | 746      | 0.0    | 1.0 | 1.2  | 2.6  |
| Work ability                                 | 732      | 0.0    | 1.0 | 0.4  | 0.7  |

Abbreviations: BMI, body mass index; NSP, neck-shoulder pain; IQR, inter quartile range.

**Table 2. Association** of neck-shoulder pain (NSP) trajectory class with sick leave (days/month) and work ability (ordinal scale 0-10) over 1 year, referencing low NSP.

| GEE models<br>(classes) | N   | Sick leave |       |                |                | Work ability |       |                |                |
|-------------------------|-----|------------|-------|----------------|----------------|--------------|-------|----------------|----------------|
|                         |     | p-value    | RR    | 95%CI<br>Lower | 95%CI<br>Upper | p-value      | OR    | 95%CI<br>Lower | 95%CI<br>Upper |
| <b>Model 1</b>          |     |            |       |                |                |              |       |                |                |
| Low NSP                 | 292 |            | 1.00  |                |                |              | 1.00  |                |                |
| Moderate NSP            | 208 | <0.001     | 3.28  | 1.89           | 5.68           | <0.001       | 2.45  | 1.87           | 3.21           |
| Strong NSP              | 178 | <0.001     | 8.98  | 4.78           | 16.89          | <0.001       | 8.64  | 6.38           | 11.69          |
| Severe NSP              | 70  | <0.001     | 17.64 | 9.36           | 33.23          | <0.001       | 15.07 | 9.94           | 22.85          |
| <b>Model 2</b>          |     |            |       |                |                |              |       |                |                |
| Low NSP                 | 286 |            | 1.00  |                |                |              | 1.00  |                |                |
| Moderate NSP            | 204 | <0.001     | 3.25  | 1.87           | 5.64           | <0.001       | 2.40  | 1.83           | 3.16           |
| Strong NSP              | 174 | <0.001     | 8.61  | 4.54           | 16.33          | <0.001       | 9.03  | 6.62           | 12.31          |
| Severe NSP              | 68  | <0.001     | 16.00 | 8.17           | 31.34          | <0.001       | 14.77 | 9.63           | 22.66          |
| <b>Model 3</b>          |     |            |       |                |                |              |       |                |                |
| Low NSP                 | 277 |            | 1.00  |                |                |              | 1.00  |                |                |
| Moderate NSP            | 199 | <0.001     | 3.11  | 1.75           | 5.52           | <0.001       | 2.43  | 1.84           | 3.20           |
| Strong NSP              | 165 | <0.001     | 7.58  | 3.91           | 14.71          | <0.001       | 8.12  | 5.91           | 11.16          |
| Severe NSP              | 66  | <0.001     | 13.83 | 6.72           | 28.49          | <0.001       | 12.93 | 8.50           | 19.67          |

Relative risk (RR) estimates, indicating the relative increase in the number of days on sick leave per month, were obtained using Generalized Estimation Equation (GEE) with a Poisson distribution for days on sick-leave (measured at 4 week intervals). Odds ratios (OR), indicating the likelihood of a 1-unit reduction in work ability, were obtained using GEE with a multinomial distribution for work ability (measured at 12 week intervals).

Model 1: Unadjusted.

Model 2: Adjusted for age, gender and body mass index.

Model 3: Additionally adjusted for occupational sector (four categories, referencing administration) and physical work load.

**Table 3.** Within-person effect of temporal fluctuations in neck-shoulder pain (NSP, scale 0-10) on sick leave (days/month) and work ability (scale 0-10) over 1 year

| GEE models    | Sick leave |         |      |        |       | Work ability |      |        |       |  |
|---------------|------------|---------|------|--------|-------|--------------|------|--------|-------|--|
|               | N          | p-value | RR   | 95% CI |       | p-value      | OR   | 95% CI |       |  |
|               |            |         |      | Lower  | Upper |              |      | Lower  | Upper |  |
| NSP intensity |            |         |      |        |       |              |      |        |       |  |
| Model 1       | 248        | 0.008   | 1.12 | 1.03   | 1.21  | 0.005        | 1.11 | 1.03   | 1.19  |  |
| Model 2       | 242        | 0.008   | 1.12 | 1.03   | 1.21  | 0.009        | 1.11 | 1.03   | 1.19  |  |
| Model 3       | 231        | 0.011   | 1.11 | 1.02   | 1.21  | 0.002        | 1.13 | 1.04   | 1.21  |  |

Relative risk (RR) estimates, indicating the relative increase in the number of days on sick leave per month, were obtained using Generalized Estimation Equation (GEE) with a Poisson distribution for days on sick-leave (measured at 4 week intervals). Odds ratios (OR), indicating the likelihood of a 1-unit reduction in work ability, were obtained using GEE with a multinomial distribution for work ability (measured at 12 week intervals). Estimates indicate the within-person effect of change in pain intensity on change in sick leave and work ability per month.

Model 1: adjusted for the person mean pain intensity across time points.

Model 2: additionally adjusted for age, gender and BMI.

Model 3: additionally adjusted for occupational sector and physical work load.



## Figure legends

**Figure 1.** Mean 1-year trajectories of days on sick leave obtained in the fully adjusted model in each trajectory class of neck-shoulder pain (NSP). The x-axis represents the 14 pain ratings over 1 year. The y-axis represents the mean predicted number of days on sick leave per month.

**Figure 2.** Association between temporal fluctuations in neck-shoulder pain (NSP) and the outcomes sick leave and work ability. The x-axis represents the difference in pain intensity scores from the person mean pain intensity across time points. The y-axis represents the predicted number of days on sick leave per month (Fig. 2a) and the predicted cumulative probability of poor work ability (Fig. 2b), as defined by the cut-point  $\leq 7$  (scale 0-10).<sup>39</sup>

## Supplemental Figures

**Supplemental Figure A.** Mean predicted intensity of neck-shoulder pain (NSP) over 1 year in the four trajectory classes of NSP obtained using Latent class growth analysis.

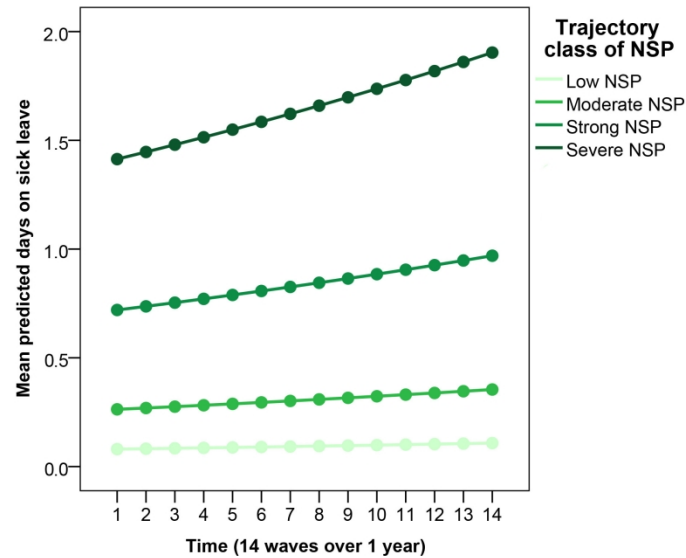

Figure 1.

Figure 1. Mean 1-year trajectories of days on sick leave obtained in the fully adjusted model in each trajectory class of neck-shoulder pain (NSP). The x-axis represents the 14 pain ratings over 1 year. The y-axis represents the mean predicted number of days on sick leave per month.

215x279mm (300 x 300 DPI)



Figure 2

Figure 2. Association between temporal fluctuations in neck-shoulder pain (NSP) and the outcomes sick leave and work ability. The x-axis represents the difference in pain intensity scores from the person mean pain intensity across time points. The y-axis represents the predicted number of days on sick leave per month (Fig. 2a) and the predicted cumulative probability of poor work ability (Fig. 2b), as defined by the cut-point  $\leq 7$  (scale 0-10).

350x199mm (300 x 300 DPI)

1  
2  
3  
4  
5  
6  
7  
8  
9  
10  
11  
12  
13  
14  
15  
16  
17  
18  
19  
20  
21  
22  
23  
24  
25  
26  
27  
28  
29  
30  
31  
32  
33  
34  
35  
36  
37  
38  
39  
40  
41  
42  
43  
44  
45  
46  
47  
48  
49  
50  
51  
52  
53  
54  
55  
56  
57  
58  
59  
60

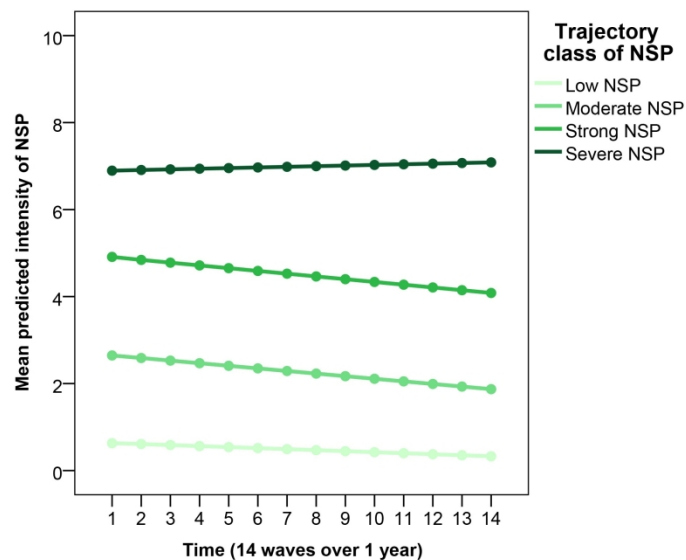

Supplemental Figure A.

Supplemental Figure A. Mean predicted intensity of neck-shoulder pain (NSP) over 1 year in the four trajectory classes of NSP obtained using Latent class growth analysis.

## STROBE Statement—checklist of items that should be included in reports of observational studies

|                              | Item No | Recommendation                                                                                                                                                                                                                                                                                                                                                                                                                                                         | Check yes/no                                              |
|------------------------------|---------|------------------------------------------------------------------------------------------------------------------------------------------------------------------------------------------------------------------------------------------------------------------------------------------------------------------------------------------------------------------------------------------------------------------------------------------------------------------------|-----------------------------------------------------------|
| <b>Title and abstract</b>    | 1       | (a) Indicate the study's design with a commonly used term in the title or the abstract                                                                                                                                                                                                                                                                                                                                                                                 | yes                                                       |
|                              |         | (b) Provide in the abstract an informative and balanced summary of what was done and what was found                                                                                                                                                                                                                                                                                                                                                                    | yes                                                       |
| <b>Introduction</b>          |         |                                                                                                                                                                                                                                                                                                                                                                                                                                                                        |                                                           |
| Background/rationale         | 2       | Explain the scientific background and rationale for the investigation being reported                                                                                                                                                                                                                                                                                                                                                                                   | yes, p4-5                                                 |
| Objectives                   | 3       | State specific objectives, including any prespecified hypotheses                                                                                                                                                                                                                                                                                                                                                                                                       | yes, p5                                                   |
| <b>Methods</b>               |         |                                                                                                                                                                                                                                                                                                                                                                                                                                                                        |                                                           |
| Study design                 | 4       | Present key elements of study design early in the paper                                                                                                                                                                                                                                                                                                                                                                                                                | yes, p5                                                   |
| Setting                      | 5       | Describe the setting, locations, and relevant dates, including periods of recruitment, exposure, follow-up, and data collection                                                                                                                                                                                                                                                                                                                                        | yes, p5                                                   |
| Participants                 | 6       | (a) <i>Cohort study</i> —Give the eligibility criteria, and the sources and methods of selection of participants. Describe methods of follow-up<br><i>Case-control study</i> —Give the eligibility criteria, and the sources and methods of case ascertainment and control selection. Give the rationale for the choice of cases and controls<br><i>Cross-sectional study</i> —Give the eligibility criteria, and the sources and methods of selection of participants | a) yes, p5-6                                              |
|                              |         | (b) <i>Cohort study</i> —For matched studies, give matching criteria and number of exposed and unexposed<br><i>Case-control study</i> —For matched studies, give matching criteria and the number of controls per case                                                                                                                                                                                                                                                 |                                                           |
| Variables                    | 7       | Clearly define all outcomes, exposures, predictors, potential confounders, and effect modifiers. Give diagnostic criteria, if applicable                                                                                                                                                                                                                                                                                                                               | yes, p6-8                                                 |
| Data sources/<br>measurement | 8*      | For each variable of interest, give sources of data and details of methods of assessment (measurement). Describe comparability of assessment methods if there is more than one group                                                                                                                                                                                                                                                                                   | yes, p6-8                                                 |
| Bias                         | 9       | Describe any efforts to address potential sources of bias                                                                                                                                                                                                                                                                                                                                                                                                              | yes, p7-8 and 9<br>(confounders and statistical analyses) |
| Study size                   | 10      | Explain how the study size was arrived at                                                                                                                                                                                                                                                                                                                                                                                                                              | yes, p6                                                   |
| Quantitative variables       | 11      | Explain how quantitative variables were handled in the analyses. If applicable, describe which groupings were chosen and why                                                                                                                                                                                                                                                                                                                                           | yes, p8-9                                                 |
| Statistical methods          | 12      | (a) Describe all statistical methods, including those used to control for confounding                                                                                                                                                                                                                                                                                                                                                                                  | yes p8-9                                                  |

|    |                                                                  |                  |
|----|------------------------------------------------------------------|------------------|
| 1  |                                                                  |                  |
| 2  | (b) Describe any methods used to examine subgroups and           | yes, p8-9        |
| 3  | interactions                                                     |                  |
| 4  | (c) Explain how missing data were addressed                      | yes, p8          |
| 5  | (d) <i>Cohort study</i> —If applicable, explain how loss to      | yes, p8; page 11 |
| 6  | follow-up was addressed                                          |                  |
| 7  | <i>Case-control study</i> —If applicable, explain how matching   |                  |
| 8  | of cases and controls was addressed                              |                  |
| 9  | <i>Cross-sectional study</i> —If applicable, describe analytical |                  |
| 10 | methods taking account of sampling strategy                      |                  |
| 11 |                                                                  |                  |
| 12 | (e) Describe any sensitivity analyses                            |                  |
| 13 |                                                                  |                  |

Continued on next page

For peer review only

| <b>Results</b>           |     |                                                                                                                                                                                                                                                                                                                                                                                                               | <b>Yes/no</b>                                             |
|--------------------------|-----|---------------------------------------------------------------------------------------------------------------------------------------------------------------------------------------------------------------------------------------------------------------------------------------------------------------------------------------------------------------------------------------------------------------|-----------------------------------------------------------|
| Participants             | 13* | (a) Report numbers of individuals at each stage of study—eg numbers potentially eligible, examined for eligibility, confirmed eligible, included in the study, completing follow-up, and analysed<br>(b) Give reasons for non-participation at each stage<br>(c) Consider use of a flow diagram                                                                                                               | Yes, p6 (flow) p 11 (compliance), and results tables 1-3. |
| Descriptive data         | 14* | (a) Give characteristics of study participants (eg demographic, clinical, social) and information on exposures and potential confounders<br>(b) Indicate number of participants with missing data for each variable of interest<br>(c) <i>Cohort study</i> —Summarise follow-up time (eg, average and total amount)                                                                                           | Yes, p11<br>Yes, p11 (table 1)                            |
| Outcome data             | 15* | <i>Cohort study</i> —Report numbers of outcome events or summary measures over time<br><i>Case-control study</i> —Report numbers in each exposure category, or summary measures of exposure<br><i>Cross-sectional study</i> —Report numbers of outcome events or summary measures                                                                                                                             | yes, p 11 (table 1)                                       |
| Main results             | 16  | (a) Give unadjusted estimates and, if applicable, confounder-adjusted estimates and their precision (eg, 95% confidence interval). Make clear which confounders were adjusted for and why they were included<br>(b) Report category boundaries when continuous variables were categorized<br>(c) If relevant, consider translating estimates of relative risk into absolute risk for a meaningful time period | Yes, tables 2-3<br>n/a                                    |
| Other analyses           | 17  | Report other analyses done—eg analyses of subgroups and interactions, and sensitivity analyses                                                                                                                                                                                                                                                                                                                | statistical methods and results                           |
| <b>Discussion</b>        |     |                                                                                                                                                                                                                                                                                                                                                                                                               |                                                           |
| Key results              | 18  | Summarise key results with reference to study objectives                                                                                                                                                                                                                                                                                                                                                      | yes, p15                                                  |
| Limitations              | 19  | Discuss limitations of the study, taking into account sources of potential bias or imprecision. Discuss both direction and magnitude of any potential bias                                                                                                                                                                                                                                                    | yes, p17                                                  |
| Interpretation           | 20  | Give a cautious overall interpretation of results considering objectives, limitations, multiplicity of analyses, results from similar studies, and other relevant evidence                                                                                                                                                                                                                                    | yes, p18                                                  |
| Generalisability         | 21  | Discuss the generalisability (external validity) of the study results                                                                                                                                                                                                                                                                                                                                         | yes, p17 (last paragraph)                                 |
| <b>Other information</b> |     |                                                                                                                                                                                                                                                                                                                                                                                                               |                                                           |
| Funding                  | 22  | Give the source of funding and the role of the funders for the present study and, if applicable, for the original study on which the present article is based                                                                                                                                                                                                                                                 | yes, p18                                                  |

\*Give information separately for cases and controls in case-control studies and, if applicable, for exposed and unexposed groups in cohort and cross-sectional studies.

1  
2 **Note:** An Explanation and Elaboration article discusses each checklist item and gives methodological background and  
3 published examples of transparent reporting. The STROBE checklist is best used in conjunction with this article (freely  
4 available on the Web sites of PLoS Medicine at <http://www.plosmedicine.org/>, Annals of Internal Medicine at  
5 <http://www.annals.org/>, and Epidemiology at <http://www.epidem.com/>). Information on the STROBE Initiative is  
6 available at [www.strobe-statement.org](http://www.strobe-statement.org).  
7  
8  
9  
10  
11  
12  
13  
14  
15  
16  
17  
18  
19  
20  
21  
22  
23  
24  
25  
26  
27  
28  
29  
30  
31  
32  
33  
34  
35  
36  
37  
38  
39  
40  
41  
42  
43  
44  
45  
46  
47  
48  
49  
50  
51  
52  
53  
54  
55  
56  
57  
58  
59  
60



# BMJ Open

## Are trajectories of neck–shoulder pain associated with sick leave and work ability in workers? A one-year prospective study

|                                 |                                                                                                                                                                                                                                                                                                                                                                                                               |
|---------------------------------|---------------------------------------------------------------------------------------------------------------------------------------------------------------------------------------------------------------------------------------------------------------------------------------------------------------------------------------------------------------------------------------------------------------|
| Journal:                        | <i>BMJ Open</i>                                                                                                                                                                                                                                                                                                                                                                                               |
| Manuscript ID                   | bmjopen-2018-022006.R3                                                                                                                                                                                                                                                                                                                                                                                        |
| Article Type:                   | Research                                                                                                                                                                                                                                                                                                                                                                                                      |
| Date Submitted by the Author:   | 25-Jan-2019                                                                                                                                                                                                                                                                                                                                                                                                   |
| Complete List of Authors:       | Hallman, David; University of Gävle, Centre for Musculoskeletal Research<br>Holtermann, Andreas; National Research Centre for the Working Environment,<br>Dencker-Larsen, Sofie; National Research Centre for the Working Environment<br>Birk Jørgensen, Marie; National Research Centre for the Working Environment<br>Nørregaard Rasmussen, Charlotte; National Research Centre for the Working Environment |
| <b>Primary Subject Heading</b>: | Occupational and environmental medicine                                                                                                                                                                                                                                                                                                                                                                       |
| Secondary Subject Heading:      | Public health                                                                                                                                                                                                                                                                                                                                                                                                 |
| Keywords:                       | Chronic pain, LCGA, Neck pain, Occupational, Pain trajectories                                                                                                                                                                                                                                                                                                                                                |
|                                 |                                                                                                                                                                                                                                                                                                                                                                                                               |

SCHOLARONE™  
Manuscripts

# **Title: Are trajectories of neck–shoulder pain associated with sick leave and work ability in workers? A one-year prospective study**

Authors: David M Hallman<sup>1\*</sup>, Andreas Holtermann<sup>2,3</sup>, Sofie Dencker-Larsen<sup>2</sup>, Marie Birk Jørgensen<sup>2</sup>, Charlotte Diana Nørregaard Rasmussen<sup>2</sup>

## Affiliations:

<sup>1</sup>Centre for Musculoskeletal Research, Department of Occupational and Public Health Sciences, University of Gävle, Gävle, Sweden

<sup>2</sup>National Research Centre for the Working Environment, Copenhagen, Denmark

<sup>3</sup>Department of Sports Science and Clinical Biomechanics, University of Southern Denmark, Odense, Denmark

## \*Corresponding author:

David M Hallman, University of Gävle, Kungsbäcksvägen 47, 80176 Gävle, Sweden; Email: [david.hallman@hig.se](mailto: david.hallman@hig.se); Phone: +46 736266413

Funding: The study was supported by grants from the Danish government (Satspulje) and the Swedish Research Council for Health, Working Life and Welfare (Forte Dnr.2009–1761).

Conflict of interest: None to declare.

## Author contributions:

DMH contributed to the statistical data analyses and drafting of the manuscript. AH and MBJ contributed to the conception, design, data collection and funding of the full DPHACTO study. All authors (DMH, AH, SDL, MBJ, and CDNR) contributed to the conception of this study, discussed the results and commented on the manuscript.

## Data sharing statement:

Additional data can be accessed on request by email ([aho@arbejdsmiljoforskning.dk](mailto: aho@arbejdsmiljoforskning.dk)).

The manuscript contains about 4300 words, 3 tables, 2 figures, and 1 Supplemental figure.

## Abstract

### Objectives

The study aimed to determine the extent to which latent trajectories of neck-shoulder pain (NSP) are associated with self-reported sick leave and work ability based on frequent repeated measures over 1 year in an occupational population.

### Methods

This longitudinal study included 748 Danish workers (blue-collar, n=620; white collar, n=128). A questionnaire was administered to collect data on personal and occupational factors at baseline. Text messages were used for repeated measurements of NSP intensity (scale 0-10) over 1 year (14 waves in total). Simultaneously, self-reported sick leave (days/month) due to pain was assessed at four week intervals, while work ability (scale 0-10) was assessed using a single item (work ability index) at 12 week intervals over the year. Trajectories of NSP, distinguished by latent class growth analysis (LCGA), were used as predictors of sick leave and work ability in generalized estimation equations with multiple adjustments.

### Results

Sick leave increased and work ability decreased across all NSP trajectory classes (low, moderate, strong fluctuating, and severe persistent pain intensity). In the adjusted model, the estimated number of days on sick leave was 1.5 days/month for severe persistent NSP compared with 0.1 days/month for low NSP (RR=13.8, 95%CI 6.7–28.5). Similarly, work ability decreased markedly for severe persistent NSP (OR=12.9, 95%CI 8.5–19.7; median 7.1) compared with low NSP (median 9.5).

### Conclusion

Severe persistent NSP was associated with sick leave and poor work ability over 1 year among workers. Preventive strategies aiming at reducing severe persistent NSP among working populations are needed.

**Keywords:** Chronic pain; LCGA; Neck pain; Occupational; Pain trajectories

### Strengths and limitations of this study

- Some of the strengths of this study are:
  - Frequent repeated assessment of neck-shoulder pain, sick leave and work ability over 1 year.
  - High response rate during each month of follow-up.
- One of the limitations of this study was that sick leave was measured using self-report.

For peer review only

## Introduction

Neck-shoulder pain (NSP) is a common condition, with annual prevalence rates between 27% and 48% in different working populations.<sup>1</sup> NSP is one of the leading causes of years lived with disability worldwide,<sup>2</sup> and is associated with reduced work ability<sup>3</sup> and high sick leave rates.<sup>4,5</sup> In workers with NSP, 20% had at least one spell of sick leave in one year.<sup>4</sup> Sick leave risks are higher in workers with more severe NSP intensity.<sup>6</sup> The economic burden of NSP on organizations and society is considerable.<sup>7-9</sup> The estimated total cost of neck pain in The Netherlands in 1996 was 686 million US dollars,<sup>7</sup> and the estimated total cost of both neck and back pain in Sweden in 2001 was 1% of the gross national product (GNP).<sup>9</sup>

NSP is considered a heterogeneous condition ranging from very mild symptoms to severe chronic pain<sup>10</sup> with a substantial individual variability in progression over time.<sup>11-13</sup> This heterogeneity may, however, comprise homogenous sub-populations with distinct patterns of pain, unique risk factors and different underlying pathophysiology.<sup>14</sup> Revealing such sub-populations is likely important for early identification, establishing risk factors, and improving prevention and treatment.<sup>15</sup> However, most existing studies have been conducted on patients with low back pain, e.g.,<sup>15-17</sup> while studies identifying and describing the patterns of NSP in working populations with a wide range of pain severities are sparse. Also, there is a lack of research on the predictive value of NSP sub-populations; which is crucial for understanding the extent to which NSP sub-populations are of clinical and occupational relevance regarding intervention and treatment. Thus, it is important for research and occupational and clinical practice to distinguish sub-populations of workers with different trajectories of NSP (e.g. severity, temporal variability and time course) while assessing their predictive value against core prognostic outcomes, such as sick leave and work ability.<sup>4, 18, 19</sup>

Work ability, as defined as the balance between human resources and work demands,<sup>20</sup> is determined by multiple factors.<sup>21</sup> The perception of poor work ability is associated with sick leave and early retirement.<sup>22</sup> Sick leave due to pain is likely multifactorial, and several personal and work related (physical and psychosocial) factors have been identified as potential determinants of increased risks.<sup>4, 19, 23, 24</sup> High physical workload is associated with poor work ability and occurrence of sick leave due to pain,<sup>4, 25</sup> and may hamper return to work.<sup>23</sup> Thus, the level of physical workload is a potential moderator of the relationship of NSP trajectories with work ability and sick leave.

1  
2  
3  
4  
5 Most previous studies on the prognosis of NSP have relied only on few measurements in time  
6 interspersed by long intervals, e.g. years.<sup>11 26</sup> Such studies are not designed to capture the  
7 detailed time course (trajectory) or temporal fluctuations in NSP (e.g. between weeks or  
8 months). In contrast, frequent repeated measurements of pain facilitate accurate and precise  
9 identification of individual pain trajectories<sup>27</sup> and minimize recall bias.<sup>28</sup>

10  
11  
12  
13  
14  
15 Latent class growth analysis (LCGA) is a common statistical approach for identifying  
16 homogenous sub-populations (latent classes) based on individual growth parameters (i.e.  
17 intercept, slope and residual variance) in repeated measures data.<sup>29</sup> We have previously used  
18 LCGA to distinguish trajectory classes of NSP among the current population of workers based  
19 on frequent repeated measurements of NSP over 1 year.<sup>30</sup> We identified six distinct  
20 trajectories of NSP ranging from “asymptomatic” (prevalence 11%) to “severe persistent  
21 NSP” (9%). Several personal and occupational factors, as well as symptom characteristics at  
22 baseline predicted trajectory class membership. However, understanding the occupational and  
23 clinical relevance of trajectories of NSP requires a determination of their predictive value  
24 against core occupational and clinical outcomes. Particularly, identifying NSP trajectories  
25 associated with unfavorable outcomes would likely aid targeted prevention and treatment.

26  
27  
28  
29  
30  
31  
32  
33  
34  
35  
36 The aim of this study is to determine the extent to which latent trajectories of NSP are  
37 associated with self-reported sick leave due to musculoskeletal pain and with work ability  
38 based on frequent repeated measures over 1 year in an occupational population. A second aim  
39 is to investigate the temporal association (within person) between fluctuations in NSP and the  
40 outcomes sick leave and work ability.

## 41 42 43 44 45 46 **Methods**

### 47 48 49 **Study design**

50 This is a prospective study using data from the Danish Physical activity cohort with objective  
51 measurements (DPHacto). The study protocol for the cohort is reported in detail elsewhere.<sup>31</sup>  
52 Data collection took place from April 2012 to May 2014 at 15 Danish companies, including  
53 workers in four occupational sectors (cleaning, manufacturing, transportation and office  
54 work/administration). The initial contact and recruitment of companies were performed in  
55  
56  
57  
58  
59  
60

1  
2  
3 collaboration with a large Danish union. The companies were selected to represent blue-collar  
4 occupations with different levels of physical demands at work.  
5  
6  
7

8 Baseline data collection consisted of a brief web-based questionnaire, a standard health  
9 examination and objective diurnal measurements of physical activity and heart rate (presented  
10 elsewhere.<sup>32 33</sup> Prospective self-reported data on musculoskeletal pain, sick leave due to pain  
11 and work ability was collected repeatedly over 12 months using text messages.  
12  
13  
14  
15

### 16 **Study population**

17 The inclusion criterion for participation was current employment within any of the recruited  
18 work places. Exclusion criteria were holding a managing position or being pregnant or a  
19 student/trainee. In addition, workers not responding to the baseline questionnaire and/or the  
20 prospective measurements were excluded.  
21  
22  
23  
24  
25

26 Among the 2107 invited workers, 1119 agreed to participate and 32 of them were excluded  
27 due to holding a managing position (n=17) or being pregnant (n=2) or a student/trainee  
28 (n=13). Of the remaining 1087 eligible workers, 782 responded to the questionnaire and 748  
29 took part in the prospective measurements from baseline. Thus, the final study sample  
30 consisted of 748 workers (blue-collar, n=620; white collar, n=128). Descriptive characteristics  
31 of the study population are shown in Table 1.  
32  
33  
34  
35  
36  
37  
38

39 All participants provided their written informed consent prior to participation. The present  
40 study was conducted according to the Declaration of Helsinki, approved by the Danish Data  
41 Protection Agency, and evaluated by the Regional Ethics Committee in Copenhagen,  
42 Denmark (H-2-2012-011).  
43  
44  
45  
46  
47

### 48 **Repeated assessment using text messages**

49 Text messages (SMS) were used to assess self-reported pain intensity in the neck-shoulder  
50 region, days on sick leave and work ability using the commercial software “SMS-Track”  
51 (<https://sms-track.com/>). Starting at baseline, data on NSP and sick leave were collected at  
52 four week intervals (14 waves), while data on work ability were collected at 12 week intervals  
53 (4 waves in total) during the 1-year study. The SMS were sent on Sundays, with a reminder  
54 the following day.  
55  
56  
57  
58  
59  
60

### Neck-shoulder pain

Pain intensity in the neck-shoulder region (NSP) the past month was assessed using an 11-point numeric rating scale (NRS), which ranges from 0 (“no pain”) to 10 (“worst pain imaginable”). The worker responded to the question “*rate the worst pain you have experienced in your neck/shoulders within the past month?*” The NRS is a reliable and valid instrument for assessing pain intensity<sup>34</sup> and is recommended as an outcome in clinical trials.<sup>35</sup>

### Sick leave

Sick-leave due to pain was assessed using a single-item from the validated Outcome Evaluation Questionnaire<sup>36</sup>: “*Within the past month, how many days have you been absent from work due to pain in muscles or joints?*” with response categories ranging from 0 to 31 days. Based on a recent meta-analysis, self-reported sick leave demonstrates good test-retest reliability and reasonably high convergent validity against records.<sup>37</sup>

### Work ability

Work ability was assessed using a validated single item<sup>22</sup> from the work ability index.<sup>38</sup> The worker responded to the question “*Please rate your present work ability?*” with response categories ranging from 0 (unable to work) to 10 (“work ability as its best”). A score  $\leq 7$  denotes poor work ability.<sup>39</sup>

### Assessment of possible confounders and effect modifiers

Theoretical assumptions and empirical evidence were used to select possible confounders and effect modifiers which were accounted for in the statistical analyses. The following variables were measured at baseline as previously described<sup>30</sup>: age (years,) and gender (male or female) based on civil registration number, body mass index (BMI) based on objectively measured height and weight, occupational sector (manufacturing, cleaning, transportation, and administration/office work within the same workplaces), and seniority in the current job (years). Physical work load was measured by the question “*How physically demanding do you normally consider your present work?*” using a ten-point (1-10) response scale modified from Borg,<sup>40</sup> with higher values indicating higher physical demands. Multisite pain was measured based on the Standardized Nordic questionnaire for the analysis of musculoskeletal symptoms<sup>41</sup> asking about pain intensity (NRS, scale 0-10) during the past three months in



1  
2  
3 seven different anatomical areas (i.e. neck/shoulders, elbows, hands/wrists, lower back, hips,  
4 knees, and feet/ankles). A cut-point of >2 was used to indicate the occurrence of pain,  
5 whereby the number of pain sites was determined.<sup>42</sup> Since the relationship between NSP, sick  
6 leave and work ability may depend on the level of physical demands at work, physical work  
7 load was considered both a confounder and an effect modifier, while the other variables were  
8 solely included as possible confounders.  
9  
10  
11  
12  
13

### 14 15 **Statistical analyses**

16  
17 Growth trajectories (latent classes) of the intensity in NSP were identified using LCGA in  
18 Latent Gold version 5.1 (Statistical innovations Belmont, MA, USA). The LCGA procedure  
19 and the resulting trajectory classes of NSP are described in a previous study on the same  
20 population.<sup>30</sup> In brief, the LCGA assigns individuals to latent classes based on maximum  
21 posterior probabilities. That is, using growth parameters (i.e. intercept, slope and residual  
22 variance) reflecting change in an observed variable (i.e. pain intensity) over time, LCGA  
23 assigns individuals to latent classes (categorical variable) assuming homogeneity within class  
24 and heterogeneity between classes.<sup>29 43</sup>  
25  
26  
27  
28  
29  
30  
31

32  
33 The LCGA models were performed using Time (14 waves over 1 year) as a continuous linear  
34 predictor and NSP intensity as a continuous dependent variable. Missing values were  
35 considered as missing at random and included in all models without imputations. The optimal  
36 number of classes was determined based on appropriate model fit indices, i.e. Bayesian  
37 information criterion (BIC), Entropy and Bootstrap log likelihood ratio (BLRT), which were  
38 obtained in consecutive LCGA models with 1-10 a priori class solutions. Then, the models  
39 were evaluated based on the estimated growth parameters and clinical distinction between the  
40 identified classes. The identified trajectories of NSP were used as an independent variable in  
41 further statistical analyses of associations with sick leave and work ability over the same year.  
42  
43  
44  
45  
46  
47  
48

49  
50 The association of NSP trajectories with sick leave (SMS at four week intervals over 1 year)  
51 and work ability (SMS each quarter) during the same year was determined using Generalized  
52 Estimation Equation (GEE) models with an auto regressive first order (AR1) covariance  
53 structure to account for weaker correlations with increasing distance between time points.  
54  
55  
56  
57

58  
59 The association of NSP trajectories with sick-leave (days/month) was tested using GEE  
60 models with a Poisson distribution and a log link function. Fixed factors were NSP trajectory

1  
2  
3 class (categorical variable), time (continuous variable, 14 time points) and the interaction  
4 between trajectory class and time. The interaction term was kept in the model if it was  
5 significant ( $p < 0.05$ ). We tested both linear and quadratic time trends, but decided on a linear  
6 model since the quadratic model did not improve model fit. The primary GEE models were  
7 constructed in three steps: (model 1) unadjusted, (model 2) adjusted for age, gender and BMI,  
8 and (model 3) additionally adjusted for occupational sector (four categories) and physical  
9 work load (continuous variable). Then, we tested if the results of the primary models were  
10 consistent when accounting for baseline pain intensity and comorbidity of multisite pain, as  
11 they may be associated with both NSP trajectories and the outcomes. Thus, secondary models  
12 were estimated with additional adjustment for the intensity of NSP (model 4) and the number  
13 of pain regions (model 5) at baseline (past three months). Finally, to test for potential effect  
14 modification by physical work load, model 3 was re-run with an interaction between NSP  
15 trajectory class and physical work load (model 6).

16  
17  
18  
19  
20  
21  
22  
23  
24  
25  
26  
27 The association of NSP trajectory class with work ability (dependent variable, ordinal scale)  
28 was tested using GEE models with a multinomial distribution and a cumulative logit link  
29 function. Fixed factors were NSP trajectory class (categorical variable), time (linear  
30 continuous variable, 4 time points), and the interaction between trajectory class and time,  
31 which was kept only if reaching significance ( $p < 0.05$ ). The models were constructed with and  
32 without adjustment for covariates, as explained above.

33  
34  
35  
36  
37  
38  
39 Additional GEE models were constructed to investigate the within person association of  
40 temporal fluctuations in the intensity of NSP with sick leave and work ability (outcomes). To  
41 partition the within and between subjects variances in the predictor (intensity of NSP), the  
42 mean pain intensity score across all time points was determined for each individual. Then, the  
43 person mean pain score was subtracted from each repeated pain rating and used as an  
44 independent variable (within subject effect), while adjusting for the person mean pain as a  
45 covariate (between-subjects effect).<sup>43</sup> Thus, these GEE models were constructed with three  
46 fixed factors: (i) time (14 waves), (ii) the person mean pain intensity across waves, and (iii)  
47 the difference from the mean pain intensity during each wave for the individual (within  
48 subject effect). The within-subject effect would then reflect the population averaged  
49 association with the outcome for each unit change in pain intensity per month for the  
50 individual. Model specifications for sick leave and work ability were the same as above. The  
51  
52  
53  
54  
55  
56  
57  
58  
59  
60

1  
2  
3 models were estimated with and without adjustment for potential confounders as explained  
4 above.  
5  
6  
7

8 The GEE models were estimated using SPSS software version 22 (IBM, USA). For each  
9 model, we derived the exponential estimate, i.e. relative risk (RR) and odds ratio (OR) for  
10 sick leave and work ability, respectively, and 95% confidence intervals (CI). P-values <0.05  
11 were considered significant.  
12  
13  
14  
15

### 16 **Patient and public involvement**

17  
18 No patients or public were directly involved in setting the research questions and outcomes,  
19 design and conduct of this study, or interpretation of the results. Results will be disseminated  
20 to the participants at <http://www.nfa.dk/>.  
21  
22  
23  
24  
25

## 26 **Results**

### 27 **Characteristics of the study population**

28  
29 Characteristics of the study population are shown in Table 1. The study sample consisted of  
30 both males and females, and most were blue-collar workers. The workers were on average of  
31 middle age, slightly overweight, and had been in their current job for 14 years. The mean  
32 intensity of NSP across all time points was 2.6 (scale 0-10). Most of the workers rated high  
33 work ability (>7, scale 0-10) across the study period, while the average worker accumulated 6  
34 days on sick leave due to pain over 1 year, although with a considerable dispersion between  
35 individuals. Compliance to the repeated measurements (text messages) in the study was high;  
36 on average, the workers had 1.2 missing responses to pain and sick leave (14 waves) and 0.4  
37 missing responses to work ability (4 waves) (Table 1). The amount of missing data increased  
38 over time. During the second wave, the response rates were 96%, 96% and 93% for pain, sick  
39 leave and work ability, respectively, while the response rates dropped to 87%, 88% and 90%  
40 during the last wave.  
41  
42  
43  
44  
45  
46  
47  
48  
49  
50  
51

52  
53  
54  
55 [Insert Table 1 about here]  
56  
57  
58  
59  
60

### Identified latent trajectories of NSP

Based on model fit indices (BIC, Entropy and BLRT) and distinction between classes obtained from consecutive LCGA models, a six-class solution was chosen.<sup>30</sup> The growth pattern and prevalence (%) of the six identified trajectory classes of NSP were characterized as follows (see also Supplemental Figure A): class 1, *asymptomatic* (11%); class 2, *very low NSP* (10%); class 3, *low recovering NSP* (18%); class 4, *moderate fluctuating NSP* (28%); class 5, *strong fluctuating NSP* (24 %); and class 6, *severe persistent NSP* (9%). The trajectory classes with lower intensities of NSP (classes 1-3) did not differ in total days on sick leave or mean work ability over 1 year; and the occurrence of sick leave was very low, while work ability was high across the three classes. Thus, classes 1-3 were merged into a single category (low NSP 39%), which was used as a reference in further analyses.

### Association between NSP trajectory classes and sick leave over 1 year

Estimates of the association of NSP trajectories with sick leave due to pain (days /month) are shown in Table 2. There was no significant time effect on sick leave (unadjusted RR=1.02, 95%CI 0.99-1.06). Thus, the interaction between NSP trajectory class and time was discarded from the models.

Based on the fully adjusted model (Table 2, model 3) referencing low NSP, the relative risk of sick leave increased for moderate (RR=3.1, 95%CI 1.8–5.5), strong fluctuating (RR=7.6, 95%CI 3.9–14.7), and severe persistent NSP (RR=13.8, 95%CI 6.7–28.5). On average, the estimated number of days on sick leave per month was 0.1 (95%CI 0.1–0.15) for low NSP, 0.3 (95%CI 0.2–0.4) for moderate NSP, 0.8 (95%CI 0.5–1.2) for strong NSP, and 1.5 (95%CI 1.0–2.4) for severe persistent NSP. Predicted values of sick leave for each wave over 1 year are shown in Figure 1.

Additional adjustment for multisite pain showed similar estimates for moderate NSP (RR=3.0, 95%CI 1.7–5.4), strong fluctuating NSP (RR=7.2, 95%CI 3.5–14.5) and severe persistent NSP (RR=13.1, 95%CI 6.1–28). Also, adjustment for baseline pain intensity revealed stronger estimates for moderate NSP (RR=3.7, 95%CI 2.1–6.8), strong fluctuating NSP (RR=10.9, 95%CI 5.1–23.7) and severe persistent NSP (RR=24.5, 95%CI 10.4–57.9), although with wider CIs.

There was no significant interaction between NSP trajectory class and physical work load on sick leave.

[Insert Figure 1 about here]

### **Association between NSP trajectory classes and work ability over 1 year**

Estimates of the association between trajectories of NSP and work ability (measured each quarter) are shown in Table 2.

There was a small time effect indicating reduced work ability over the year (unadjusted OR 1.05, 95%CI 0.99–1.11). There was no interaction between NSP trajectory class and time, whereby this interaction was discarded from the model.

NSP trajectory class was inversely associated with work ability (Table 2). Based on the fully adjusted model referencing low NSP (Table 2, model 3), the likelihood of a 1-unit reduction in work ability increased for moderate (OR=2.4, 95%CI 1.8–3.2), strong fluctuating (OR=8.1, 95%CI 5.9–11.2), and severe persistent NSP (OR=12.9, 95%CI 8.5–19.7). The median scores (IQR) of work ability during the year were 9.5(1.7) for low NSP, 9.0(2.0) for moderate NSP, 7.8(2.0) for strong NSP, and 7.1(2.5) for severe persistent NSP.

Additional adjustment for multisite pain showed slightly weaker estimates for moderate NSP (OR=2.2, 95%CI 1.7–2.9), strong fluctuating NSP (OR=6.4, 95%CI 4.6–9.0) and severe persistent NSP (OR=10.4, 95%CI 6.7–16.0). Further, adjustment for baseline pain intensity showed similar estimates for moderate NSP (OR=2.6, 95%CI 1.9–3.5), strong fluctuating NSP (OR=9.1, 95%CI 6.3–13.1) and severe persistent NSP (OR=15.4, 95%CI 9.3–25.5).

There was no significant interaction between NSP trajectory class and physical work load on work ability.

[Insert Table 2 about here]

### **Within-person association of NSP with sick leave and workability**

Due to the high work ability scores and low prevalence of sick leave in the classes with lower intensities of NSP, these analyses included only workers assigned to the trajectory classes strong fluctuating and severe persistent NSP (n=248).

1  
2  
3 The within-person associations of pain intensity with sick leave due to pain and work ability  
4 are shown in Table 3.  
5

6  
7 Within person fluctuations in the intensity of NSP were positively associated with sick leave  
8 (adjusted RR=1.11, 95%CI 1.02–1.21). That is, higher intensity of NSP was associated with  
9 more days of sick leave during a particular month at the individual level (Table 3 and Figure  
10 2a).  
11  
12  
13

14  
15 A similar within-person association was found between fluctuations in pain intensity and  
16 work ability (adjusted OR 1.13, 95%CI 1.04–1.21). For example, increasing intensity of NSP  
17 was associated with higher probabilities of reduced work ability (Table 3). This association is  
18 illustrated in Figure 2b as the estimated probability of reporting poor work ability ( $\leq 7$  on the  
19 0-10 scale).<sup>39</sup>  
20  
21  
22  
23  
24  
25  
26

27 [Insert Table 3 about here]  
28

29 [Insert Figure 2]  
30  
31  
32  
33  
34  
35  
36  
37  
38  
39  
40  
41  
42  
43  
44  
45  
46  
47  
48  
49  
50  
51  
52  
53  
54  
55  
56  
57  
58  
59  
60

## Discussion

In summary, this prospective study investigated the relationship between LCGA-based trajectories of NSP and the outcomes sick leave and work ability. We found that the distinguished trajectory classes of NSP were strongly associated with sick leave due to pain and poor work ability over 1 year, and that the temporal fluctuations in pain intensity predicted sick leave and work ability at the individual level.

To our knowledge, this study is unique in assessing the association between LCGA-based trajectories of NSP and important prognostic outcomes among workers. A clear strength of the study is the use of frequent prospective measures of both exposure (intensity of NSP) and outcomes (work ability and sick leave) over 1 year. The high response rate to the SMS is also a strength supporting the feasibility of this method to obtain frequent repeated measurements of pain in future studies on the prognosis of NSP.

### Trajectories of NSP, sick leave and work ability

The trajectory classes of NSP used in this study were distinguished using LCGA, resulting in six distinct trajectories of NSP.<sup>30</sup> This corroborates a study by Lövgren et al. (2014) which used Growth Mixture Modeling to identify six trajectory classes of NSP in nursing students entering working life. In contrast, the severity of NSP in the current sample of workers was much higher, perhaps due to the large proportion of blue-collar workers in this study.<sup>1</sup> The high prevalence of strong fluctuating (24%) and severe persistent NSP (9%), with mean pain intensities of 5 and 7 (scale 0-10), respectively, is noteworthy.

Trajectory class of NSP was strongly associated with the number of days on sick leave over the 1-year study period. Particularly, the fully adjusted model indicated an increased relative risk of sick leave in the trajectory class with severe persistent NSP (mean 1.5 days/month), compared with low NSP (mean 0.1 days/month). This result is in line with previous prospective studies showing a positive association between NSP intensity and sick leave.<sup>4 6</sup> This result persisted with adjustment for potential confounding by multisite pain, which was associated with NSP and sick leave in previous studies.<sup>19 44 45</sup> Thus, severe persistent NSP appears to be strongly associated with sick leave due to musculoskeletal pain, regardless of multisite pain and other personal and occupational factors.



1  
2  
3 The four trajectory classes of NSP were also associated with poor work ability over the year  
4 (Table 2). For instance, the probability of reporting reduced work ability was 13 times higher  
5 for the trajectory class with severe persistent NSP (median work ability 7.1 on the 0-10 scale),  
6 compared with low NSP (median work ability 9.5), regardless of inclusion of potential  
7 confounders in the model (Table 2, model 3). In agreement, previous studies have found that  
8 intense NSP is associated with reduced work ability in workers,<sup>3 46</sup> although none of these  
9 examined pain trajectories. Interestingly, including baseline intensity of NSP (i.e. past 3  
10 months) as an additional covariate in model 3 did not reduce the estimated association for sick  
11 leave or work ability. In fact, this adjustment resulted in even stronger estimates for work  
12 ability, which clearly indicates that the LCGA-based trajectory classes of NSP have a  
13 predictive value beyond that explained by past pain intensity assessed at a single time point.  
14  
15  
16  
17  
18  
19  
20  
21  
22

23 The observed consistent associations between the identified trajectories of NSP and the  
24 outcomes sick leave and work ability support the prognostic value of LCGA-based  
25 trajectories of NSP among workers, and suggests that such sub-populations can be of clinical  
26 and occupational relevance. Thus, this study supports using LCGA to identify distinct sub-  
27 populations of workers with different patterns of NSP. Further, the increase in relative risk of  
28 sick leave and poor work ability for severe persistent NSP points to the need for interventions  
29 and preventive strategies aiming at reducing severe persistent NSP in working populations.  
30  
31  
32  
33  
34  
35  
36  
37  
38  
39

### 40 **Effect modification by physical work load**

41 High physical work load is a known risk factor for incident NSP and has been associated with  
42 a poor prognosis.<sup>47</sup> Thus, the association for NSP trajectories with sick leave and work ability  
43 was expected to be modified by the level of self-reported physical work load at baseline.  
44 However, we could not confirm any interaction between trajectory class of NSP and physical  
45 work load neither for sick leave nor work ability. Still, it is possible that more precise  
46 technical measurements of physical work exposure would have yielded different results.  
47  
48  
49  
50  
51  
52  
53  
54

### 55 **Association of temporal fluctuations in NSP with sick leave and work ability**

56  
57 NSP is often referred to as a recurrent and fluctuating condition.<sup>11</sup> However, the temporal  
58 fluctuations in NSP have rarely been investigated in detail, and few, if any, studies have  
59  
60



1  
2  
3 examined whether fluctuations in NSP are associated with sick leave and work ability. The  
4 frequent repeated measures allowed us to assess the within-person temporal association  
5 between fluctuations in the intensity of NSP and sick leave (every fourth week) and work  
6 ability (every twelfth week). We found that the within-person fluctuations in pain intensity  
7 were significantly associated with both sick leave and work ability, which persisted in the  
8 fully adjusted model (Table 3). That is, when the individual pain score increased, the  
9 likelihood of sick leave and poor work ability also increased. Thus, not only could we address  
10 the differences between workers in temporal patterns of NSP, but also whether the temporal  
11 fluctuations in NSP at the individual level are of predictive value.  
12  
13  
14  
15  
16  
17  
18  
19  
20  
21

## 22 **Methodological discussion**

23  
24 As this study is limited to self-reported measures of pain and the outcomes sick leave and  
25 work ability, one cannot overlook the possibility of bias. Regarding self-reported sick leave,  
26 meta-analytic evidence indicates reasonably high convergent validity against organization and  
27 register-based records, although with a slight tendency for under-reporting.<sup>37</sup> Thus, there is a  
28 risk for underestimation of sick leave in this study. The question about days on sick leave the  
29 past month did not distinguish between work days and non-work days, which may have  
30 resulted in less precise estimates. Also, although both outcomes sick leave and work ability  
31 were assessed prospectively over 1 year, the NSP trajectories were determined during the  
32 same time period and thus causal inferences should be made with caution. Still, it seems most  
33 likely that pain preceded the occurrence of sick leave, rather than the reverse relationship. The  
34 compliance to text messages was very high on average (Table 1). Still, missing data increased  
35 slightly over time, which might have introduced some uncertainties in the models.  
36  
37  
38  
39  
40  
41  
42  
43  
44  
45

46 We addressed several relevant factors as confounders or effect modifiers (physical work load)  
47 of the association of pain trajectories with sick leave and work ability. However, as the causes  
48 of sick leave and poor work ability are likely multifactorial,<sup>4 19 21</sup> the focus on pain trajectories  
49 as predictors is a potential limitation because it does not inform about other potentially  
50 important prognostic factors. Also, the possibility of residual confounding by non-measured  
51 factors cannot be ruled out. For instance, we did not measure comorbidity of chronic  
52 conditions that might be associated with both NSP trajectories and the outcomes.  
53  
54  
55  
56  
57  
58  
59  
60

1  
2  
3 Since this study was conducted in a non-random sample with a predominance of blue-collar  
4 workers, it is important to verify the study findings in other working populations. The general  
5 notion of NSP as a fluctuating and reoccurring condition<sup>11</sup> is corroborated by our data, but  
6 this is rarely taken into account in observational studies on NSP. The inclusion of residual  
7 variance in the LCGA model allowed us to distinguish trajectory classes with more or less  
8 fluctuating patterns of NSP. Temporal fluctuations were more prominent in the NSP  
9 trajectories with moderate and strong pain, which may have contributed to the lower relative  
10 risk of sick leave and poor work ability compared to the trajectory class with severe persistent  
11 NSP.  
12  
13  
14  
15  
16  
17  
18

19 Since the trajectories with lower intensities of NSP, i.e., including asymptomatic, very low  
20 NSP and low recovering NSP, did not differ regarding their low occurrence of sick leave and  
21 poor work ability, we decided to merge them into a single reference category in the prediction  
22 models. Still, it is possible that these three classes differ in other prognostic outcomes.  
23  
24  
25  
26  
27  
28

## 29 **Conclusion**

30  
31 This longitudinal study shows that severe persistent NSP is associated with sick leave due to  
32 pain and reduced work ability over 1 year among workers. The high prevalence of severe  
33 persistent NSP and the increase in relative risk of sick leave and poor work ability point to the  
34 need for preventive strategies aiming at reducing severe persistent NSP among workers.  
35 Overall, our findings contribute with further understanding of the possible consequences of  
36 different time patterns and levels of NSP, which can be of general importance for researchers,  
37 practitioners and clinicians.  
38  
39  
40  
41  
42  
43  
44  
45

## 46 **Acknowledgements**

47 The study was supported by grants from the Danish government (Satspulje) and the Swedish  
48 Research Council for Health, Working Life and Welfare (Forte Dnr.2009–1761).  
49  
50  
51  
52

## 53 **Conflict of interest**

54 The authors declare none.  
55  
56  
57  
58  
59  
60

## Author contributions

DMH contributed to the statistical data analyses and drafting of the manuscript. AH and MBJ contributed to the conception, design, data collection and funding of the full DPhacto study. All authors (DMH, AH, SDL, MBJ, and CDNR) contributed to the conception of this study, discussed the results and commented on the manuscript.

## Data sharing statement

Additional data can be accessed on request by email ([aho@arbejdsmiljoforskning.dk](mailto:aho@arbejdsmiljoforskning.dk)).

## References

- 1 Côté P, van der Velde G, Cassidy JD et al. The Burden and Determinants of Neck Pain in Workers: Results of the Bone and Joint Decade 2000-2010 Task Force on Neck Pain and Its Associated Disorders. *J Manipulative Physiol Ther* 2009;32:S70-S86.
- 2 Vos T, Barber RM, Bell B et al. Global, regional, and national incidence, prevalence, and years lived with disability for 301 acute and chronic diseases and injuries in 188 countries, 1990-2013: a systematic analysis for the Global Burden of Disease Study 2013. *The Lancet* 2015;386:743-800.
- 3 Rashid M, Kristofferzon M-L, Heiden M, Nilsson A. Factors related to work ability and well-being among women on sick leave due to long-term pain in the neck/shoulders and/or back: a cross-sectional study. *BMC Public Health* 2018;18:672.
- 4 Holtermann A, Hansen JV, Burr H, Sogaard K. Prognostic factors for long-term sickness absence among employees with neck-shoulder and low-back pain. *Scand J Work Environ Health* 2010;36:34-41.
- 5 Burdorf A, Naaktgeboren B, Post W. Prognostic factors for musculoskeletal sickness absence and return to work among welders and metal workers. *Occup Environ Med* 1998;55:490-5.
- 6 Andersen LL, Clausen T, Burr H, Holtermann A. Threshold of Musculoskeletal Pain Intensity for Increased Risk of Long-Term Sickness Absence among Female Healthcare Workers in Eldercare. *PLoS One* 2012;7:e41287.
- 7 Borghouts JAJ, Koes BW, Vondeling H, Bouter LM. Cost-of-illness of neck pain in The Netherlands in 1996. *Pain* 1999;80:629-636.
- 8 Woodhouse A, Pape K, Romundstad PR, Vasseljen O. Health care contact following a new incident neck or low back pain episode in the general population; the HUNT study. *BMC Health Serv Res* 2016;16:81.
- 9 Hansson EK, Hansson TH. The costs for persons sick-listed more than one month because of low back or neck problems. A two-year prospective study of Swedish patients. *Eur Spine J* 2005;14:337-345.
- 10 Fejer R, Jordan A, Hartvigsen J. Categorising the severity of neck pain: Establishment of cut-points for use in clinical and epidemiological research. *Pain* 2005;119:176-182.
- 11 Carroll L, Hogg-Johnson S, Côté P et al. Course and Prognostic Factors for Neck Pain in Workers. *Eur Spine J* 2008;17:93-100.

- 1  
2  
3 12 Bruls VEJ, Bastiaenen CHG, de Bie RA. Prognostic factors of complaints of arm,  
4 neck, and/or shoulder: a systematic review of prospective cohort studies. *Pain*  
5 2015;156:765-788.  
6  
7  
8 13 Côté P, Cassidy JD, Carroll LJ, Kristman V. The annual incidence and course of neck  
9 pain in the general population: a population-based cohort study. *Pain* 2004;112:267-  
10 273.  
11  
12  
13 14 Lövgren M, Gustavsson P, Melin B, Rudman A. Neck/shoulder and back pain in new  
14 graduate nurses: A growth mixture modeling analysis. *Int J Nurs Stud* 2014;51:625-  
15 639.  
16  
17  
18 15 Kongsted A, Kent P, Axen I, Downie AS, Dunn KM. What have we learned from ten  
19 years of trajectory research in low back pain? *BMC Musculoskelet Disord*  
20 2016;17:220.  
21  
22  
23 16 Axén I, Leboeuf-Yde C. Trajectories of low back pain. *Best Practice & Research*  
24 *Clinical Rheumatology* 2013;27:601-612.  
25  
26  
27 17 Dunn KM, Campbell P, Jordan KP. Long-term trajectories of back pain: cohort study  
28 with 7-year follow-up. *BMJ Open* 2013;3:e003838.  
29  
30  
31 18 de Vries H, Reneman M, Groothoff J, Geertzen J, Brouwer S. Workers Who Stay at  
32 Work Despite Chronic Nonspecific Musculoskeletal Pain: Do They Differ from  
33 Workers with Sick Leave? *Journal of Occupational Rehabilitation* 2012;22:489-502.  
34  
35  
36 19 Feleus A, Miedema HS, Bierma-Zeinstra SMA, Hoekstra T, Koes BW, Burdorf A.  
37 Sick leave in workers with arm, neck and/or shoulder complaints; defining occurrence  
38 and discriminative trajectories over a 2-year time period. *Occup Environ Med* 2016.  
39  
40  
41 20 Ilmarinen J, von Bonsdorff M. Work Ability. In: Whitbourne (ed.) *The Encyclopedia*  
42 *of Adulthood and Aging* 2005.  
43  
44  
45 21 van den Berg TIJ, Elders LAM, de Zwart BCH, Burdorf A. The effects of work-  
46 related and individual factors on the Work Ability Index: a systematic review. *Occup*  
47 *Environ Med* 2009;66:211.  
48  
49  
50 22 Ahlstrom L, Grimby-Ekman A, Hagberg M, Dellve L. The work ability index and  
51 single-item question: associations with sick leave, symptoms, and health--a  
52 prospective study of women on long-term sick leave. *Scand J Work Environ Health*  
53 2010;36:404-12.  
54  
55  
56 23 Lötters F, Burdorf A. Prognostic Factors for Duration of Sickness Absence due to  
57 Musculoskeletal Disorders. *Clin J Pain* 2006;22:212-221.  
58  
59  
60

- 1  
2  
3 24 Karels CH, Bierma-Zeinstra SM, Verhagen AP, Koes BW, Burdorf A. Sickness  
4 absence in patients with arm, neck and shoulder complaints presenting in physical  
5 therapy practice: 6 months follow-up. *Man Ther* 2010;15:476-481.  
6  
7  
8 25 Ariens GA, Bongers PM, Hoogendoorn WE, van der Wal G, van Mechelen W. High  
9 physical and psychosocial load at work and sickness absence due to neck pain. *Scand  
10 J Work Environ Health* 2002;28:222-31.  
11  
12  
13 26 Walton DM, Carroll LJ, Kasch H et al. An Overview of Systematic Reviews on  
14 Prognostic Factors in Neck Pain: Results from the International Collaboration on Neck  
15 Pain (ICON) Project. *Open Orthop J* 2013;7:494-505.  
16  
17  
18 27 Axén I, Bergström G, Bodin L. Using few and scattered time points for analysis of a  
19 variable course of pain can be misleading: an example using weekly text message  
20 data. *Spine J* 2014;14:1454-1459.  
21  
22  
23 28 Miranda H, Gold JE, Gore R, Punnett L. Recall of prior musculoskeletal pain. *Scand J  
24 Work Environ Health* 2006;32:294-9.  
25  
26  
27 29 Jung T, Wickrama KAS. An Introduction to Latent Class Growth Analysis and  
28 Growth Mixture Modeling. *Soc Personal Psychol Compass* 2008;2:302-317.  
29  
30  
31 30 Hallman DM, Nørregaard Rasmussen CD, Birk Jørgensen M, Holtermann A. Time  
32 course of neck-shoulder pain in workers: A longitudinal latent class growth analysis.  
33 *Scand J Work Environ Health* 2018;44:47-57.  
34  
35  
36 31 Jørgensen M, Korshøj M, Lagersted-Olsen J et al. Physical activities at work and risk  
37 of musculoskeletal pain and its consequences: protocol for a study with objective field  
38 measures among blue-collar workers. *BMC Musculoskelet Disord* 2013;14:1-9.  
39  
40  
41 32 Hallman DM, Birk Jørgensen M, Holtermann A. On the health paradox of  
42 occupational and leisure-time physical activity using objective measurements: Effects  
43 on autonomic imbalance. *PLoS One* 2017;12:e0177042.  
44  
45  
46 33 Hallman DM, Gupta N, Heiden M et al. Is prolonged sitting at work associated with  
47 the time course of neck-shoulder pain? A prospective study in Danish blue-collar  
48 workers. *BMJ Open* 2016;6:e012689.  
49  
50  
51 34 Ferreira-Valente MA, Pais-Ribeiro JL, Jensen MP. Validity of four pain intensity  
52 rating scales. *Pain* 2011;152:2399-2404.  
53  
54  
55 35 Dworkin RH, Turk DC, Farrar JT et al. Core outcome measures for chronic pain  
56 clinical trials: IMMPACT recommendations. *Pain* 2005;113:9-19.  
57  
58  
59 36 Keefe FJ, Linton SJ, Lefebvre JC. The Outcome Evaluation Questionnaire:  
60 Description and Initial Findings. *Scand J Behaviour Ther* 1992;21:19-33.

- 1  
2  
3 37 Johns G, Miraglia M. The reliability, validity, and accuracy of self-reported  
4 absenteeism from work: A meta-analysis. *J Occup Health Psychol* 2015;20:1-14.  
5  
6 38 Tuomi K, Ilmarinen J, Jahkola A, Katajarinne L, Tulkki A. *Work ability index*.  
7 Helsinki: Finnish institute of occupational health, 1998.  
8  
9 39 Neupane S, Miranda H, Virtanen P, Siukola A, Nygard CH. Multi-site pain and work  
10 ability among an industrial population. *Occup Med (Lond)* 2011;61:563-9.  
11  
12 40 Borg G. Borg's perceived exertion and pain scales. *Champaign, IL: Human Kinetics*  
13 1998.  
14  
15 41 Kuorinka I, Jonsson B, Kilbom A et al. Standardised Nordic questionnaires for the  
16 analysis of musculoskeletal symptoms. *Appl Ergon* 1987;18:233-237.  
17  
18 42 Neupane S, Leino-Arjas P, Nygård C-H, Oakman J, Virtanen P. Developmental  
19 pathways of multisite musculoskeletal pain: what is the influence of physical and  
20 psychosocial working conditions? *Occup Environ Med* 2017;74:468-475.  
21  
22 43 Hoffman L, Stawski RS. Persons as Contexts: Evaluating Between-Person and  
23 Within-Person Effects in Longitudinal Analysis. *Research in Human Development*  
24 2009;6:97-120.  
25  
26 44 Sarquis LMM, Coggon D, Ntani G et al. Classification of neck/shoulder pain in  
27 epidemiological research: a comparison of personal and occupational characteristics,  
28 disability, and prognosis among 12,195 workers from 18 countries. *Pain*  
29 2016;157:1028-1036.  
30  
31 45 Haukka E, Kaila-Kangas L, Ojajärvi A et al. Pain in multiple sites and sickness  
32 absence trajectories: A prospective study among Finns. *Pain* 2013;154:306-312.  
33  
34 46 Bugajska J, Sagan A. Chronic musculoskeletal disorders as risk factors for reduced  
35 work ability in younger and ageing workers. *Int J Occup Saf Ergon* 2014;20:607-15.  
36  
37 47 Mayer J, Kraus T, Ochsmann E. Longitudinal evidence for the association between  
38 work-related physical exposures and neck and/or shoulder complaints: a systematic  
39 review. *Int Arch Occup Environ Health* 2012;85:587-603.  
40  
41  
42  
43  
44  
45  
46  
47  
48  
49  
50  
51  
52  
53  
54  
55  
56  
57  
58  
59  
60



## Tables

**Table 1** Descriptive characteristics of the study population (n=748)

|                                                        | N        | Median | IQR | Mean | SD   |
|--------------------------------------------------------|----------|--------|-----|------|------|
| Age (years)                                            | 748      |        |     | 44.8 | 9.6  |
| Men N (%)                                              | 411 (55) |        |     |      |      |
| BMI (kg×m <sup>2</sup> )                               | 732      |        |     | 27.3 | 4.8  |
| Seniority (years)                                      | 722      |        |     | 13.5 | 10.3 |
| Administration workers N (%)                           | 128 (17) |        |     |      |      |
| Blue-collar workers N (%)                              | 620 (83) |        |     |      |      |
| Cleaning                                               | 115 (15) |        |     |      |      |
| Manufacturing                                          | 448 (60) |        |     |      |      |
| Transportation                                         | 57 (8)   |        |     |      |      |
| Physical work load at baseline (scale 1-10)            | 723      |        |     | 5.3  | 2.4  |
| Sick leave days                                        |          |        |     |      |      |
| Baseline (days/month)                                  | 741      | 0.0    | 0.0 | 0.3  | 1.9  |
| Last follow-up (days/month)                            | 655      | 0.0    | 0.0 | 0.4  | 2.5  |
| Total days (over all time points)                      | 746      | 0.0    | 3.0 | 5.8  | 20.9 |
| Work ability (scale 0-10)                              |          |        |     |      |      |
| Baseline                                               | 646      | 9.0    | 2.0 | 8.5  | 2.0  |
| Last follow-up                                         | 671      | 9.0    | 2.0 | 8.2  | 2.4  |
| Mean work ability (over all time points)               | 732      | 8.8    | 2.5 | 8.3  | 1.7  |
| NSP intensity (scale 0-10)                             |          |        |     |      |      |
| Baseline                                               | 748      | 2.0    | 5.0 | 3.0  | 2.7  |
| Last follow-up                                         | 652      | 2.0    | 4.0 | 2.4  | 2.7  |
| Mean NSP intensity (over all time points)              | 748      | 2.0    | 3.6 | 2.6  | 2.3  |
| Number of pain regions at baseline (count)             | 745      | 1.0    | 3.0 | 1.7  | 1.5  |
| Compliance to text messages (missing responses, count) |          |        |     |      |      |
| NSP intensity                                          | 748      | 0.0    | 1.0 | 1.2  | 2.7  |
| Sick leave                                             | 746      | 0.0    | 1.0 | 1.2  | 2.6  |
| Work ability                                           | 732      | 0.0    | 1.0 | 0.4  | 0.7  |

Abbreviations: BMI, body mass index; NSP, neck-shoulder pain; IQR, inter quartile range.



**Table 2. Association** of neck-shoulder pain (NSP) trajectory class with sick leave (days/month) and work ability (ordinal scale 0-10) over 1 year, referencing low NSP.

| GEE models (classes) | N   | Sick leave |       |             |             | Work ability |       |             |             |
|----------------------|-----|------------|-------|-------------|-------------|--------------|-------|-------------|-------------|
|                      |     | p-value    | RR    | 95%CI Lower | 95%CI Upper | p-value      | OR    | 95%CI Lower | 95%CI Upper |
| <b>Model 1</b>       |     |            |       |             |             |              |       |             |             |
| Low NSP              | 292 |            | 1.00  |             |             |              | 1.00  |             |             |
| Moderate NSP         | 208 | <0.001     | 3.28  | 1.89        | 5.68        | <0.001       | 2.45  | 1.87        | 3.21        |
| Strong NSP           | 178 | <0.001     | 8.98  | 4.78        | 16.89       | <0.001       | 8.64  | 6.38        | 11.69       |
| Severe NSP           | 70  | <0.001     | 17.64 | 9.36        | 33.23       | <0.001       | 15.07 | 9.94        | 22.85       |
| <b>Model 2</b>       |     |            |       |             |             |              |       |             |             |
| Low NSP              | 286 |            | 1.00  |             |             |              | 1.00  |             |             |
| Moderate NSP         | 204 | <0.001     | 3.25  | 1.87        | 5.64        | <0.001       | 2.40  | 1.83        | 3.16        |
| Strong NSP           | 174 | <0.001     | 8.61  | 4.54        | 16.33       | <0.001       | 9.03  | 6.62        | 12.31       |
| Severe NSP           | 68  | <0.001     | 16.00 | 8.17        | 31.34       | <0.001       | 14.77 | 9.63        | 22.66       |
| <b>Model 3</b>       |     |            |       |             |             |              |       |             |             |
| Low NSP              | 277 |            | 1.00  |             |             |              | 1.00  |             |             |
| Moderate NSP         | 199 | <0.001     | 3.11  | 1.75        | 5.52        | <0.001       | 2.43  | 1.84        | 3.20        |
| Strong NSP           | 165 | <0.001     | 7.58  | 3.91        | 14.71       | <0.001       | 8.12  | 5.91        | 11.16       |
| Severe NSP           | 66  | <0.001     | 13.83 | 6.72        | 28.49       | <0.001       | 12.93 | 8.50        | 19.67       |

Relative risk (RR) estimates, indicating the relative increase in the number of days on sick leave per month, were obtained using Generalized Estimation Equation (GEE) with a Poisson distribution for days on sick-leave (measured at 4 week intervals). Odds ratios (OR), indicating the likelihood of a 1-unit reduction in work ability, were obtained using GEE with a multinomial distribution for work ability (measured at 12 week intervals).

Model 1: Unadjusted.

Model 2: Adjusted for age, gender and body mass index.

Model 3: Additionally adjusted for occupational sector (four categories, referencing administration) and physical work load.

**Table 3.** Within-person effect of temporal fluctuations in neck-shoulder pain intensity (scale 0-10) on sick leave (days/month) and work ability (scale 0-10) over 1 year

| GEE models | Sick leave |         |      |        |       | Work ability |      |        |       |  |
|------------|------------|---------|------|--------|-------|--------------|------|--------|-------|--|
|            | N          | p-value | RR   | 95% CI |       | p-value      | OR   | 95% CI |       |  |
|            |            |         |      | Lower  | Upper |              |      | Lower  | Upper |  |
| Model 1    | 248        | 0.008   | 1.12 | 1.03   | 1.21  | 0.005        | 1.11 | 1.03   | 1.19  |  |
| Model 2    | 242        | 0.008   | 1.12 | 1.03   | 1.21  | 0.009        | 1.11 | 1.03   | 1.19  |  |
| Model 3    | 231        | 0.011   | 1.11 | 1.02   | 1.21  | 0.002        | 1.13 | 1.04   | 1.21  |  |

Relative risk (RR) estimates, indicating the relative increase in the number of days on sick leave per month, were obtained using Generalized Estimation Equation (GEE) with a Poisson distribution for days on sick-leave (measured at 4 week intervals). Odds ratios (OR), indicating the likelihood of a 1-unit reduction in work ability, were obtained using GEE with a multinomial distribution for work ability (measured at 12 week intervals). Estimates indicate the within-person effect of change in pain intensity on change in sick leave and work ability per month.

Model 1: adjusted for the person mean pain intensity across time points.

Model 2: additionally adjusted for age, gender and BMI.

Model 3: additionally adjusted for occupational sector and physical work load.

## Figure legends

**Figure 1.** Mean 1-year trajectories of days on sick leave obtained in the fully adjusted model in each trajectory class of neck-shoulder pain (NSP). The x-axis represents the 14 pain ratings over 1 year. The y-axis represents the mean predicted number of days on sick leave per month.

**Figure 2.** Association between temporal fluctuations in neck-shoulder pain intensity (NSP) and the outcomes sick leave and work ability. The x-axis represents the difference in pain intensity scores from the person mean pain intensity across time points. The y-axis represents the predicted number of days on sick leave per month (Fig. 2a) and the predicted cumulative probability of poor work ability (Fig. 2b), as defined by the cut-point  $\leq 7$  (scale 0-10).<sup>39</sup>

## Supplemental Figures

**Supplemental Figure A.** Mean predicted intensity of neck-shoulder pain (NSP) over 1 year in the four trajectory classes of NSP obtained using Latent class growth analysis.



Figure 1.

Figure 1. Mean 1-year trajectories of days on sick leave obtained in the fully adjusted model in each trajectory class of neck-shoulder pain (NSP). The x-axis represents the 14 pain ratings over 1 year. The y-axis represents the mean predicted number of days on sick leave per month.

215x279mm (300 x 300 DPI)



Figure 2

Figure 2. Association between temporal fluctuations in neck-shoulder pain (NSP) and the outcomes sick leave and work ability. The x-axis represents the difference in pain intensity scores from the person mean pain intensity across time points. The y-axis represents the predicted number of days on sick leave per month (Fig. 2a) and the predicted cumulative probability of poor work ability (Fig. 2b), as defined by the cut-point  $\leq 7$  (scale 0-10).

350x199mm (300 x 300 DPI)

1  
2  
3  
4  
5  
6  
7  
8  
9  
10  
11  
12  
13  
14  
15  
16  
17  
18  
19  
20  
21  
22  
23  
24  
25  
26  
27  
28  
29  
30  
31  
32  
33  
34  
35  
36  
37  
38  
39  
40  
41  
42  
43  
44  
45  
46  
47  
48  
49  
50  
51  
52  
53  
54  
55  
56  
57  
58  
59  
60



Supplemental Figure A.

Supplemental Figure A. Mean predicted intensity of neck-shoulder pain (NSP) over 1 year in the four trajectory classes of NSP obtained using Latent class growth analysis.

## STROBE Statement—checklist of items that should be included in reports of observational studies

|                              | Item No | Recommendation                                                                                                                                                                                                                                                                                                                                                                                                                                                         | Check yes/no                                              |
|------------------------------|---------|------------------------------------------------------------------------------------------------------------------------------------------------------------------------------------------------------------------------------------------------------------------------------------------------------------------------------------------------------------------------------------------------------------------------------------------------------------------------|-----------------------------------------------------------|
| <b>Title and abstract</b>    | 1       | (a) Indicate the study's design with a commonly used term in the title or the abstract                                                                                                                                                                                                                                                                                                                                                                                 | yes                                                       |
|                              |         | (b) Provide in the abstract an informative and balanced summary of what was done and what was found                                                                                                                                                                                                                                                                                                                                                                    | yes                                                       |
| <b>Introduction</b>          |         |                                                                                                                                                                                                                                                                                                                                                                                                                                                                        |                                                           |
| Background/rationale         | 2       | Explain the scientific background and rationale for the investigation being reported                                                                                                                                                                                                                                                                                                                                                                                   | yes, p4-5                                                 |
| Objectives                   | 3       | State specific objectives, including any prespecified hypotheses                                                                                                                                                                                                                                                                                                                                                                                                       | yes, p5                                                   |
| <b>Methods</b>               |         |                                                                                                                                                                                                                                                                                                                                                                                                                                                                        |                                                           |
| Study design                 | 4       | Present key elements of study design early in the paper                                                                                                                                                                                                                                                                                                                                                                                                                | yes, p5                                                   |
| Setting                      | 5       | Describe the setting, locations, and relevant dates, including periods of recruitment, exposure, follow-up, and data collection                                                                                                                                                                                                                                                                                                                                        | yes, p5                                                   |
| Participants                 | 6       | (a) <i>Cohort study</i> —Give the eligibility criteria, and the sources and methods of selection of participants. Describe methods of follow-up<br><i>Case-control study</i> —Give the eligibility criteria, and the sources and methods of case ascertainment and control selection. Give the rationale for the choice of cases and controls<br><i>Cross-sectional study</i> —Give the eligibility criteria, and the sources and methods of selection of participants | a) yes, p5-6                                              |
|                              |         | (b) <i>Cohort study</i> —For matched studies, give matching criteria and number of exposed and unexposed<br><i>Case-control study</i> —For matched studies, give matching criteria and the number of controls per case                                                                                                                                                                                                                                                 |                                                           |
| Variables                    | 7       | Clearly define all outcomes, exposures, predictors, potential confounders, and effect modifiers. Give diagnostic criteria, if applicable                                                                                                                                                                                                                                                                                                                               | yes, p6-8                                                 |
| Data sources/<br>measurement | 8*      | For each variable of interest, give sources of data and details of methods of assessment (measurement). Describe comparability of assessment methods if there is more than one group                                                                                                                                                                                                                                                                                   | yes, p6-8                                                 |
| Bias                         | 9       | Describe any efforts to address potential sources of bias                                                                                                                                                                                                                                                                                                                                                                                                              | yes, p7-8 and 9<br>(confounders and statistical analyses) |
| Study size                   | 10      | Explain how the study size was arrived at                                                                                                                                                                                                                                                                                                                                                                                                                              | yes, p6                                                   |
| Quantitative variables       | 11      | Explain how quantitative variables were handled in the analyses. If applicable, describe which groupings were chosen and why                                                                                                                                                                                                                                                                                                                                           | yes, p8-9                                                 |
| Statistical methods          | 12      | (a) Describe all statistical methods, including those used to control for confounding                                                                                                                                                                                                                                                                                                                                                                                  | yes p8-9                                                  |

|    |                                                                  |                  |
|----|------------------------------------------------------------------|------------------|
| 1  |                                                                  |                  |
| 2  | (b) Describe any methods used to examine subgroups and           | yes, p8-9        |
| 3  | interactions                                                     |                  |
| 4  | (c) Explain how missing data were addressed                      | yes, p8          |
| 5  | (d) <i>Cohort study</i> —If applicable, explain how loss to      | yes, p8; page 11 |
| 6  | follow-up was addressed                                          |                  |
| 7  | <i>Case-control study</i> —If applicable, explain how matching   |                  |
| 8  | of cases and controls was addressed                              |                  |
| 9  | <i>Cross-sectional study</i> —If applicable, describe analytical |                  |
| 10 | methods taking account of sampling strategy                      |                  |
| 11 |                                                                  |                  |
| 12 | (e) Describe any sensitivity analyses                            |                  |
| 13 |                                                                  |                  |

Continued on next page

For peer review only



| <b>Results</b>           |     |                                                                                                                                                                                                                                                                                                                                                                                                               | <b>Yes/no</b>                                             |
|--------------------------|-----|---------------------------------------------------------------------------------------------------------------------------------------------------------------------------------------------------------------------------------------------------------------------------------------------------------------------------------------------------------------------------------------------------------------|-----------------------------------------------------------|
| Participants             | 13* | (a) Report numbers of individuals at each stage of study—eg numbers potentially eligible, examined for eligibility, confirmed eligible, included in the study, completing follow-up, and analysed<br>(b) Give reasons for non-participation at each stage<br>(c) Consider use of a flow diagram                                                                                                               | Yes, p6 (flow) p 11 (compliance), and results tables 1-3. |
| Descriptive data         | 14* | (a) Give characteristics of study participants (eg demographic, clinical, social) and information on exposures and potential confounders<br>(b) Indicate number of participants with missing data for each variable of interest<br>(c) <i>Cohort study</i> —Summarise follow-up time (eg, average and total amount)                                                                                           | Yes, p11<br>Yes, p11 (table 1)                            |
| Outcome data             | 15* | <i>Cohort study</i> —Report numbers of outcome events or summary measures over time<br><i>Case-control study</i> —Report numbers in each exposure category, or summary measures of exposure<br><i>Cross-sectional study</i> —Report numbers of outcome events or summary measures                                                                                                                             | yes, p 11 (table 1)                                       |
| Main results             | 16  | (a) Give unadjusted estimates and, if applicable, confounder-adjusted estimates and their precision (eg, 95% confidence interval). Make clear which confounders were adjusted for and why they were included<br>(b) Report category boundaries when continuous variables were categorized<br>(c) If relevant, consider translating estimates of relative risk into absolute risk for a meaningful time period | Yes, tables 2-3<br>n/a                                    |
| Other analyses           | 17  | Report other analyses done—eg analyses of subgroups and interactions, and sensitivity analyses                                                                                                                                                                                                                                                                                                                | statistical methods and results                           |
| <b>Discussion</b>        |     |                                                                                                                                                                                                                                                                                                                                                                                                               |                                                           |
| Key results              | 18  | Summarise key results with reference to study objectives                                                                                                                                                                                                                                                                                                                                                      | yes, p15                                                  |
| Limitations              | 19  | Discuss limitations of the study, taking into account sources of potential bias or imprecision. Discuss both direction and magnitude of any potential bias                                                                                                                                                                                                                                                    | yes, p17                                                  |
| Interpretation           | 20  | Give a cautious overall interpretation of results considering objectives, limitations, multiplicity of analyses, results from similar studies, and other relevant evidence                                                                                                                                                                                                                                    | yes, p18                                                  |
| Generalisability         | 21  | Discuss the generalisability (external validity) of the study results                                                                                                                                                                                                                                                                                                                                         | yes, p17 (last paragraph)                                 |
| <b>Other information</b> |     |                                                                                                                                                                                                                                                                                                                                                                                                               |                                                           |
| Funding                  | 22  | Give the source of funding and the role of the funders for the present study and, if applicable, for the original study on which the present article is based                                                                                                                                                                                                                                                 | yes, p18                                                  |

\*Give information separately for cases and controls in case-control studies and, if applicable, for exposed and unexposed groups in cohort and cross-sectional studies.

1  
2 **Note:** An Explanation and Elaboration article discusses each checklist item and gives methodological background and  
3 published examples of transparent reporting. The STROBE checklist is best used in conjunction with this article (freely  
4 available on the Web sites of PLoS Medicine at <http://www.plosmedicine.org/>, Annals of Internal Medicine at  
5 <http://www.annals.org/>, and Epidemiology at <http://www.epidem.com/>). Information on the STROBE Initiative is  
6 available at [www.strobe-statement.org](http://www.strobe-statement.org).  
7  
8  
9  
10  
11  
12  
13  
14  
15  
16  
17  
18  
19  
20  
21  
22  
23  
24  
25  
26  
27  
28  
29  
30  
31  
32  
33  
34  
35  
36  
37  
38  
39  
40  
41  
42  
43  
44  
45  
46  
47  
48  
49  
50  
51  
52  
53  
54  
55  
56  
57  
58  
59  
60

# BMJ Open

## Are trajectories of neck–shoulder pain associated with sick leave and work ability in workers? A one-year prospective study

|                                 |                                                                                                                                                                                                                                                                                                                                                                                                               |
|---------------------------------|---------------------------------------------------------------------------------------------------------------------------------------------------------------------------------------------------------------------------------------------------------------------------------------------------------------------------------------------------------------------------------------------------------------|
| Journal:                        | <i>BMJ Open</i>                                                                                                                                                                                                                                                                                                                                                                                               |
| Manuscript ID                   | bmjopen-2018-022006.R4                                                                                                                                                                                                                                                                                                                                                                                        |
| Article Type:                   | Research                                                                                                                                                                                                                                                                                                                                                                                                      |
| Date Submitted by the Author:   | 12-Feb-2019                                                                                                                                                                                                                                                                                                                                                                                                   |
| Complete List of Authors:       | Hallman, David; University of Gävle, Centre for Musculoskeletal Research<br>Holtermann, Andreas; National Research Centre for the Working Environment,<br>Dencker-Larsen, Sofie; National Research Centre for the Working Environment<br>Birk Jørgensen, Marie; National Research Centre for the Working Environment<br>Nørregaard Rasmussen, Charlotte; National Research Centre for the Working Environment |
| <b>Primary Subject Heading</b>: | Occupational and environmental medicine                                                                                                                                                                                                                                                                                                                                                                       |
| Secondary Subject Heading:      | Public health                                                                                                                                                                                                                                                                                                                                                                                                 |
| Keywords:                       | Chronic pain, LCGA, Neck pain, Occupational, Pain trajectories                                                                                                                                                                                                                                                                                                                                                |
|                                 |                                                                                                                                                                                                                                                                                                                                                                                                               |

SCHOLARONE™  
Manuscripts

# **Title: Are trajectories of neck–shoulder pain associated with sick leave and work ability in workers? A one-year prospective study**

Authors: David M Hallman<sup>1\*</sup>, Andreas Holtermann<sup>2,3</sup>, Sofie Dencker-Larsen<sup>2</sup>, Marie Birk Jørgensen<sup>2</sup>, Charlotte Diana Nørregaard Rasmussen<sup>2</sup>

## Affiliations:

<sup>1</sup>Centre for Musculoskeletal Research, Department of Occupational and Public Health Sciences, University of Gävle, Gävle, Sweden

<sup>2</sup>National Research Centre for the Working Environment, Copenhagen, Denmark

<sup>3</sup>Department of Sports Science and Clinical Biomechanics, University of Southern Denmark, Odense, Denmark

## \*Corresponding author:

David M Hallman, University of Gävle, Kungsbäcksvägen 47, 80176 Gävle, Sweden; Email: [david.hallman@hig.se](mailto:david.hallman@hig.se); Phone: +46 736266413

Funding: The study was supported by grants from the Danish government (Satspulje) and the Swedish Research Council for Health, Working Life and Welfare (Forte Dnr.2009–1761).

Conflict of interest: None to declare.

## Author contributions:

DMH contributed to the statistical data analyses and drafting of the manuscript. AH and MBJ contributed to the conception, design, data collection and funding of the full DPHACTO study. All authors (DMH, AH, SDL, MBJ, and CDNR) contributed to the conception of this study, discussed the results and commented on the manuscript.

## Data sharing statement:

Additional data can be accessed on request by email ([aho@arbejdsmiljoforskning.dk](mailto:aho@arbejdsmiljoforskning.dk)).

The manuscript contains about 4300 words, 3 tables, 2 figures, and 1 Supplemental figure.

## Abstract

### Objectives

The study aimed to determine the extent to which latent trajectories of neck-shoulder pain (NSP) are associated with self-reported sick leave and work ability based on frequent repeated measures over 1 year in an occupational population.

### Methods

This longitudinal study included 748 Danish workers (blue-collar, n=620; white collar, n=128). A questionnaire was administered to collect data on personal and occupational factors at baseline. Text messages were used for repeated measurements of NSP intensity (scale 0-10) over 1 year (14 waves in total). Simultaneously, self-reported sick leave (days/month) due to pain was assessed at four week intervals, while work ability (scale 0-10) was assessed using a single item (work ability index) at 12 week intervals over the year. Trajectories of NSP, distinguished by latent class growth analysis (LCGA), were used as predictors of sick leave and work ability in generalized estimation equations with multiple adjustments.

### Results

Sick leave increased and work ability decreased across all NSP trajectory classes (low, moderate, strong fluctuating, and severe persistent pain intensity). In the adjusted model, the estimated number of days on sick leave was 1.5 days/month for severe persistent NSP compared with 0.1 days/month for low NSP (RR=13.8, 95%CI 6.7–28.5). Similarly, work ability decreased markedly for severe persistent NSP (OR=12.9, 95%CI 8.5–19.7; median 7.1) compared with low NSP (median 9.5).

### Conclusion

Severe persistent NSP was associated with sick leave and poor work ability over 1 year among workers. Preventive strategies aiming at reducing severe persistent NSP among working populations are needed.

**Keywords:** Chronic pain; LCGA; Neck pain; Occupational; Pain trajectories

### Strengths and limitations of this study

- This is the first study investigating the association of longitudinal trajectories of neck-shoulder pain with sick leave and work ability.
- Repeated monthly assessments over 1 year allowed detailed analyses of the time course of pain intensity, sick leave and work ability.
- High response rates were obtained during each month of follow-up.
- Self-reported measurements of exposure and outcome during the same time-period are potential limitations.

For peer review only

## Introduction

Neck-shoulder pain (NSP) is a common condition, with annual prevalence rates between 27% and 48% in different working populations.<sup>1</sup> NSP is one of the leading causes of years lived with disability worldwide,<sup>2</sup> and is associated with reduced work ability<sup>3</sup> and high sick leave rates.<sup>4,5</sup> In workers with NSP, 20% had at least one spell of sick leave in one year.<sup>4</sup> Sick leave risks are higher in workers with more severe NSP intensity.<sup>6</sup> The economic burden of NSP on organizations and society is considerable.<sup>7-9</sup> The estimated total cost of neck pain in The Netherlands in 1996 was 686 million US dollars,<sup>7</sup> and the estimated total cost of both neck and back pain in Sweden in 2001 was 1% of the gross national product (GNP).<sup>9</sup>

NSP is considered a heterogeneous condition ranging from very mild symptoms to severe chronic pain<sup>10</sup> with a substantial individual variability in progression over time.<sup>11-13</sup> This heterogeneity may, however, comprise homogenous sub-populations with distinct patterns of pain, unique risk factors and different underlying pathophysiology.<sup>14</sup> Revealing such sub-populations is likely important for early identification, establishing risk factors, and improving prevention and treatment.<sup>15</sup> However, most existing studies have been conducted on patients with low back pain, e.g.,<sup>15-17</sup> while studies identifying and describing the patterns of NSP in working populations with a wide range of pain severities are sparse. Also, there is a lack of research on the predictive value of NSP sub-populations; which is crucial for understanding the extent to which NSP sub-populations are of clinical and occupational relevance regarding intervention and treatment. Thus, it is important for research and occupational and clinical practice to distinguish sub-populations of workers with different trajectories of NSP (e.g. severity, temporal variability and time course) while assessing their predictive value against core prognostic outcomes, such as sick leave and work ability.<sup>4, 18, 19</sup>

Work ability, as defined as the balance between human resources and work demands,<sup>20</sup> is determined by multiple factors.<sup>21</sup> The perception of poor work ability is associated with sick leave and early retirement.<sup>22</sup> Sick leave due to pain is likely multifactorial, and several personal and work related (physical and psychosocial) factors have been identified as potential determinants of increased risks.<sup>4, 19, 23, 24</sup> High physical workload is associated with poor work ability and occurrence of sick leave due to pain,<sup>4, 25</sup> and may hamper return to work.<sup>23</sup> Thus, the level of physical workload is a potential moderator of the relationship of NSP trajectories with work ability and sick leave.

1  
2  
3  
4  
5 Most previous studies on the prognosis of NSP have relied only on few measurements in time  
6 interspersed by long intervals, e.g. years.<sup>11 26</sup> Such studies are not designed to capture the  
7 detailed time course (trajectory) or temporal fluctuations in NSP (e.g. between weeks or  
8 months). In contrast, frequent repeated measurements of pain facilitate accurate and precise  
9 identification of individual pain trajectories<sup>27</sup> and minimize recall bias.<sup>28</sup>

10  
11  
12  
13  
14  
15 Latent class growth analysis (LCGA) is a common statistical approach for identifying  
16 homogenous sub-populations (latent classes) based on individual growth parameters (i.e.  
17 intercept, slope and residual variance) in repeated measures data.<sup>29</sup> We have previously used  
18 LCGA to distinguish trajectory classes of NSP among the current population of workers based  
19 on frequent repeated measurements of NSP over 1 year.<sup>30</sup> We identified six distinct  
20 trajectories of NSP ranging from “asymptomatic” (prevalence 11%) to “severe persistent  
21 NSP” (9%). Several personal and occupational factors, as well as symptom characteristics at  
22 baseline predicted trajectory class membership. However, understanding the occupational and  
23 clinical relevance of trajectories of NSP requires a determination of their predictive value  
24 against core occupational and clinical outcomes. Particularly, identifying NSP trajectories  
25 associated with unfavorable outcomes would likely aid targeted prevention and treatment.

26  
27  
28  
29  
30  
31  
32  
33  
34  
35  
36 The aim of this study is to determine the extent to which latent trajectories of NSP are  
37 associated with self-reported sick leave due to musculoskeletal pain and with work ability  
38 based on frequent repeated measures over 1 year in an occupational population. A second aim  
39 is to investigate the temporal association (within person) between fluctuations in NSP and the  
40 outcomes sick leave and work ability.

## 41 42 43 44 45 46 **Methods**

### 47 48 **Study design**

49  
50 This is a prospective study using data from the Danish Physical activity cohort with objective  
51 measurements (DPHacto). The study protocol for the cohort is reported in detail elsewhere.<sup>31</sup>  
52 Data collection took place from April 2012 to May 2014 at 15 Danish companies, including  
53 workers in four occupational sectors (cleaning, manufacturing, transportation and office  
54 work/administration). The initial contact and recruitment of companies were performed in  
55  
56  
57  
58  
59  
60



1  
2  
3 collaboration with a large Danish union. The companies were selected to represent blue-collar  
4 occupations with different levels of physical demands at work.  
5  
6  
7

8 Baseline data collection consisted of a brief web-based questionnaire, a standard health  
9 examination and objective diurnal measurements of physical activity and heart rate (presented  
10 elsewhere.<sup>32 33</sup> Prospective self-reported data on musculoskeletal pain, sick leave due to pain  
11 and work ability was collected repeatedly over 12 months using text messages.  
12  
13  
14  
15

### 16 **Study population**

17 The inclusion criterion for participation was current employment within any of the recruited  
18 work places. Exclusion criteria were holding a managing position or being pregnant or a  
19 student/trainee. In addition, workers not responding to the baseline questionnaire and/or the  
20 prospective measurements were excluded.  
21  
22  
23  
24  
25

26 Among the 2107 invited workers, 1119 agreed to participate and 32 of them were excluded  
27 due to holding a managing position (n=17) or being pregnant (n=2) or a student/trainee  
28 (n=13). Of the remaining 1087 eligible workers, 782 responded to the questionnaire and 748  
29 took part in the prospective measurements from baseline. Thus, the final study sample  
30 consisted of 748 workers (blue-collar, n=620; white collar, n=128). Descriptive characteristics  
31 of the study population are shown in Table 1.  
32  
33  
34  
35  
36  
37  
38

39 All participants provided their written informed consent prior to participation. The present  
40 study was conducted according to the Declaration of Helsinki, approved by the Danish Data  
41 Protection Agency, and evaluated by the Regional Ethics Committee in Copenhagen,  
42 Denmark (H-2-2012-011).  
43  
44  
45  
46  
47

### 48 **Repeated assessment using text messages**

49 Text messages (SMS) were used to assess self-reported pain intensity in the neck-shoulder  
50 region, days on sick leave and work ability using the commercial software “SMS-Track”  
51 (<https://sms-track.com/>). Starting at baseline, data on NSP and sick leave were collected at  
52 four week intervals (14 waves), while data on work ability were collected at 12 week intervals  
53 (4 waves in total) during the 1-year study. The SMS were sent on Sundays, with a reminder  
54 the following day.  
55  
56  
57  
58  
59  
60

### Neck-shoulder pain

Pain intensity in the neck-shoulder region (NSP) the past month was assessed using an 11-point numeric rating scale (NRS), which ranges from 0 (“no pain”) to 10 (“worst pain imaginable”). The worker responded to the question “*rate the worst pain you have experienced in your neck/shoulders within the past month?*” The NRS is a reliable and valid instrument for assessing pain intensity<sup>34</sup> and is recommended as an outcome in clinical trials.<sup>35</sup>

### Sick leave

Sick-leave due to pain was assessed using a single-item from the validated Outcome Evaluation Questionnaire<sup>36</sup>: “*Within the past month, how many days have you been absent from work due to pain in muscles or joints?*” with response categories ranging from 0 to 31 days. Based on a recent meta-analysis, self-reported sick leave demonstrates good test-retest reliability and reasonably high convergent validity against records.<sup>37</sup>

### Work ability

Work ability was assessed using a validated single item<sup>22</sup> from the work ability index.<sup>38</sup> The worker responded to the question “*Please rate your present work ability?*” with response categories ranging from 0 (unable to work) to 10 (“work ability as its best”). A score  $\leq 7$  denotes poor work ability.<sup>39</sup>

### Assessment of possible confounders and effect modifiers

Theoretical assumptions and empirical evidence were used to select possible confounders and effect modifiers which were accounted for in the statistical analyses. The following variables were measured at baseline as previously described<sup>30</sup>: age (years,) and gender (male or female) based on civil registration number, body mass index (BMI) based on objectively measured height and weight, occupational sector (manufacturing, cleaning, transportation, and administration/office work within the same workplaces), and seniority in the current job (years). Physical work load was measured by the question “*How physically demanding do you normally consider your present work?*” using a ten-point (1-10) response scale modified from Borg,<sup>40</sup> with higher values indicating higher physical demands. Multisite pain was measured based on the Standardized Nordic questionnaire for the analysis of musculoskeletal symptoms<sup>41</sup> asking about pain intensity (NRS, scale 0-10) during the past three months in

1  
2  
3 seven different anatomical areas (i.e. neck/shoulders, elbows, hands/wrists, lower back, hips,  
4 knees, and feet/ankles). A cut-point of  $>2$  was used to indicate the occurrence of pain,  
5 whereby the number of pain sites was determined.<sup>42</sup> Since the relationship between NSP, sick  
6 leave and work ability may depend on the level of physical demands at work, physical work  
7 load was considered both a confounder and an effect modifier, while the other variables were  
8 solely included as possible confounders.  
9  
10  
11  
12  
13

### 14 15 **Statistical analyses**

16  
17 Growth trajectories (latent classes) of the intensity in NSP were identified using LCGA in  
18 Latent Gold version 5.1 (Statistical innovations Belmont, MA, USA). The LCGA procedure  
19 and the resulting trajectory classes of NSP are described in a previous study on the same  
20 population.<sup>30</sup> In brief, the LCGA assigns individuals to latent classes based on maximum  
21 posterior probabilities. That is, using growth parameters (i.e. intercept, slope and residual  
22 variance) reflecting change in an observed variable (i.e. pain intensity) over time, LCGA  
23 assigns individuals to latent classes (categorical variable) assuming homogeneity within class  
24 and heterogeneity between classes.<sup>29 43</sup>  
25  
26  
27  
28  
29  
30  
31

32  
33 The LCGA models were performed using Time (14 waves over 1 year) as a continuous linear  
34 predictor and NSP intensity as a continuous dependent variable. Missing values were  
35 considered as missing at random and included in all models without imputations. The optimal  
36 number of classes was determined based on appropriate model fit indices, i.e. Bayesian  
37 information criterion (BIC), Entropy and Bootstrap log likelihood ratio (BLRT), which were  
38 obtained in consecutive LCGA models with 1-10 a priori class solutions. Then, the models  
39 were evaluated based on the estimated growth parameters and clinical distinction between the  
40 identified classes. The identified trajectories of NSP were used as an independent variable in  
41 further statistical analyses of associations with sick leave and work ability over the same year.  
42  
43  
44  
45  
46  
47  
48

49  
50 The association of NSP trajectories with sick leave (SMS at four week intervals over 1 year)  
51 and work ability (SMS each quarter) during the same year was determined using Generalized  
52 Estimation Equation (GEE) models with an auto regressive first order (AR1) covariance  
53 structure to account for weaker correlations with increasing distance between time points.  
54  
55  
56  
57

58  
59 The association of NSP trajectories with sick-leave (days/month) was tested using GEE  
60 models with a Poisson distribution and a log link function. Fixed factors were NSP trajectory

1  
2  
3 class (categorical variable), time (continuous variable, 14 time points) and the interaction  
4 between trajectory class and time. The interaction term was kept in the model if it was  
5 significant ( $p < 0.05$ ). We tested both linear and quadratic time trends, but decided on a linear  
6 model since the quadratic model did not improve model fit. The primary GEE models were  
7 constructed in three steps: (model 1) unadjusted, (model 2) adjusted for age, gender and BMI,  
8 and (model 3) additionally adjusted for occupational sector (four categories) and physical  
9 work load (continuous variable). Then, we tested if the results of the primary models were  
10 consistent when accounting for baseline pain intensity and comorbidity of multisite pain, as  
11 they may be associated with both NSP trajectories and the outcomes. Thus, secondary models  
12 were estimated with additional adjustment for the intensity of NSP (model 4) and the number  
13 of pain regions (model 5) at baseline (past three months). Finally, to test for potential effect  
14 modification by physical work load, model 3 was re-run with an interaction between NSP  
15 trajectory class and physical work load (model 6).

16  
17  
18  
19  
20  
21  
22  
23  
24  
25  
26  
27 The association of NSP trajectory class with work ability (dependent variable, ordinal scale)  
28 was tested using GEE models with a multinomial distribution and a cumulative logit link  
29 function. Fixed factors were NSP trajectory class (categorical variable), time (linear  
30 continuous variable, 4 time points), and the interaction between trajectory class and time,  
31 which was kept only if reaching significance ( $p < 0.05$ ). The models were constructed with and  
32 without adjustment for covariates, as explained above.

33  
34  
35  
36  
37  
38  
39 Additional GEE models were constructed to investigate the within person association of  
40 temporal fluctuations in the intensity of NSP with sick leave and work ability (outcomes). To  
41 partition the within and between subjects variances in the predictor (intensity of NSP), the  
42 mean pain intensity score across all time points was determined for each individual. Then, the  
43 person mean pain score was subtracted from each repeated pain rating and used as an  
44 independent variable (within subject effect), while adjusting for the person mean pain as a  
45 covariate (between-subjects effect).<sup>43</sup> Thus, these GEE models were constructed with three  
46 fixed factors: (i) time (14 waves), (ii) the person mean pain intensity across waves, and (iii)  
47 the difference from the mean pain intensity during each wave for the individual (within  
48 subject effect). The within-subject effect would then reflect the population averaged  
49 association with the outcome for each unit change in pain intensity per month for the  
50 individual. Model specifications for sick leave and work ability were the same as above. The  
51  
52  
53  
54  
55  
56  
57  
58  
59  
60

1  
2  
3 models were estimated with and without adjustment for potential confounders as explained  
4 above.  
5  
6  
7

8 The GEE models were estimated using SPSS software version 22 (IBM, USA). For each  
9 model, we derived the exponential estimate, i.e. relative risk (RR) and odds ratio (OR) for  
10 sick leave and work ability, respectively, and 95% confidence intervals (CI). P-values <0.05  
11 were considered significant.  
12  
13  
14  
15

### 16 **Patient and public involvement**

17  
18 No patients or public were directly involved in setting the research questions and outcomes,  
19 design and conduct of this study, or interpretation of the results. Results will be disseminated  
20 to the participants at <http://www.nfa.dk/>.  
21  
22  
23  
24  
25

## 26 **Results**

### 27 **Characteristics of the study population**

28  
29 Characteristics of the study population are shown in Table 1. The study sample consisted of  
30 both males and females, and most were blue-collar workers. The workers were on average of  
31 middle age, slightly overweight, and had been in their current job for 14 years. The mean  
32 intensity of NSP across all time points was 2.6 (scale 0-10). Most of the workers rated high  
33 work ability (>7, scale 0-10) across the study period, while the average worker accumulated 6  
34 days on sick leave due to pain over 1 year, although with a considerable dispersion between  
35 individuals. Compliance to the repeated measurements (text messages) in the study was high;  
36 on average, the workers had 1.2 missing responses to pain and sick leave (14 waves) and 0.4  
37 missing responses to work ability (4 waves) (Table 1). The amount of missing data increased  
38 over time. During the second wave, the response rates were 96%, 96% and 93% for pain, sick  
39 leave and work ability, respectively, while the response rates dropped to 87%, 88% and 90%  
40 during the last wave.  
41  
42  
43  
44  
45  
46  
47  
48  
49  
50  
51

52  
53  
54  
55 [Insert Table 1 about here]  
56  
57  
58  
59  
60

### Identified latent trajectories of NSP

Based on model fit indices (BIC, Entropy and BLRT) and distinction between classes obtained from consecutive LCGA models, a six-class solution was chosen.<sup>30</sup> The growth pattern and prevalence (%) of the six identified trajectory classes of NSP were characterized as follows (see also Supplemental Figure A): class 1, *asymptomatic* (11%); class 2, *very low NSP* (10%); class 3, *low recovering NSP* (18%); class 4, *moderate fluctuating NSP* (28%); class 5, *strong fluctuating NSP* (24 %); and class 6, *severe persistent NSP* (9%). The trajectory classes with lower intensities of NSP (classes 1-3) did not differ in total days on sick leave or mean work ability over 1 year; and the occurrence of sick leave was very low, while work ability was high across the three classes. Thus, classes 1-3 were merged into a single category (low NSP 39%), which was used as a reference in further analyses.

### Association between NSP trajectory classes and sick leave over 1 year

Estimates of the association of NSP trajectories with sick leave due to pain (days /month) are shown in Table 2. There was no significant time effect on sick leave (unadjusted RR=1.02, 95%CI 0.99-1.06). Thus, the interaction between NSP trajectory class and time was discarded from the models.

Based on the fully adjusted model (Table 2, model 3) referencing low NSP, the relative risk of sick leave increased for moderate (RR=3.1, 95%CI 1.8–5.5), strong fluctuating (RR=7.6, 95%CI 3.9–14.7), and severe persistent NSP (RR=13.8, 95%CI 6.7–28.5). On average, the estimated number of days on sick leave per month was 0.1 (95%CI 0.1–0.15) for low NSP, 0.3 (95%CI 0.2–0.4) for moderate NSP, 0.8 (95%CI 0.5–1.2) for strong NSP, and 1.5 (95%CI 1.0–2.4) for severe persistent NSP. Predicted values of sick leave for each wave over 1 year are shown in Figure 1.

Additional adjustment for multisite pain showed similar estimates for moderate NSP (RR=3.0, 95%CI 1.7–5.4), strong fluctuating NSP (RR=7.2, 95%CI 3.5–14.5) and severe persistent NSP (RR=13.1, 95%CI 6.1–28). Also, adjustment for baseline pain intensity revealed stronger estimates for moderate NSP (RR=3.7, 95%CI 2.1–6.8), strong fluctuating NSP (RR=10.9, 95%CI 5.1–23.7) and severe persistent NSP (RR=24.5, 95%CI 10.4–57.9), although with wider CIs.

There was no significant interaction between NSP trajectory class and physical work load on sick leave.

[Insert Figure 1 about here]

### **Association between NSP trajectory classes and work ability over 1 year**

Estimates of the association between trajectories of NSP and work ability (measured each quarter) are shown in Table 2.

There was a small time effect indicating reduced work ability over the year (unadjusted OR 1.05, 95%CI 0.99–1.11). There was no interaction between NSP trajectory class and time, whereby this interaction was discarded from the model.

NSP trajectory class was inversely associated with work ability (Table 2). Based on the fully adjusted model referencing low NSP (Table 2, model 3), the likelihood of a 1-unit reduction in work ability increased for moderate (OR=2.4, 95%CI 1.8–3.2), strong fluctuating (OR=8.1, 95%CI 5.9–11.2), and severe persistent NSP (OR=12.9, 95%CI 8.5–19.7). The median scores (IQR) of work ability during the year were 9.5(1.7) for low NSP, 9.0(2.0) for moderate NSP, 7.8(2.0) for strong NSP, and 7.1(2.5) for severe persistent NSP.

Additional adjustment for multisite pain showed slightly weaker estimates for moderate NSP (OR=2.2, 95%CI 1.7–2.9), strong fluctuating NSP (OR=6.4, 95%CI 4.6–9.0) and severe persistent NSP (OR=10.4, 95%CI 6.7–16.0). Further, adjustment for baseline pain intensity showed similar estimates for moderate NSP (OR=2.6, 95%CI 1.9–3.5), strong fluctuating NSP (OR=9.1, 95%CI 6.3–13.1) and severe persistent NSP (OR=15.4, 95%CI 9.3–25.5).

There was no significant interaction between NSP trajectory class and physical work load on work ability.

[Insert Table 2 about here]

### **Within-person association of NSP with sick leave and workability**

Due to the high work ability scores and low prevalence of sick leave in the classes with lower intensities of NSP, these analyses included only workers assigned to the trajectory classes strong fluctuating and severe persistent NSP (n=248).



1  
2  
3 The within-person associations of pain intensity with sick leave due to pain and work ability  
4 are shown in Table 3.  
5

6  
7 Within person fluctuations in the intensity of NSP were positively associated with sick leave  
8 (adjusted RR=1.11, 95%CI 1.02–1.21). That is, higher intensity of NSP was associated with  
9 more days of sick leave during a particular month at the individual level (Table 3 and Figure  
10 2a).  
11  
12  
13

14  
15 A similar within-person association was found between fluctuations in pain intensity and  
16 work ability (adjusted OR 1.13, 95%CI 1.04–1.21). For example, increasing intensity of NSP  
17 was associated with higher probabilities of reduced work ability (Table 3). This association is  
18 illustrated in Figure 2b as the estimated probability of reporting poor work ability ( $\leq 7$  on the  
19 0-10 scale).<sup>39</sup>  
20  
21  
22  
23  
24  
25  
26

27 [Insert Table 3 about here]  
28

29 [Insert Figure 2]  
30  
31  
32  
33  
34  
35  
36  
37  
38  
39  
40  
41  
42  
43  
44  
45  
46  
47  
48  
49  
50  
51  
52  
53  
54  
55  
56  
57  
58  
59  
60



## Discussion

In summary, this prospective study investigated the relationship between LCGA-based trajectories of NSP and the outcomes sick leave and work ability. We found that the distinguished trajectory classes of NSP were strongly associated with sick leave due to pain and poor work ability over 1 year, and that the temporal fluctuations in pain intensity predicted sick leave and work ability at the individual level.

To our knowledge, this study is unique in assessing the association between LCGA-based trajectories of NSP and important prognostic outcomes among workers. A clear strength of the study is the use of frequent prospective measures of both exposure (intensity of NSP) and outcomes (work ability and sick leave) over 1 year. The high response rate to the SMS is also a strength supporting the feasibility of this method to obtain frequent repeated measurements of pain in future studies on the prognosis of NSP.

### Trajectories of NSP, sick leave and work ability

The trajectory classes of NSP used in this study were distinguished using LCGA, resulting in six distinct trajectories of NSP.<sup>30</sup> This corroborates a study by Lövgren et al. (2014) which used Growth Mixture Modeling to identify six trajectory classes of NSP in nursing students entering working life. In contrast, the severity of NSP in the current sample of workers was much higher, perhaps due to the large proportion of blue-collar workers in this study.<sup>1</sup> The high prevalence of strong fluctuating (24%) and severe persistent NSP (9%), with mean pain intensities of 5 and 7 (scale 0-10), respectively, is noteworthy.

Trajectory class of NSP was strongly associated with the number of days on sick leave over the 1-year study period. Particularly, the fully adjusted model indicated an increased relative risk of sick leave in the trajectory class with severe persistent NSP (mean 1.5 days/month), compared with low NSP (mean 0.1 days/month). This result is in line with previous prospective studies showing a positive association between NSP intensity and sick leave.<sup>4 6</sup> This result persisted with adjustment for potential confounding by multisite pain, which was associated with NSP and sick leave in previous studies.<sup>19 44 45</sup> Thus, severe persistent NSP appears to be strongly associated with sick leave due to musculoskeletal pain, regardless of multisite pain and other personal and occupational factors.

1  
2  
3 The four trajectory classes of NSP were also associated with poor work ability over the year  
4 (Table 2). For instance, the probability of reporting reduced work ability was 13 times higher  
5 for the trajectory class with severe persistent NSP (median work ability 7.1 on the 0-10 scale),  
6 compared with low NSP (median work ability 9.5), regardless of inclusion of potential  
7 confounders in the model (Table 2, model 3). In agreement, previous studies have found that  
8 intense NSP is associated with reduced work ability in workers,<sup>3 46</sup> although none of these  
9 examined pain trajectories. Interestingly, including baseline intensity of NSP (i.e. past 3  
10 months) as an additional covariate in model 3 did not reduce the estimated association for sick  
11 leave or work ability. In fact, this adjustment resulted in even stronger estimates for work  
12 ability, which clearly indicates that the LCGA-based trajectory classes of NSP have a  
13 predictive value beyond that explained by past pain intensity assessed at a single time point.  
14  
15  
16  
17  
18  
19  
20  
21  
22

23 The observed consistent associations between the identified trajectories of NSP and the  
24 outcomes sick leave and work ability support the prognostic value of LCGA-based  
25 trajectories of NSP among workers, and suggests that such sub-populations can be of clinical  
26 and occupational relevance. Thus, this study supports using LCGA to identify distinct sub-  
27 populations of workers with different patterns of NSP. Further, the increase in relative risk of  
28 sick leave and poor work ability for severe persistent NSP points to the need for interventions  
29 and preventive strategies aiming at reducing severe persistent NSP in working populations.  
30  
31  
32  
33  
34  
35  
36  
37  
38  
39

### 40 **Effect modification by physical work load**

41 High physical work load is a known risk factor for incident NSP and has been associated with  
42 a poor prognosis.<sup>47</sup> Thus, the association for NSP trajectories with sick leave and work ability  
43 was expected to be modified by the level of self-reported physical work load at baseline.  
44 However, we could not confirm any interaction between trajectory class of NSP and physical  
45 work load neither for sick leave nor work ability. Still, it is possible that more precise  
46 technical measurements of physical work exposure would have yielded different results.  
47  
48  
49  
50  
51  
52  
53  
54

### 55 **Association of temporal fluctuations in NSP with sick leave and work ability**

56  
57 NSP is often referred to as a recurrent and fluctuating condition.<sup>11</sup> However, the temporal  
58 fluctuations in NSP have rarely been investigated in detail, and few, if any, studies have  
59  
60

1  
2  
3 examined whether fluctuations in NSP are associated with sick leave and work ability. The  
4 frequent repeated measures allowed us to assess the within-person temporal association  
5 between fluctuations in the intensity of NSP and sick leave (every fourth week) and work  
6 ability (every twelfth week). We found that the within-person fluctuations in pain intensity  
7 were significantly associated with both sick leave and work ability, which persisted in the  
8 fully adjusted model (Table 3). That is, when the individual pain score increased, the  
9 likelihood of sick leave and poor work ability also increased. Thus, not only could we address  
10 the differences between workers in temporal patterns of NSP, but also whether the temporal  
11 fluctuations in NSP at the individual level are of predictive value.  
12  
13  
14  
15  
16  
17  
18  
19  
20  
21

## 22 **Methodological discussion**

23  
24 As this study is limited to self-reported measures of pain and the outcomes sick leave and  
25 work ability, one cannot overlook the possibility of bias. Regarding self-reported sick leave,  
26 meta-analytic evidence indicates reasonably high convergent validity against organization and  
27 register-based records, although with a slight tendency for under-reporting.<sup>37</sup> Thus, there is a  
28 risk for underestimation of sick leave in this study. The question about days on sick leave the  
29 past month did not distinguish between work days and non-work days, which may have  
30 resulted in less precise estimates. Also, although both outcomes sick leave and work ability  
31 were assessed prospectively over 1 year, the NSP trajectories were determined during the  
32 same time period and thus causal inferences should be made with caution. Still, it seems most  
33 likely that pain preceded the occurrence of sick leave, rather than the reverse relationship. The  
34 compliance to text messages was very high on average (Table 1). Still, missing data increased  
35 slightly over time, which might have introduced some uncertainties in the models.  
36  
37  
38  
39  
40  
41  
42  
43  
44  
45

46 We addressed several relevant factors as confounders or effect modifiers (physical work load)  
47 of the association of pain trajectories with sick leave and work ability. However, as the causes  
48 of sick leave and poor work ability are likely multifactorial,<sup>4 19 21</sup> the focus on pain trajectories  
49 as predictors is a potential limitation because it does not inform about other potentially  
50 important prognostic factors. Also, the possibility of residual confounding by non-measured  
51 factors cannot be ruled out. For instance, we did not measure comorbidity of chronic  
52 conditions that might be associated with both NSP trajectories and the outcomes.  
53  
54  
55  
56  
57  
58  
59  
60

1  
2  
3 Since this study was conducted in a non-random sample with a predominance of blue-collar  
4 workers, it is important to verify the study findings in other working populations. The general  
5 notion of NSP as a fluctuating and reoccurring condition<sup>11</sup> is corroborated by our data, but  
6 this is rarely taken into account in observational studies on NSP. The inclusion of residual  
7 variance in the LCGA model allowed us to distinguish trajectory classes with more or less  
8 fluctuating patterns of NSP. Temporal fluctuations were more prominent in the NSP  
9 trajectories with moderate and strong pain, which may have contributed to the lower relative  
10 risk of sick leave and poor work ability compared to the trajectory class with severe persistent  
11 NSP.  
12  
13  
14  
15  
16  
17  
18

19 Since the trajectories with lower intensities of NSP, i.e., including asymptomatic, very low  
20 NSP and low recovering NSP, did not differ regarding their low occurrence of sick leave and  
21 poor work ability, we decided to merge them into a single reference category in the prediction  
22 models. Still, it is possible that these three classes differ in other prognostic outcomes.  
23  
24  
25  
26  
27  
28

## 29 **Conclusion**

30  
31 This longitudinal study shows that severe persistent NSP is associated with sick leave due to  
32 pain and reduced work ability over 1 year among workers. The high prevalence of severe  
33 persistent NSP and the increase in relative risk of sick leave and poor work ability point to the  
34 need for preventive strategies aiming at reducing severe persistent NSP among workers.  
35 Overall, our findings contribute with further understanding of the possible consequences of  
36 different time patterns and levels of NSP, which can be of general importance for researchers,  
37 practitioners and clinicians.  
38  
39  
40  
41  
42  
43  
44  
45

## 46 **Acknowledgements**

47 The study was supported by grants from the Danish government (Satspulje) and the Swedish  
48 Research Council for Health, Working Life and Welfare (Forte Dnr.2009–1761).  
49  
50  
51  
52

## 53 **Conflict of interest**

54 The authors declare none.  
55  
56  
57  
58  
59  
60

## Author contributions

DMH contributed to the statistical data analyses and drafting of the manuscript. AH and MBJ contributed to the conception, design, data collection and funding of the full DPhacto study. All authors (DMH, AH, SDL, MBJ, and CDNR) contributed to the conception of this study, discussed the results and commented on the manuscript.

## Data sharing statement

Additional data can be accessed on request by email ([aho@arbejdsmiljoforskning.dk](mailto:aho@arbejdsmiljoforskning.dk)).

## References

- 1 Côté P, van der Velde G, Cassidy JD et al. The Burden and Determinants of Neck Pain in Workers: Results of the Bone and Joint Decade 2000-2010 Task Force on Neck Pain and Its Associated Disorders. *J Manipulative Physiol Ther* 2009;32:S70-S86.
- 2 Vos T, Barber RM, Bell B et al. Global, regional, and national incidence, prevalence, and years lived with disability for 301 acute and chronic diseases and injuries in 188 countries, 1990-2013: a systematic analysis for the Global Burden of Disease Study 2013. *The Lancet* 2015;386:743-800.
- 3 Rashid M, Kristofferzon M-L, Heiden M, Nilsson A. Factors related to work ability and well-being among women on sick leave due to long-term pain in the neck/shoulders and/or back: a cross-sectional study. *BMC Public Health* 2018;18:672.
- 4 Holtermann A, Hansen JV, Burr H, Sogaard K. Prognostic factors for long-term sickness absence among employees with neck-shoulder and low-back pain. *Scand J Work Environ Health* 2010;36:34-41.
- 5 Burdorf A, Naaktgeboren B, Post W. Prognostic factors for musculoskeletal sickness absence and return to work among welders and metal workers. *Occup Environ Med* 1998;55:490-5.
- 6 Andersen LL, Clausen T, Burr H, Holtermann A. Threshold of Musculoskeletal Pain Intensity for Increased Risk of Long-Term Sickness Absence among Female Healthcare Workers in Eldercare. *PLoS One* 2012;7:e41287.
- 7 Borghouts JAJ, Koes BW, Vondeling H, Bouter LM. Cost-of-illness of neck pain in The Netherlands in 1996. *Pain* 1999;80:629-636.
- 8 Woodhouse A, Pape K, Romundstad PR, Vasseljen O. Health care contact following a new incident neck or low back pain episode in the general population; the HUNT study. *BMC Health Serv Res* 2016;16:81.
- 9 Hansson EK, Hansson TH. The costs for persons sick-listed more than one month because of low back or neck problems. A two-year prospective study of Swedish patients. *Eur Spine J* 2005;14:337-345.
- 10 Fejer R, Jordan A, Hartvigsen J. Categorising the severity of neck pain: Establishment of cut-points for use in clinical and epidemiological research. *Pain* 2005;119:176-182.
- 11 Carroll L, Hogg-Johnson S, Côté P et al. Course and Prognostic Factors for Neck Pain in Workers. *Eur Spine J* 2008;17:93-100.

- 1  
2  
3 12 Bruls VEJ, Bastiaenen CHG, de Bie RA. Prognostic factors of complaints of arm,  
4 neck, and/or shoulder: a systematic review of prospective cohort studies. *Pain*  
5 2015;156:765-788.  
6  
7  
8 13 Côté P, Cassidy JD, Carroll LJ, Kristman V. The annual incidence and course of neck  
9 pain in the general population: a population-based cohort study. *Pain* 2004;112:267-  
10 273.  
11  
12  
13 14 Lövgren M, Gustavsson P, Melin B, Rudman A. Neck/shoulder and back pain in new  
14 graduate nurses: A growth mixture modeling analysis. *Int J Nurs Stud* 2014;51:625-  
15 639.  
16  
17  
18 15 Kongsted A, Kent P, Axen I, Downie AS, Dunn KM. What have we learned from ten  
19 years of trajectory research in low back pain? *BMC Musculoskelet Disord*  
20 2016;17:220.  
21  
22  
23 16 Axén I, Leboeuf-Yde C. Trajectories of low back pain. *Best Practice & Research*  
24 *Clinical Rheumatology* 2013;27:601-612.  
25  
26  
27 17 Dunn KM, Campbell P, Jordan KP. Long-term trajectories of back pain: cohort study  
28 with 7-year follow-up. *BMJ Open* 2013;3:e003838.  
29  
30  
31 18 de Vries H, Reneman M, Groothoff J, Geertzen J, Brouwer S. Workers Who Stay at  
32 Work Despite Chronic Nonspecific Musculoskeletal Pain: Do They Differ from  
33 Workers with Sick Leave? *Journal of Occupational Rehabilitation* 2012;22:489-502.  
34  
35  
36 19 Feleus A, Miedema HS, Bierma-Zeinstra SMA, Hoekstra T, Koes BW, Burdorf A.  
37 Sick leave in workers with arm, neck and/or shoulder complaints; defining occurrence  
38 and discriminative trajectories over a 2-year time period. *Occup Environ Med* 2016.  
39  
40  
41 20 Ilmarinen J, von Bonsdorff M. Work Ability. In: Whitbourne (ed.) *The Encyclopedia*  
42 *of Adulthood and Aging* 2005.  
43  
44  
45 21 van den Berg TIJ, Elders LAM, de Zwart BCH, Burdorf A. The effects of work-  
46 related and individual factors on the Work Ability Index: a systematic review. *Occup*  
47 *Environ Med* 2009;66:211.  
48  
49  
50 22 Ahlstrom L, Grimby-Ekman A, Hagberg M, Dellve L. The work ability index and  
51 single-item question: associations with sick leave, symptoms, and health--a  
52 prospective study of women on long-term sick leave. *Scand J Work Environ Health*  
53 2010;36:404-12.  
54  
55  
56 23 Lötters F, Burdorf A. Prognostic Factors for Duration of Sickness Absence due to  
57 Musculoskeletal Disorders. *Clin J Pain* 2006;22:212-221.  
58  
59  
60



- 1  
2  
3 24 Karels CH, Bierma-Zeinstra SM, Verhagen AP, Koes BW, Burdorf A. Sickness  
4 absence in patients with arm, neck and shoulder complaints presenting in physical  
5 therapy practice: 6 months follow-up. *Man Ther* 2010;15:476-481.  
6  
7  
8 25 Ariens GA, Bongers PM, Hoogendoorn WE, van der Wal G, van Mechelen W. High  
9 physical and psychosocial load at work and sickness absence due to neck pain. *Scand  
10 J Work Environ Health* 2002;28:222-31.  
11  
12  
13 26 Walton DM, Carroll LJ, Kasch H et al. An Overview of Systematic Reviews on  
14 Prognostic Factors in Neck Pain: Results from the International Collaboration on Neck  
15 Pain (ICON) Project. *Open Orthop J* 2013;7:494-505.  
16  
17  
18 27 Axén I, Bergström G, Bodin L. Using few and scattered time points for analysis of a  
19 variable course of pain can be misleading: an example using weekly text message  
20 data. *Spine J* 2014;14:1454-1459.  
21  
22  
23 28 Miranda H, Gold JE, Gore R, Punnett L. Recall of prior musculoskeletal pain. *Scand J  
24 Work Environ Health* 2006;32:294-9.  
25  
26  
27 29 Jung T, Wickrama KAS. An Introduction to Latent Class Growth Analysis and  
28 Growth Mixture Modeling. *Soc Personal Psychol Compass* 2008;2:302-317.  
29  
30  
31 30 Hallman DM, Nørregaard Rasmussen CD, Birk Jørgensen M, Holtermann A. Time  
32 course of neck-shoulder pain in workers: A longitudinal latent class growth analysis.  
33 *Scand J Work Environ Health* 2018;44:47-57.  
34  
35  
36 31 Jørgensen M, Korshøj M, Lagersted-Olsen J et al. Physical activities at work and risk  
37 of musculoskeletal pain and its consequences: protocol for a study with objective field  
38 measures among blue-collar workers. *BMC Musculoskelet Disord* 2013;14:1-9.  
39  
40  
41 32 Hallman DM, Birk Jørgensen M, Holtermann A. On the health paradox of  
42 occupational and leisure-time physical activity using objective measurements: Effects  
43 on autonomic imbalance. *PLoS One* 2017;12:e0177042.  
44  
45  
46 33 Hallman DM, Gupta N, Heiden M et al. Is prolonged sitting at work associated with  
47 the time course of neck-shoulder pain? A prospective study in Danish blue-collar  
48 workers. *BMJ Open* 2016;6:e012689.  
49  
50  
51 34 Ferreira-Valente MA, Pais-Ribeiro JL, Jensen MP. Validity of four pain intensity  
52 rating scales. *Pain* 2011;152:2399-2404.  
53  
54  
55 35 Dworkin RH, Turk DC, Farrar JT et al. Core outcome measures for chronic pain  
56 clinical trials: IMMPACT recommendations. *Pain* 2005;113:9-19.  
57  
58  
59 36 Keefe FJ, Linton SJ, Lefebvre JC. The Outcome Evaluation Questionnaire:  
60 Description and Initial Findings. *Scand J Behaviour Ther* 1992;21:19-33.



- 1  
2  
3 37 Johns G, Miraglia M. The reliability, validity, and accuracy of self-reported  
4 absenteeism from work: A meta-analysis. *J Occup Health Psychol* 2015;20:1-14.  
5  
6 38 Tuomi K, Ilmarinen J, Jahkola A, Katajarinne L, Tulkki A. *Work ability index*.  
7 Helsinki: Finnish institute of occupational health, 1998.  
8  
9 39 Neupane S, Miranda H, Virtanen P, Siukola A, Nygard CH. Multi-site pain and work  
10 ability among an industrial population. *Occup Med (Lond)* 2011;61:563-9.  
11  
12 40 Borg G. Borg's perceived exertion and pain scales. *Champaign, IL: Human Kinetics*  
13 1998.  
14  
15 41 Kuorinka I, Jonsson B, Kilbom A et al. Standardised Nordic questionnaires for the  
16 analysis of musculoskeletal symptoms. *Appl Ergon* 1987;18:233-237.  
17  
18 42 Neupane S, Leino-Arjas P, Nygård C-H, Oakman J, Virtanen P. Developmental  
19 pathways of multisite musculoskeletal pain: what is the influence of physical and  
20 psychosocial working conditions? *Occup Environ Med* 2017;74:468-475.  
21  
22 43 Hoffman L, Stawski RS. Persons as Contexts: Evaluating Between-Person and  
23 Within-Person Effects in Longitudinal Analysis. *Research in Human Development*  
24 2009;6:97-120.  
25  
26 44 Sarquis LMM, Coggon D, Ntani G et al. Classification of neck/shoulder pain in  
27 epidemiological research: a comparison of personal and occupational characteristics,  
28 disability, and prognosis among 12,195 workers from 18 countries. *Pain*  
29 2016;157:1028-1036.  
30  
31 45 Haukka E, Kaila-Kangas L, Ojajärvi A et al. Pain in multiple sites and sickness  
32 absence trajectories: A prospective study among Finns. *Pain* 2013;154:306-312.  
33  
34 46 Bugajska J, Sagan A. Chronic musculoskeletal disorders as risk factors for reduced  
35 work ability in younger and ageing workers. *Int J Occup Saf Ergon* 2014;20:607-15.  
36  
37 47 Mayer J, Kraus T, Ochsmann E. Longitudinal evidence for the association between  
38 work-related physical exposures and neck and/or shoulder complaints: a systematic  
39 review. *Int Arch Occup Environ Health* 2012;85:587-603.  
40  
41  
42  
43  
44  
45  
46  
47  
48  
49  
50  
51  
52  
53  
54  
55  
56  
57  
58  
59  
60

## Tables

**Table 1** Descriptive characteristics of the study population (n=748)

|                                                        | N        | Median | IQR | Mean | SD   |
|--------------------------------------------------------|----------|--------|-----|------|------|
| Age (years)                                            | 748      |        |     | 44.8 | 9.6  |
| Men N (%)                                              | 411 (55) |        |     |      |      |
| BMI (kg×m <sup>2</sup> )                               | 732      |        |     | 27.3 | 4.8  |
| Seniority (years)                                      | 722      |        |     | 13.5 | 10.3 |
| Administration workers N (%)                           | 128 (17) |        |     |      |      |
| Blue-collar workers N (%)                              | 620 (83) |        |     |      |      |
| Cleaning                                               | 115 (15) |        |     |      |      |
| Manufacturing                                          | 448 (60) |        |     |      |      |
| Transportation                                         | 57 (8)   |        |     |      |      |
| Physical work load at baseline (scale 1-10)            | 723      |        |     | 5.3  | 2.4  |
| Sick leave days                                        |          |        |     |      |      |
| Baseline (days/month)                                  | 741      | 0.0    | 0.0 | 0.3  | 1.9  |
| Last follow-up (days/month)                            | 655      | 0.0    | 0.0 | 0.4  | 2.5  |
| Total days (over all time points)                      | 746      | 0.0    | 3.0 | 5.8  | 20.9 |
| Work ability (scale 0-10)                              |          |        |     |      |      |
| Baseline                                               | 646      | 9.0    | 2.0 | 8.5  | 2.0  |
| Last follow-up                                         | 671      | 9.0    | 2.0 | 8.2  | 2.4  |
| Mean work ability (over all time points)               | 732      | 8.8    | 2.5 | 8.3  | 1.7  |
| NSP intensity (scale 0-10)                             |          |        |     |      |      |
| Baseline                                               | 748      | 2.0    | 5.0 | 3.0  | 2.7  |
| Last follow-up                                         | 652      | 2.0    | 4.0 | 2.4  | 2.7  |
| Mean NSP intensity (over all time points)              | 748      | 2.0    | 3.6 | 2.6  | 2.3  |
| Number of pain regions at baseline (count)             | 745      | 1.0    | 3.0 | 1.7  | 1.5  |
| Compliance to text messages (missing responses, count) |          |        |     |      |      |
| NSP intensity                                          | 748      | 0.0    | 1.0 | 1.2  | 2.7  |
| Sick leave                                             | 746      | 0.0    | 1.0 | 1.2  | 2.6  |
| Work ability                                           | 732      | 0.0    | 1.0 | 0.4  | 0.7  |

Abbreviations: BMI, body mass index; NSP, neck-shoulder pain; IQR, inter quartile range.

**Table 2. Association** of neck-shoulder pain (NSP) trajectory class with sick leave (days/month) and work ability (ordinal scale 0-10) over 1 year, referencing low NSP.

| GEE models (classes) | N   | Sick leave |       |             |             | Work ability |       |             |             |
|----------------------|-----|------------|-------|-------------|-------------|--------------|-------|-------------|-------------|
|                      |     | p-value    | RR    | 95%CI Lower | 95%CI Upper | p-value      | OR    | 95%CI Lower | 95%CI Upper |
| <b>Model 1</b>       |     |            |       |             |             |              |       |             |             |
| Low NSP              | 292 |            | 1.00  |             |             |              | 1.00  |             |             |
| Moderate NSP         | 208 | <0.001     | 3.28  | 1.89        | 5.68        | <0.001       | 2.45  | 1.87        | 3.21        |
| Strong NSP           | 178 | <0.001     | 8.98  | 4.78        | 16.89       | <0.001       | 8.64  | 6.38        | 11.69       |
| Severe NSP           | 70  | <0.001     | 17.64 | 9.36        | 33.23       | <0.001       | 15.07 | 9.94        | 22.85       |
| <b>Model 2</b>       |     |            |       |             |             |              |       |             |             |
| Low NSP              | 286 |            | 1.00  |             |             |              | 1.00  |             |             |
| Moderate NSP         | 204 | <0.001     | 3.25  | 1.87        | 5.64        | <0.001       | 2.40  | 1.83        | 3.16        |
| Strong NSP           | 174 | <0.001     | 8.61  | 4.54        | 16.33       | <0.001       | 9.03  | 6.62        | 12.31       |
| Severe NSP           | 68  | <0.001     | 16.00 | 8.17        | 31.34       | <0.001       | 14.77 | 9.63        | 22.66       |
| <b>Model 3</b>       |     |            |       |             |             |              |       |             |             |
| Low NSP              | 277 |            | 1.00  |             |             |              | 1.00  |             |             |
| Moderate NSP         | 199 | <0.001     | 3.11  | 1.75        | 5.52        | <0.001       | 2.43  | 1.84        | 3.20        |
| Strong NSP           | 165 | <0.001     | 7.58  | 3.91        | 14.71       | <0.001       | 8.12  | 5.91        | 11.16       |
| Severe NSP           | 66  | <0.001     | 13.83 | 6.72        | 28.49       | <0.001       | 12.93 | 8.50        | 19.67       |

Relative risk (RR) estimates, indicating the relative increase in the number of days on sick leave per month, were obtained using Generalized Estimation Equation (GEE) with a Poisson distribution for days on sick-leave (measured at 4 week intervals). Odds ratios (OR), indicating the likelihood of a 1-unit reduction in work ability, were obtained using GEE with a multinomial distribution for work ability (measured at 12 week intervals).

Model 1: Unadjusted.

Model 2: Adjusted for age, gender and body mass index.

Model 3: Additionally adjusted for occupational sector (four categories, referencing administration) and physical work load.

**Table 3.** Within-person effect of temporal fluctuations in neck-shoulder pain intensity (scale 0-10) on sick leave (days/month) and work ability (scale 0-10) over 1 year

| GEE models | Sick leave |         |      |        |       | Work ability |      |        |       |  |
|------------|------------|---------|------|--------|-------|--------------|------|--------|-------|--|
|            | N          | p-value | RR   | 95% CI |       | p-value      | OR   | 95% CI |       |  |
|            |            |         |      | Lower  | Upper |              |      | Lower  | Upper |  |
| Model 1    | 248        | 0.008   | 1.12 | 1.03   | 1.21  | 0.005        | 1.11 | 1.03   | 1.19  |  |
| Model 2    | 242        | 0.008   | 1.12 | 1.03   | 1.21  | 0.009        | 1.11 | 1.03   | 1.19  |  |
| Model 3    | 231        | 0.011   | 1.11 | 1.02   | 1.21  | 0.002        | 1.13 | 1.04   | 1.21  |  |

Relative risk (RR) estimates, indicating the relative increase in the number of days on sick leave per month, were obtained using Generalized Estimation Equation (GEE) with a Poisson distribution for days on sick-leave (measured at 4 week intervals). Odds ratios (OR), indicating the likelihood of a 1-unit reduction in work ability, were obtained using GEE with a multinomial distribution for work ability (measured at 12 week intervals). Estimates indicate the within-person effect of change in pain intensity on change in sick leave and work ability per month.

Model 1: adjusted for the person mean pain intensity across time points.

Model 2: additionally adjusted for age, gender and BMI.

Model 3: additionally adjusted for occupational sector and physical work load.

## Figure legends

**Figure 1.** Mean 1-year trajectories of days on sick leave obtained in the fully adjusted model in each trajectory class of neck-shoulder pain (NSP). The x-axis represents the 14 pain ratings over 1 year. The y-axis represents the mean predicted number of days on sick leave per month.

**Figure 2.** Association between temporal fluctuations in neck-shoulder pain intensity (NSP) and the outcomes sick leave and work ability. The x-axis represents the difference in pain intensity scores from the person mean pain intensity across time points. The y-axis represents the predicted number of days on sick leave per month (Fig. 2a) and the predicted cumulative probability of poor work ability (Fig. 2b), as defined by the cut-point  $\leq 7$  (scale 0-10).<sup>39</sup>

## Supplemental Figures

**Supplemental Figure A.** Mean predicted intensity of neck-shoulder pain (NSP) over 1 year in the four trajectory classes of NSP obtained using Latent class growth analysis.

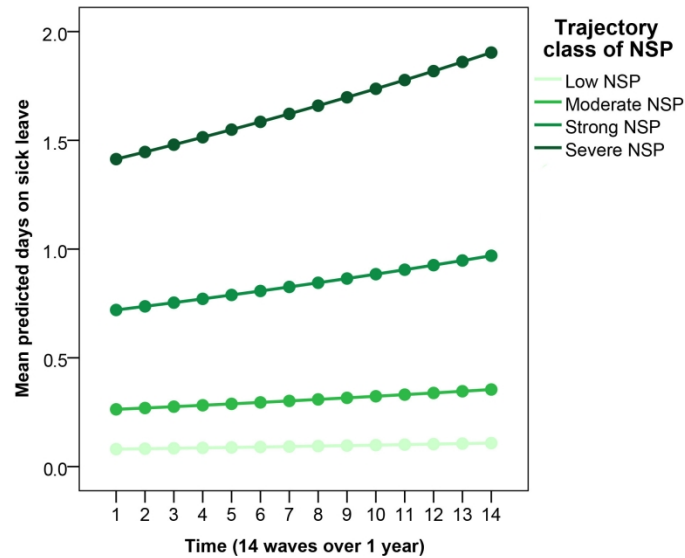

Figure 1.

Figure 1. Mean 1-year trajectories of days on sick leave obtained in the fully adjusted model in each trajectory class of neck-shoulder pain (NSP). The x-axis represents the 14 pain ratings over 1 year. The y-axis represents the mean predicted number of days on sick leave per month.

215x279mm (300 x 300 DPI)

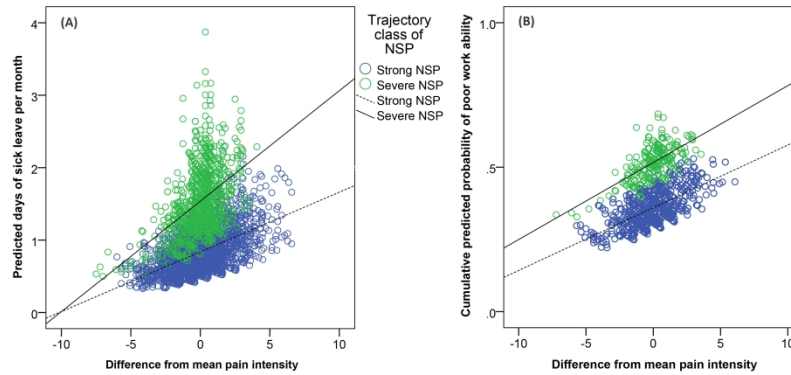

Figure 2

Figure 2. Association between temporal fluctuations in neck-shoulder pain (NSP) and the outcomes sick leave and work ability. The x-axis represents the difference in pain intensity scores from the person mean pain intensity across time points. The y-axis represents the predicted number of days on sick leave per month (Fig. 2a) and the predicted cumulative probability of poor work ability (Fig. 2b), as defined by the cut-point  $\leq 7$  (scale 0-10).

350x199mm (300 x 300 DPI)

1  
2  
3  
4  
5  
6  
7  
8  
9  
10  
11  
12  
13  
14  
15  
16  
17  
18  
19  
20  
21  
22  
23  
24  
25  
26  
27  
28  
29  
30  
31  
32  
33  
34  
35  
36  
37  
38  
39  
40  
41  
42  
43  
44  
45  
46  
47  
48  
49  
50  
51  
52  
53  
54  
55  
56  
57  
58  
59  
60



Supplemental Figure A.

Supplemental Figure A. Mean predicted intensity of neck-shoulder pain (NSP) over 1 year in the four trajectory classes of NSP obtained using Latent class growth analysis.



## STROBE Statement—checklist of items that should be included in reports of observational studies

|                              | Item No | Recommendation                                                                                                                                                                                                                                                                                                                                                                                                                                                         | Check yes/no                                              |
|------------------------------|---------|------------------------------------------------------------------------------------------------------------------------------------------------------------------------------------------------------------------------------------------------------------------------------------------------------------------------------------------------------------------------------------------------------------------------------------------------------------------------|-----------------------------------------------------------|
| <b>Title and abstract</b>    | 1       | (a) Indicate the study's design with a commonly used term in the title or the abstract                                                                                                                                                                                                                                                                                                                                                                                 | yes                                                       |
|                              |         | (b) Provide in the abstract an informative and balanced summary of what was done and what was found                                                                                                                                                                                                                                                                                                                                                                    | yes                                                       |
| <b>Introduction</b>          |         |                                                                                                                                                                                                                                                                                                                                                                                                                                                                        |                                                           |
| Background/rationale         | 2       | Explain the scientific background and rationale for the investigation being reported                                                                                                                                                                                                                                                                                                                                                                                   | yes, p4-5                                                 |
| Objectives                   | 3       | State specific objectives, including any prespecified hypotheses                                                                                                                                                                                                                                                                                                                                                                                                       | yes, p5                                                   |
| <b>Methods</b>               |         |                                                                                                                                                                                                                                                                                                                                                                                                                                                                        |                                                           |
| Study design                 | 4       | Present key elements of study design early in the paper                                                                                                                                                                                                                                                                                                                                                                                                                | yes, p5                                                   |
| Setting                      | 5       | Describe the setting, locations, and relevant dates, including periods of recruitment, exposure, follow-up, and data collection                                                                                                                                                                                                                                                                                                                                        | yes, p5                                                   |
| Participants                 | 6       | (a) <i>Cohort study</i> —Give the eligibility criteria, and the sources and methods of selection of participants. Describe methods of follow-up<br><i>Case-control study</i> —Give the eligibility criteria, and the sources and methods of case ascertainment and control selection. Give the rationale for the choice of cases and controls<br><i>Cross-sectional study</i> —Give the eligibility criteria, and the sources and methods of selection of participants | a) yes, p5-6                                              |
|                              |         | (b) <i>Cohort study</i> —For matched studies, give matching criteria and number of exposed and unexposed<br><i>Case-control study</i> —For matched studies, give matching criteria and the number of controls per case                                                                                                                                                                                                                                                 |                                                           |
| Variables                    | 7       | Clearly define all outcomes, exposures, predictors, potential confounders, and effect modifiers. Give diagnostic criteria, if applicable                                                                                                                                                                                                                                                                                                                               | yes, p6-8                                                 |
| Data sources/<br>measurement | 8*      | For each variable of interest, give sources of data and details of methods of assessment (measurement). Describe comparability of assessment methods if there is more than one group                                                                                                                                                                                                                                                                                   | yes, p6-8                                                 |
| Bias                         | 9       | Describe any efforts to address potential sources of bias                                                                                                                                                                                                                                                                                                                                                                                                              | yes, p7-8 and 9<br>(confounders and statistical analyses) |
| Study size                   | 10      | Explain how the study size was arrived at                                                                                                                                                                                                                                                                                                                                                                                                                              | yes, p6                                                   |
| Quantitative variables       | 11      | Explain how quantitative variables were handled in the analyses. If applicable, describe which groupings were chosen and why                                                                                                                                                                                                                                                                                                                                           | yes, p8-9                                                 |
| Statistical methods          | 12      | (a) Describe all statistical methods, including those used to control for confounding                                                                                                                                                                                                                                                                                                                                                                                  | yes p8-9                                                  |

|    |                                                                  |                  |
|----|------------------------------------------------------------------|------------------|
| 1  |                                                                  |                  |
| 2  | (b) Describe any methods used to examine subgroups and           | yes, p8-9        |
| 3  | interactions                                                     |                  |
| 4  | (c) Explain how missing data were addressed                      | yes, p8          |
| 5  | (d) <i>Cohort study</i> —If applicable, explain how loss to      | yes, p8; page 11 |
| 6  | follow-up was addressed                                          |                  |
| 7  | <i>Case-control study</i> —If applicable, explain how matching   |                  |
| 8  | of cases and controls was addressed                              |                  |
| 9  | <i>Cross-sectional study</i> —If applicable, describe analytical |                  |
| 10 | methods taking account of sampling strategy                      |                  |
| 11 |                                                                  |                  |
| 12 | (e) Describe any sensitivity analyses                            |                  |
| 13 |                                                                  |                  |

Continued on next page

For peer review only

| <b>Results</b>           |     |                                                                                                                                                                                                                                                                                                                                                                                                               | <b>Yes/no</b>                                             |
|--------------------------|-----|---------------------------------------------------------------------------------------------------------------------------------------------------------------------------------------------------------------------------------------------------------------------------------------------------------------------------------------------------------------------------------------------------------------|-----------------------------------------------------------|
| Participants             | 13* | (a) Report numbers of individuals at each stage of study—eg numbers potentially eligible, examined for eligibility, confirmed eligible, included in the study, completing follow-up, and analysed<br>(b) Give reasons for non-participation at each stage<br>(c) Consider use of a flow diagram                                                                                                               | Yes, p6 (flow) p 11 (compliance), and results tables 1-3. |
| Descriptive data         | 14* | (a) Give characteristics of study participants (eg demographic, clinical, social) and information on exposures and potential confounders<br>(b) Indicate number of participants with missing data for each variable of interest<br>(c) <i>Cohort study</i> —Summarise follow-up time (eg, average and total amount)                                                                                           | Yes, p11<br>Yes, p11 (table 1)                            |
| Outcome data             | 15* | <i>Cohort study</i> —Report numbers of outcome events or summary measures over time<br><i>Case-control study</i> —Report numbers in each exposure category, or summary measures of exposure<br><i>Cross-sectional study</i> —Report numbers of outcome events or summary measures                                                                                                                             | yes, p 11 (table 1)                                       |
| Main results             | 16  | (a) Give unadjusted estimates and, if applicable, confounder-adjusted estimates and their precision (eg, 95% confidence interval). Make clear which confounders were adjusted for and why they were included<br>(b) Report category boundaries when continuous variables were categorized<br>(c) If relevant, consider translating estimates of relative risk into absolute risk for a meaningful time period | Yes, tables 2-3<br>n/a                                    |
| Other analyses           | 17  | Report other analyses done—eg analyses of subgroups and interactions, and sensitivity analyses                                                                                                                                                                                                                                                                                                                | statistical methods and results                           |
| <b>Discussion</b>        |     |                                                                                                                                                                                                                                                                                                                                                                                                               |                                                           |
| Key results              | 18  | Summarise key results with reference to study objectives                                                                                                                                                                                                                                                                                                                                                      | yes, p15                                                  |
| Limitations              | 19  | Discuss limitations of the study, taking into account sources of potential bias or imprecision. Discuss both direction and magnitude of any potential bias                                                                                                                                                                                                                                                    | yes, p17                                                  |
| Interpretation           | 20  | Give a cautious overall interpretation of results considering objectives, limitations, multiplicity of analyses, results from similar studies, and other relevant evidence                                                                                                                                                                                                                                    | yes, p18                                                  |
| Generalisability         | 21  | Discuss the generalisability (external validity) of the study results                                                                                                                                                                                                                                                                                                                                         | yes, p17 (last paragraph)                                 |
| <b>Other information</b> |     |                                                                                                                                                                                                                                                                                                                                                                                                               |                                                           |
| Funding                  | 22  | Give the source of funding and the role of the funders for the present study and, if applicable, for the original study on which the present article is based                                                                                                                                                                                                                                                 | yes, p18                                                  |

\*Give information separately for cases and controls in case-control studies and, if applicable, for exposed and unexposed groups in cohort and cross-sectional studies.

1  
2 **Note:** An Explanation and Elaboration article discusses each checklist item and gives methodological background and  
3 published examples of transparent reporting. The STROBE checklist is best used in conjunction with this article (freely  
4 available on the Web sites of PLoS Medicine at <http://www.plosmedicine.org/>, Annals of Internal Medicine at  
5 <http://www.annals.org/>, and Epidemiology at <http://www.epidem.com/>). Information on the STROBE Initiative is  
6 available at [www.strobe-statement.org](http://www.strobe-statement.org).  
7  
8  
9  
10  
11  
12  
13  
14  
15  
16  
17  
18  
19  
20  
21  
22  
23  
24  
25  
26  
27  
28  
29  
30  
31  
32  
33  
34  
35  
36  
37  
38  
39  
40  
41  
42  
43  
44  
45  
46  
47  
48  
49  
50  
51  
52  
53  
54  
55  
56  
57  
58  
59  
60
